# Genetics of posttraumatic stress disorder and cardiovascular conditions using Life's Essential 8, Electronic Health Records, and Heart Imaging

Jie Shen MD<sup>1,2</sup>, Wander Valentim MD<sup>2,3</sup>, Eleni Friligkou MD<sup>2,4</sup>, Cassie Overstreet, PhD<sup>2,4</sup>, Karmel Choi PhD<sup>5</sup>, Dora Koller PhD<sup>2,4,6</sup>, Christopher J. O'Donnell MD, MPH<sup>8</sup>, Murray B. Stein MD-MPH<sup>7</sup>, Joel Gelernter MD<sup>2,4</sup>, Posttraumatic Stress Disorder Working Group of the Psychiatric Genomics Consortium, Haitao Lv MD-PhD<sup>1</sup>, Ling Sun MD-PhD<sup>1</sup>, Guido J. Falcone MD-ScD<sup>9</sup>, Renato Polimanti PhD<sup>2,4,10#</sup>, Gita A. Pathak PhD<sup>2,4#</sup>

1. Department of Cardiology, Children's Hospital of Soochow University, Suzhou, China.
2. Department of Psychiatry, Yale University School of Medicine, New Haven, CT, USA.
3. Faculdade de Medicina da Universidade Federal de Minas Gerais, Belo Horizonte, State of Minas Gerais, Brazil.
4. Veteran Affairs Connecticut Healthcare System, West Haven, CT, USA.
5. Center for Precision Psychiatry, Department of Psychiatry, Massachusetts General Hospital, Boston, MA, USA
6. Department of Genetics, Microbiology, and Statistics, Faculty of Biology, University of Barcelona, Catalonia, Spain
7. Cardiology Section, Department of Medicine, Veterans Affairs Boston Healthcare System, West Roxbury, Massachusetts
8. Department of Psychiatry, UC San Diego School of Medicine, University of California, San Diego, La Jolla, California; Herbert Wertheim School of Public Health and Human Longevity Science, University of California, San Diego, La Jolla, California; Veterans Affairs San Diego Healthcare System, San Diego, California.
9. Center for Brain and Mind Health Yale University New Haven CT USA; Department of Neurology Yale University New Haven CT USA
10. Department of Chronic Disease Epidemiology, Yale School of Public Health, New Haven, Connecticut, USA

#Corresponding authors: Gita A Pathak, 60 Temple Street, Suite 7A, New Haven, CT 06510, [gita.pathak@yale.edu](mailto:gita.pathak@yale.edu); Renato Polimanti, 60 Temple Street, Suite 7A, New Haven, CT 06510, [renato.polimanti@yale.edu](mailto:renato.polimanti@yale.edu)

## Running Title

Shared genetics of PTSD and cardiovascular disease

## Abstract

### BACKGROUND:

Patients with post-traumatic stress disorder (PTSD) experience higher risk of adverse cardiovascular (CV) outcomes. This study explores shared loci, and genes between PTSD and CV conditions from three major domains: CV diagnoses from electronic health records (CV-EHR), cardiac and aortic imaging, and CV health behaviors defined in Life's Essential 8 (LE8).

### METHODS:

We used genome-wide association study (GWAS) of PTSD (N=1,222,882), 246 CV diagnoses based on EHR data from Million Veteran Program (MVP; N=458,061), UK Biobank (UKBB; N=420,531), 82 cardiac and aortic imaging traits (N=26,893), and GWAS of traits defined in the LE8 (N = 282,271 ~ 1,320,016). Shared loci between PTSD and CV conditions were identified using local genetic correlations ( $r_g$ ), and colocalization (shared causal variants). Overlapping genes between PTSD and CV conditions were identified from genetically regulated proteome expression in brain and blood tissues, and subsequently tested to identify functional pathways and gene-drug targets. Epidemiological replication of EHR-CV diagnoses was performed in AllofUS cohort (AoU; N=249,906).

### RESULTS:

Among the 76 PTSD-susceptibility risk loci, 33 loci exhibited local  $r_g$  with 45 CV-EHR traits ( $|r_g| \geq 0.4$ ), four loci with eight heart imaging traits ( $|r_g| \geq 0.5$ ), and 44 loci with LE8 factors ( $|r_g| \geq 0.36$ ) in MVP. Among significantly correlated loci, we found shared causal variants (colocalization probability > 80%) between PTSD and 17 CV-EHR (in MVP) at 11 loci in MVP, that also replicated in UKBB and/or other cohorts. Of the 17 traits, the observational analysis in the AoU showed PTSD was associated with 13 CV-EHR traits after accounting for socioeconomic factors and depression diagnosis. PTSD colocalized with eight heart imaging traits on 2 loci and with LE8 factors on 31 loci. Leveraging blood and brain proteome expression, we found 33 and 122 genes, respectively, shared between PTSD and CVD. Blood proteome genes were related to neuronal and immune processes, while the brain proteome genes converged on metabolic and calcium-modulating pathways (FDR  $p < 0.05$ ). Drug repurposing analysis highlighted *DRD2*, *NOS1*, *GFAP*, and *POR* as common targets of psychiatric and CV drugs.

### CONCLUSION:

PTSD-CV comorbidities exhibit shared risk loci, and genes involved in tissue-specific regulatory mechanisms.

Keywords: PTSD; Cardiovascular Disease; Life's Essential 8; GWAS; electronic health records; Heart; Brain.

# 1 INTRODUCTION

---

Given that cardiovascular (CV)-related outcomes, including diseases and risk factors are the leading cause of morbidity and mortality worldwide <sup>1</sup>, it is imperative to extend our understanding of associations beyond traditionally known CV risk factors. Recently, the American Heart Association recognized the influence of psychological stress on adverse CV health <sup>2</sup>. Posttraumatic stress disorder (PTSD) is considered a stress-related mental disorder with a lifetime prevalence ranging from 2% to 25% <sup>3</sup>. PTSD and CV diseases are highly comorbid. Specifically, PTSD has been associated with CVD <sup>4</sup>, hypertension <sup>5</sup>, diabetes <sup>6</sup>, ischemic heart disease <sup>7</sup>, stroke <sup>8</sup>, carotid intima-media thickness <sup>9</sup>, and coronary artery disease <sup>10</sup>. PTSD and CVD have been reported to share several pathophysiological features. For instance, patients with PTSD have higher adrenergic activity both at baseline and after being subjected to stress-inducing situations <sup>11</sup>, imposing a chronically increased burden on both the heart and the circulatory system. High adrenergic states are also associated with CVD symptoms, including increased heart rate and acutely increased blood pressure <sup>12</sup>. Additionally, PTSD can increase the risk of CVDs by increasing the risk of dyslipidemia and diabetes, although the biology of this association is not yet fully understood <sup>13, 14</sup>.

Both PTSD and CVD have substantial genetic components, with heritability estimates of 30-40% for PTSD <sup>13, 15</sup> and 15-57% for hypertension, 26% for heart failure (HF), and 40-60% for coronary artery disease <sup>16-20</sup>. Recently, PTSD polygenic risk has been associated with several cardiovascular symptoms and disorders <sup>21</sup> and showed potential genetic causality towards cardiac arrhythmias <sup>21</sup>, ischemic stroke <sup>22</sup>, coronary artery disease, and hypertension <sup>23</sup>. However, several critical gaps remain in understanding the shared genetics between PTSD and CVD which were highlighted by the experts from the American Heart Association (AHA) and the National Heart, Lung, and Blood Institute <sup>24</sup>. In this study, we address some of these gaps by leveraging GWAS (genome-wide association study) data to study genetic overlap between PTSD <sup>25</sup> and CV outcomes from three different domains including EHR diagnoses, heart imaging <sup>26</sup> and Life's Essential 8 (LE8) key measures for improving and maintaining – evidence-based cardiovascular health as factors and behaviors recently outlined by the American Heart Association <sup>2</sup>. Specifically, we aimed to (i) identify loci that are shared between PTSD and CV conditions, (ii) test the specificity of PTSD-CVD comorbidity accounting for socioeconomic factors (BMI, smoking, deprivation index) and diagnosis of depression, and (iii) infer biological mechanisms underlying PTSD and CV outcomes based on tissue-specific transcriptomic regulation and proteomic gene-associations that overlap between PTSD and CVD traits ([Figure 1](#)).

Shared genetics of PTSD and cardiovascular disease

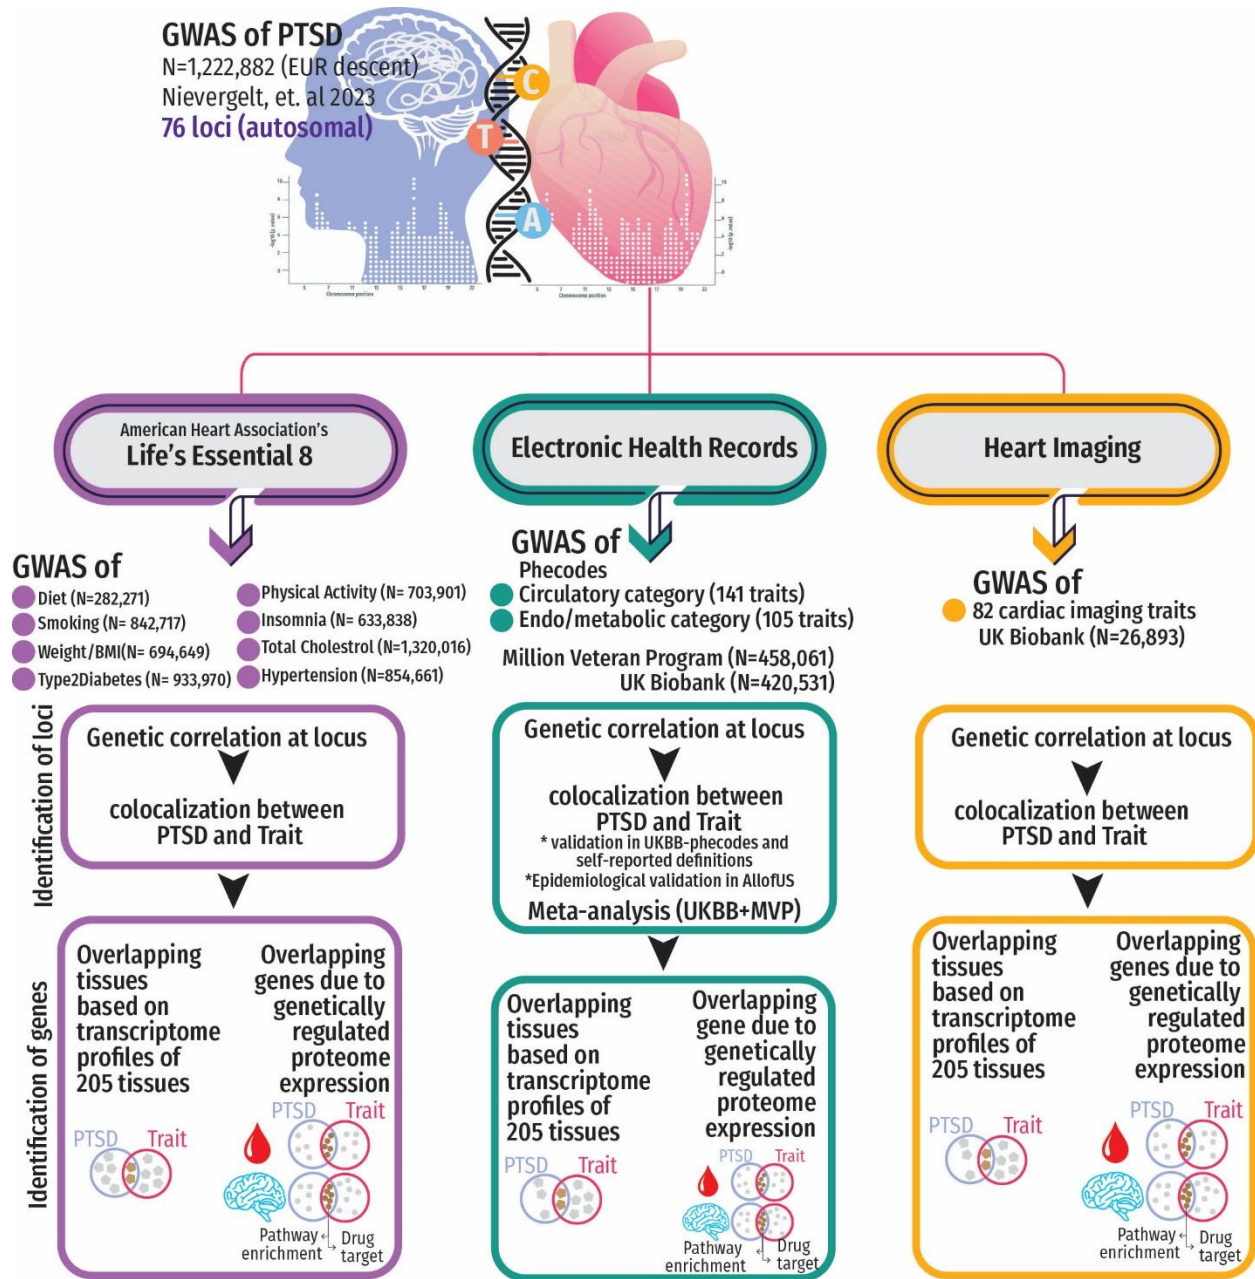

**Figure 1: Study Design:** We investigated loci shared between posttraumatic stress disorder (PTSD) and cardiovascular (CV)-related traits, including American Heart Association's Life Essential 8 factors, CV diagnoses derived from electronic health records (EHR), and cardiac imaging phenotypes. After identifying genetically correlated loci between PTSD and CV conditions, we investigated shared causal variants. For the EHR-based CV diagnoses, we performed replication of shared causal variants in UK Biobank and a follow-up analysis in All of US Research Program. The traits with evidence of PTSD-CV shared causal variants were tested with respect to tissue-specific transcriptomic and proteomic profiles. The overlapping genes were investigated for overrepresented pathways and drug targets.

## 2 METHODS

---

### 2.1 Study Populations

We conducted the study to explore the genetic overlap between PTSD and cardiovascular outcomes, as defined by electronic health records (EHR) and heart imaging (Figure 1). Because we used previously collected, deidentified, data, this study did not require institutional review board approval. Ethics approval and participants' consent was obtained by the original studies <sup>2, 26-39</sup>.

Summary statistics for GWAS of PTSD utilized in this study originated from a comprehensive meta-analysis led by Nievergelt et al. <sup>25</sup> that identified 76 autosomal loci ([Supplementary Table S1](#)). This meta-analysis encompasses findings from 88 studies gathered through the PGC-PTSD Freeze 3 data collection from three primary sources: PTSD studies employing clinician-administered or self-reported instruments (Freeze 2.5 plus subsequently collected studies, 77 studies), Million Veteran Program (MVP) release 3 GWAS utilizing the Posttraumatic Stress Disorder Checklist (PCL for DSM-IV), and 10 biobank studies incorporating EHR-derived PTSD status. In total, the study incorporated 95 GWASs, with a sample size of 1,222,882 individuals of European descent (effective sample size (Neff) = 641,533).

#### 2.1.1 GWAS of Cardiovascular and metabolic diagnoses using EHR *Million Veteran Program*

The CVD phenotype datasets utilized in this study were sourced from the MVP<sup>40</sup> (see data availability), a nationwide initiative sponsored by the Department of Veterans Affairs Office of Research and Development<sup>41</sup>. In our investigation of the genetic overlap between PTSD and cardiovascular clinical outcomes, we incorporated summary statistics from GWAS of EHR-based phecodes. Phecodes are manually curated groups of International Classification of Diseases (ICD) codes-9/10, designed to capture clinically meaningful concepts for research purposes using the PheMap which classifies diagnoses into 17 categories (available at <https://phewascatalog.org/>) <sup>42</sup>. We tested 141 diagnoses from circulatory and 105 from endocrine/metabolic categories. A detailed description of GWAS of these traits in 458,203 individuals of European genetic ancestry in MVP is available elsewhere<sup>40</sup>. ([Supplementary Table S2](#)).

#### 2.1.2 UK Biobank

To replicate MVP findings, we leveraged GWAS of EHR-based phecodes data available from the UK Biobank (UKBB)<sup>43</sup>. Specifically, we analyzed summary statistics of GWAS of phecodes in 420,531 participants of European descent performed by the Pan-UKBB initiative <sup>44</sup>. Each MVP trait was matched with a corresponding UKBB phenotype based on their phecode concordance. Because MVP phecodes 278.11, 427.21, 428.3 were not available in the UK Biobank, we paired them as follows: Phecode 278.11 (Morbid Obesity, MVP) to Phecode 278.1 (Obesity, UKBB), Phecode 427.21 (Atrial Fibrillation, MVP) to Phecode 427.2 (Atrial Fibrillation

and flutter, UKBB), and Phecode 428.3 (Heart failure with reduced EF [Systolic or combined heart failure], MVP) to Phecode 428.2 (Heart failure NOS, UKBB). The details of the replication datasets are presented in [Supplementary Table S3](#) with a comprehensive overview of clinical diagnoses, corresponding phecodes, study resources, and sample sizes.

### **2.1.3 Other GWAS cohorts**

In addition to the UKBB data, we replicated MVP findings also using 11 GWAS performed from major consortia that may include a combination of self-reported or clinical studies<sup>27-33</sup>. The sample sizes of these datasets ranged from 119,715 to 1,020,441, and their diagnoses were paired with corresponding phecodes ([Supplementary Table S3](#))<sup>29,33</sup>. For Type 2 Diabetes adjusted by BMI, we used summary statistics by the Diabetes Meta-Analysis of Trans-Ethnic association studies (DIAMANTE) Consortium<sup>31</sup>, which are genetically correlated ( $r_g$ ) with Phecode 250.2 (Type 2 Diabetes:  $r_g=0.992$ ,  $SE=0.008$ ;  $p<1\times 10^{-300}$ ) and Phecode 250 (Diabetes Mellitus  $r_g=0.991$ ,  $SE=0.008$ ;  $p<1\times 10^{-300}$ ).

### **2.1.4 GWAS of heart imaging phenotypes from UK Biobank**

To also explore PTSD relationship with the structure and function of the heart and aorta, we incorporated summary-level data from a cardiac imaging GWAS<sup>26</sup>. This study used information from UKBB participants who underwent comprehensive cardiovascular magnetic resonance (CMR) imaging and employed a machine learning regenerating and analyzing pipeline that resulted in 82 quantitative imaging phenotypes from 26,893 participants of European descent<sup>26</sup>. These phenotypes (e.g., short-axis, long-axis, and aortic cine images) provide a detailed characterization of cardiac and aortic structure and function ([Supplementary Table S2](#))<sup>26</sup>.

### **2.1.5 GWAS of traits used to define Life's Essential 8**

To investigate the role of other factors in the genetic overlap with CV health and PTSD, we considered the LE8 checklist defined by AHA, 2022<sup>2</sup>, which underscores eight key health factors and health behaviors related to CV well-being: eat better, be more active, quit tobacco, get healthy sleep, manage weight, control cholesterol, manage blood sugar, manage blood pressure. For our study, we identified 11 GWAS related to LE8 factors ( $N = 282,271 \sim 1,320,016$ ), including GWAS for diet (i.e., energy intake proportion of fat, carbohydrate, protein, each adjusted by body mass index, BMI)<sup>37</sup>, physical activity<sup>36</sup>, smoking<sup>35</sup>, insomnia<sup>38</sup>, BMI-adjusted waist-hip-ratio<sup>33</sup>, total cholesterol<sup>34</sup>, diabetes<sup>31</sup>, and hypertension [MVP+UKBB]. To maximize the sample size available, we meta-analyzed hypertension GWAS (phecode 401) available from MVP and UKBB resulting in a sample size of 433,585 cases and 421,076 controls. For insomnia, we generated two GWAS datasets, one meta-analyzing GWAS of insomnia from Watanabe and colleagues<sup>38</sup> with MVP GWAS of “unable to fall asleep” (SlpFall – 188,830 cases) and the other meta-analyzing Watanabe insomnia GWAS<sup>38</sup> with MVP GWAS of “waking up in the night and not be able to fall back asleep” (SlpWakePM – 216,711 cases). To maximize the sample size available, when needed, GWAS datasets were meta-analyzed using a fixed-effects inverse variance-weighted model available in METAL<sup>45</sup>. A detailed description of all cohorts is presented in [Supplementary Table S2](#).

## 2.2 Proteomic cohorts

### 2.2.1 Brain Proteomic Datasets

The Religious Orders Study and Rush Memory and Aging Project (ROS/MAP) proteome expression weights were generated by Wingo et al.<sup>46</sup>, using dorsolateral prefrontal cortex (dlPFC) tissues available from 376 individuals of European ancestry<sup>46</sup>. Briefly, their analyses included calculating the normalized abundance of 8,356 proteins. Among these, 1,475 proteins exhibited significant cis associations with genetic variation. The weights assigned to these proteins were used in our proteome-wide association study (PWAS). Comprehensive details regarding sample description, proteomic analysis, quality control, and statistical analyses can be found in the original paper by Wingo et al.<sup>46</sup>. Additionally, we utilized dlPFC genetic-proteomic data from the Banner Sun Health Research Institute (BANNER). This dataset comprises brain dlPFC samples from 152 individuals of European descent, with 8,168 proteins included in proteomic profiles following quality control<sup>46</sup>. Through the integration of proteomic data and SNP genotypes, 1,139 proteins exhibited significant heritability to genetic variation. Therefore, ROS/MAP (N=376) and BANNER (N=152), encompass a total of 1,797 proteins. (See Data Availability and Links).

### 2.2.2 Atherosclerosis Risk in Communities (ARIC) Study

To study the plasma proteome, we utilized data from Zhang and colleagues<sup>47</sup>. Proteomic data was derived from summary-level information obtained from The Atherosclerosis Risk in Communities (ARIC) Study, focusing on 7,213 individuals of European descent<sup>47</sup>. The study measures plasma proteome levels using the SOMAmer-V4 platform. After quality control, 1,348 plasma proteins exhibiting associations with common variants in cis regions were investigated in our PWAS study (See Data Availability and links).

### 2.2.3 UKBB-Plasma Proteome Project (UKB-PPP)

In addition to the ARIC Study, we tested data from the UK Biobank Pharma Proteomics Project (UKB-PPP). This project provides the plasma proteomic profiles of 54,219 participants along with genome-wide genotypes, exome sequencing, whole-body magnetic resonance imaging, electronic health records, blood and urine biomarkers, as well as physical and anthropometric measurements. UKB-PPP used Olink proteomics assay for proteome assessment, and reported expression weights for protein quantitative trait loci (pQTLs) for 2,923 unique proteins<sup>48</sup>.

## 2.3 Risk loci from PTSD GWAS

To identify genomic loci of interest in PTSD GWAS summary statistics, as per original study we used Functional Mapping and Annotation of Genome-Wide Association Studies (FUMA)<sup>49</sup>. Considering LD weights from the European reference populations of the 1000 Genomes Project, resulting in 76 independent genomic risk loci ( $P < 5 \times 10^{-8}$ ,  $r^2 < 0.6$ ,  $MAF \geq 0.01$ , LD distance  $< 250\text{kb}$ ) ([Supplementary Table S1](#)) as reported by Nievergelt et. al 2024.

## 2.4 Shared regions and variants between PTSD and the CVD traits

*Local Analysis of [co]Variant Association (LAVA)*

LAVA<sup>50</sup> was employed to identify loci exhibiting local genetic correlation between PTSD and a total of 328 CV traits across three categories. We applied univariate LAVA models at the 76 PTSD risk loci. Loci that reached false discovery rate significance at 5% (FDR  $q < 0.05$ ) for the heritability univariate models were selected for local genetic correlation between PTSD and each one of the CV/LE8 traits. Bivariate LAVA results were filtered to include only those cases where both traits exhibited significant univariate heritability on the locus, as determined by an FDR  $q < 0.05$ . Sample overlap was estimated with LD score regression with the European LD scores calculated from the 1000 Genomes as reference (<https://github.com/bulik/ldsc>). Variants that were not SNPs (e.g., indels) and SNPs that were strand-ambiguous, multi-allelic, and had a minor allele frequency (MAF)  $< 0.01$  were excluded.

### *Colocalization analysis*

Colocalization is a statistical approach used to assess whether pairs of traits share a putative causal variant within the same genomic region. COLOC employs a Bayesian approach, considering various variant-level hypotheses and calculating Bayes factors from SNP effect estimates and standard errors<sup>51</sup>. The variant-level hypotheses correspond to: H0 (no association to either trait), H1 (association to only trait 1), H2 (association to only trait 2), H3 (associations to both traits with different causal variants), and H4 (associations to both traits with shared causal variants)<sup>52</sup>. In our study, each genomic region was expanded by 500kb on either side of the position. COLOC<sup>51</sup> was applied to assess colocalization between PTSD and the significantly correlated trait. Results with H4 or H3 hypothesis probabilities  $\geq 80\%$  were considered as shared. For replication, we used data from UKBB and other cohorts considering H4 or H3 hypothesis probabilities  $\geq 70\%$  as strong evidence of shared variants.

### *Tissue and molecular-profile-based prioritization of genes within colocalized regions*

We used the UCSD Genome Browser Tool (see data availability and links) to identify genes within the colocalized regions with significant H4/H3 probability for PTSD with at least one CVD trait. Then, we gathered colocalization probabilities (H3 and H4) for molecular profiles of those genes and all reported phenotypes from published GWAS studies using OpenTargets<sup>53</sup>. By manually examining the traits, we defined the traits as psychiatric and/or CVDs.

## **2.5 Observational Analysis in All of Us Research Program**

Started in 2018, the National Institutes of Health's All of Us (AoU) Research Program has enrolled over 700,000 diverse participants, emphasizing health equity in the context of precision medicine. Leveraging EHR data available for 254,700 AoU participants<sup>54</sup>. Phecodes were derived from mapping International Classification of Disease ICD9/ICD10(CM) codes using Phecode Map (see data availability and links). Logistic regression using the PheWAS R package was employed to assess the association of PTSD (13,877 cases) with CV phecodes identified in MVP and UKBB analyses, considering three models (i) base-model (sex, age, self-reported race), (ii) socioeconomic (SES)-model (base model covariates plus BMI, smoking, deprivation index), and (iii) depression-model (SES-model covariates plus depression diagnosis: phecode 296.2-Ncases:72,143). The self-reported demographic characteristics of AoU are as follows: females (61.8%), average age in years =  $54 \pm 17$  (mean  $\pm$  SD), 57.17% White, 19.4% (self-identified race), Black or African American, 3.54% Asian, 0.62% Middle Eastern/North African, 1.92% More than



one population, 0.11% Native Hawaiian/Pacific Islander, and 17.1% None of the above), while 44.1% were smokers (past and current).

## 2.6 Proteome-Wide Association Study

Proteome-wide associations of PTSD and its colocalized traits were estimated. We integrated GWAS data with tissue-specific pQTLs. For the colocalized phecodes, PWAS was conducted using the meta-analysed GWAS combining MVP and UKBB as described above, using the FUnctional Summary-based ImputatiON (FUSION) (available at <http://gusevlab.org/projects/fusion/>)<sup>55</sup>.

PWAS using weights from UKB-PPP plasma proteomewas performed using Summary-based Mendelian Randomization (SMR)<sup>56, 57</sup>. The analysis was performed using SMR default settings (<https://yanglab.westlake.edu.cn/software/smr/#Overview>)<sup>56</sup>. The results were adjusted for multiple testing with FDR correction (FDR  $q < 0.05$ ).

## 2.7 In-silico functional Analysis

### 2.7.1 Pathway enrichment

To gain insight into the shared mechanisms between PTSD and CVD traits, we conducted pathway enrichment analysis based on the genes detected in brain and blood proteome-wide analyses. Pathway enrichments were sought using a web-based tool, g:Profiler (<https://biit.cs.ut.ee/gprofiler/gost>) among three libraries: Gene Ontology (GO), Kyoto Encyclopedia of Genes and Genomes (KEGG), and Reactome Pathway Database (REAC)<sup>58</sup>. GO Database contains three functional domains: cellular component (CC), molecular function (MF), and biological process (BP). A significance threshold of FDR  $q < 0.05$  was used to identify significant pathways.

### 2.7.2 Drug repurposing in research context

Significant genes from the brain and plasma PWAS and the prioritized genes from the colocalization analysis were used for identifying drugs from the drug-gene interaction database (DGidb)<sup>59</sup>. Secondly, we obtained information including drug ID, clinical uses and adverse effects from stored at OpenTargets (<https://www.opentargets.org/>) which are originally sourced from FDA database. The OpenTarget results were compared with current CVD and PTSD treatments, to identify drugs with overlapping functions and suggest new potential therapies.

## 3 RESULTS

---

### 3.1 Genetically correlated loci between PTSD and CVD Traits

We investigated 76 genome-wide significant (GWS) risk loci associated with the PTSD GWAS ( $P < 5 \times 10^{-8}$ , [Supplementary Table S1](#)) for local genetic correlation with GWAS of 246 CV-related phecodes from MVP, 82 cardiac imaging traits from UKBB, and LE8-related phenotypes from various studies. We observed statistically significant SNP-based heritability at 73 loci for all the phenotypes investigated ([Supplementary Table S4](#)). For CV- phecodes, we identified 112 local

*Shared genetics of PTSD and cardiovascular disease*

genetic correlations with PTSD across 33 loci (FDR  $q < 0.05$ ; Figure 2, [Supplementary Table S5](#)). Among these, 67 were related to circulatory system, and 45 to endocrine/metabolic phenotypes. Additionally, four PTSD-associated loci presented local genetic correlations between PTSD and 14 heart imaging traits (FDR  $q < 0.05$ ; Figure 2, [Supplementary Table S5](#)). For LE8- factors, 92 local genetic correlations with PTSD were identified across 44 loci (Figure 2, [Supplementary Table S5](#)). Notably, fat dietary intake was the only LE8- trait that was not genetically correlated with PTSD at any of the investigated loci. Overall, most local genetic correlations were positive. Among the few negative local genetic correlations, four were between PTSD and total cholesterol across different loci and six at 15q26.1 between PTSD and multiple phenotypes (Figure 2, [Supplementary Table S5](#)).

Considering locus-specific results, the 17q21.31 region exhibited the highest number of genetically correlated traits ( $N=21$ ; Figure 2, [Supplementary Table S5](#)), including 10 CV-related phenotypes (e.g., cardiac dysrhythmias, nonrheumatic aortic valve disorders, diabetes mellitus, overweight, and hypothyroidism) and 11 heart imaging traits (e.g., various sections of myocardial-wall thickness at end-diastole and ascending aorta minimum area).

Shared genetics of PTSD and cardiovascular disease

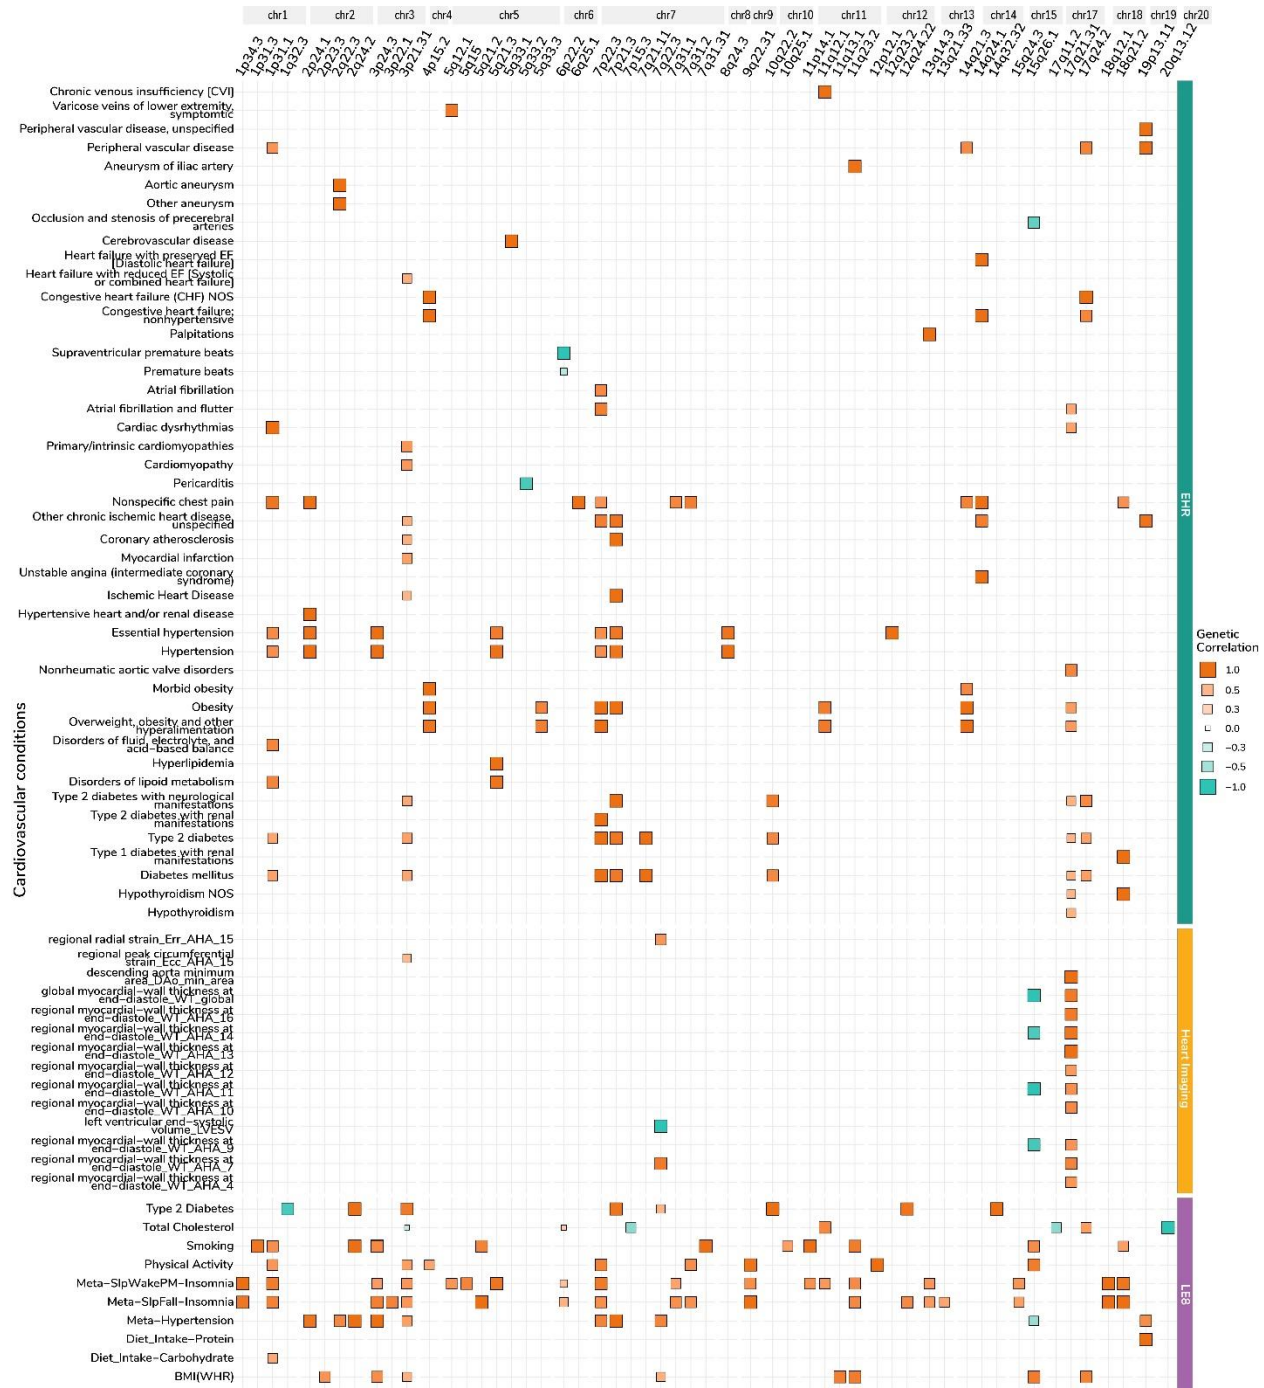

**Figure 2: Local Genetic Correlation between PTSD and CV conditions:** Matrix plot of local genetic correlation between PTSD and conditions grouped by their CV category (left y-axis); the EHR-based CV definitions (i.e., phecodes) are from Million Veteran Program. The x-axis shows loci as cytobands grouped by chromosomes. The positive correlation is denoted in orange, cyan indicates negative correlation, and the size of the squares corresponds to the magnitude of the genetic correlation.

## 3.2 Shared causal variants between PTSD and CV conditions within genetically correlated loci

We investigated whether the local genetic correlation between PTSD and CV-related phenotypes is due to a shared causal variant or causal variants in linkage disequilibrium (colocalization hypotheses H4 and H3, respectively)<sup>52</sup>. Our colocalization investigation identified 20 CV-related phecodes that shared the same causal SNP with PTSD across 11 loci (H4-PP  $\geq$  80%, [Figure 3A](#); [Supplementary Table S6](#)) and 19 CV diagnoses for which causal variants were in LD with PTSD variants (H3-PP  $\geq$  80%, [Figure 3A](#); [Supplementary Table S6](#)). To replicate the colocalization findings observed using MVP phecodes, we repeated the analysis using UKBB phecodes and other cohorts which incorporate a combination of EHR and self-report definitions. Specifically, we matched 24 CV phecodes in UK Biobank (N=420,531)<sup>44</sup> and 11 GWASs from major consortia comprising of self-reported and/or clinical data (N $\sim$ 1,320,016)<sup>27-33</sup>. In UKBB, 13 out of the 24 examined traits displayed replications (H4/H3-PP  $\geq$ 70%), revealing consistent colocalization patterns with PTSD across 8 loci ([Supplementary Table S6](#)). In the other cohorts, validation was achieved for 5 phenotypes (i.e., myocardial infarction, coronary artery disease, atrial fibrillation, type 2 diabetes, and BMI) across 8 distinct loci (H4/H3-PP  $\geq$ 70%; [Supplementary Table S6](#)). Across discovery (in MVP) and replication (in UKBB and other cohorts), obesity and being overweight demonstrated the highest posterior probability of sharing the same causal variant with PTSD in locus 4p15.2 (H4-PP=1, a shared causal SNP - rs34811474 - *ANAPC4*).

Among the heart imaging traits, there was colocalization on two loci for 8 traits. Within locus 17q21.31, PTSD-variants were in LD with causal variants related to seven different levels of measurements of regional myocardial-wall thickness at end-diastole, and the global myocardial-wall thickness at end-diastole (H3-PP $\geq$ 80.0%). In locus 15q21.31, PTSD and the global myocardial-wall thickness at end-diastole share the same causal trait (H4-PP=92.5%, causal SNP - rs17514846- *FURIN*).

Considering LE8 checklist, we observed statistically significant PTSD colocalization (H4/H3  $\geq$ 80%) in 31 loci ([Figure 3A](#); [Supplementary Table S6](#); [Supplementary Figure S1](#)). While no colocalization was observed between PTSD and dietary carbohydrate intake, the other LE8-related phenotypes shared the same PTSD casual SNP in 20 loci collectively (H4-PP  $\geq$ 80%; closest gene (shared causal variant), *ANAPC4* (rs34811474), *ARHGAP15* (rs10191758), *BPTF* (rs34872586), *CDH2* (rs7243332), *FOXP2* (rs1476535, rs8180817), *IP6K1* (rs11130221), *KMT2E* (rs2470937), *LSM4* (rs7408312), *MAD1L1* (rs34809719), *NCAM1* (rs7106434), *NCOA5* (rs6032660), *PDE4B* (rs2310819), *PLCL2* (rs748832), *PROX1* (rs340874), *SATB1*(rs4269101), *TANK* (rs197261), *TMEM106B* (rs13237518), non-coding regions (rs11581459, rs325500, rs4275621)) [Supplementary Table S6](#); [Supplementary Figure S1](#)). Interestingly, physical activity shared the same causal variant with PTSD in locus 4p15.2 (H4-PP=99%) that we observed with respect to obesity and being overweight (shared causal SNP - rs34811474 - *ANAPC4*). Both total cholesterol and BMI-adjusted-waist-to-hip ratio had the highest posterior probability of having causal variants in LD with PTSD-associated SNPs in 6p22.2 and 3p21.31, respectively (H3-PP=100%, [Supplementary Table S6](#); [Supplementary Figure S1](#)).

Overall, 17q21.31 and 3p21.31 regions exhibited the highest number of CV-related phenotypes ([Figure 3B](#)). Specifically, 17q21.31 showed colocalization of PTSD with seven CV phecodes and

Shared genetics of PTSD and cardiovascular disease

eight heart imaging phenotypes, while 3p21.31 colocalized PTSD with eight CV phecodes and six phenotypes related to LE8 checklist.

A.

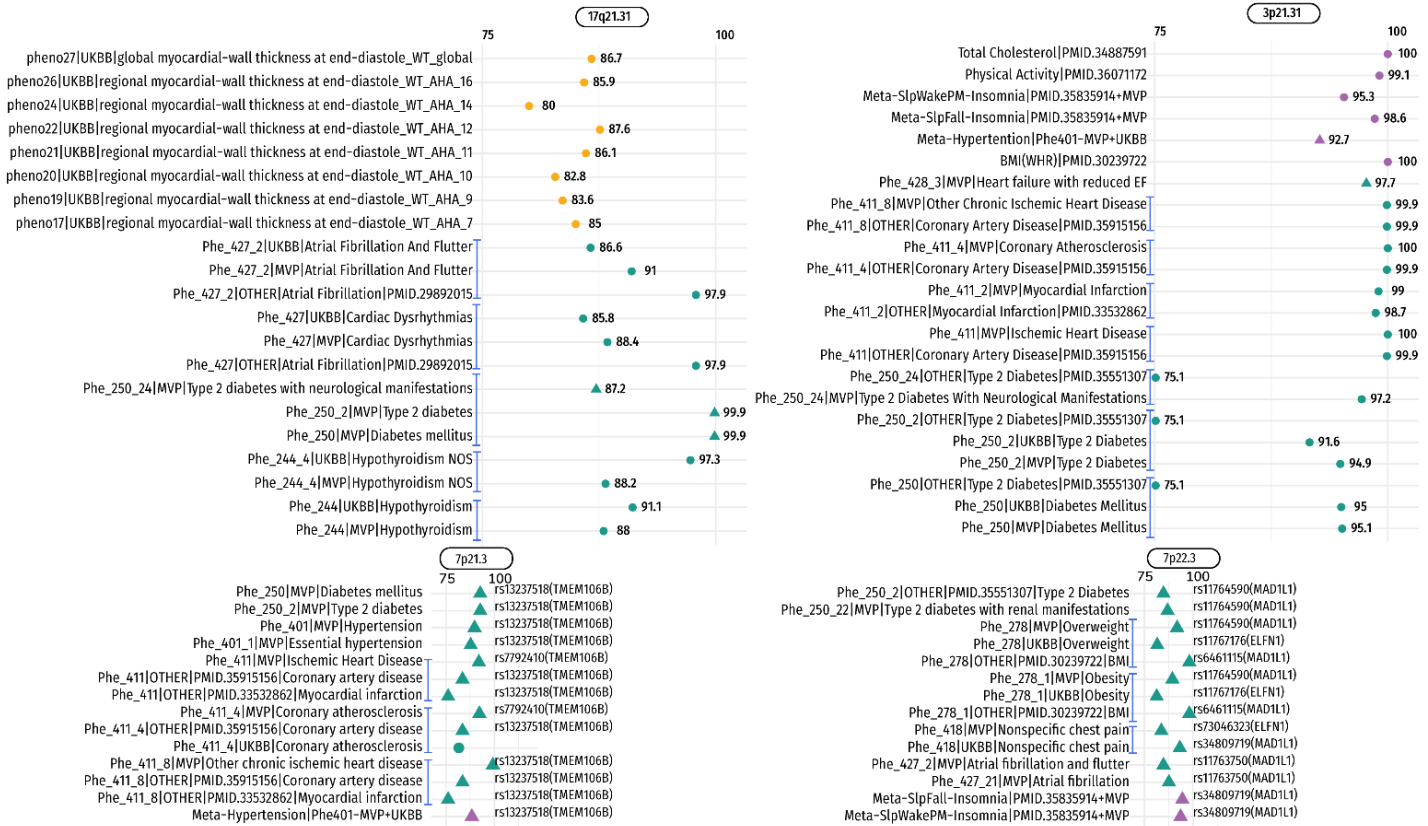

### Shared genetics of PTSD and cardiovascular disease

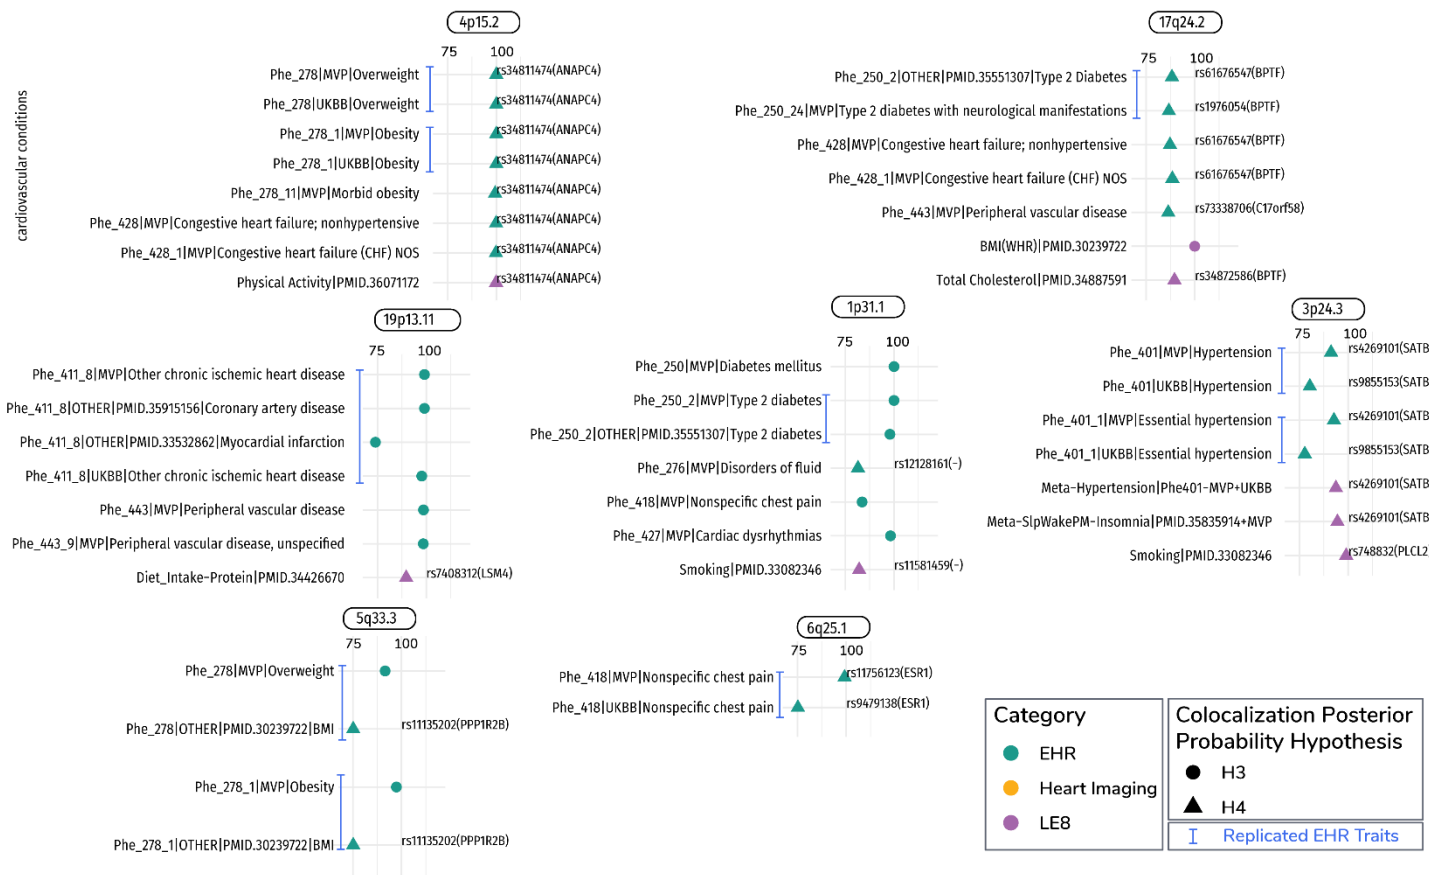

### B.

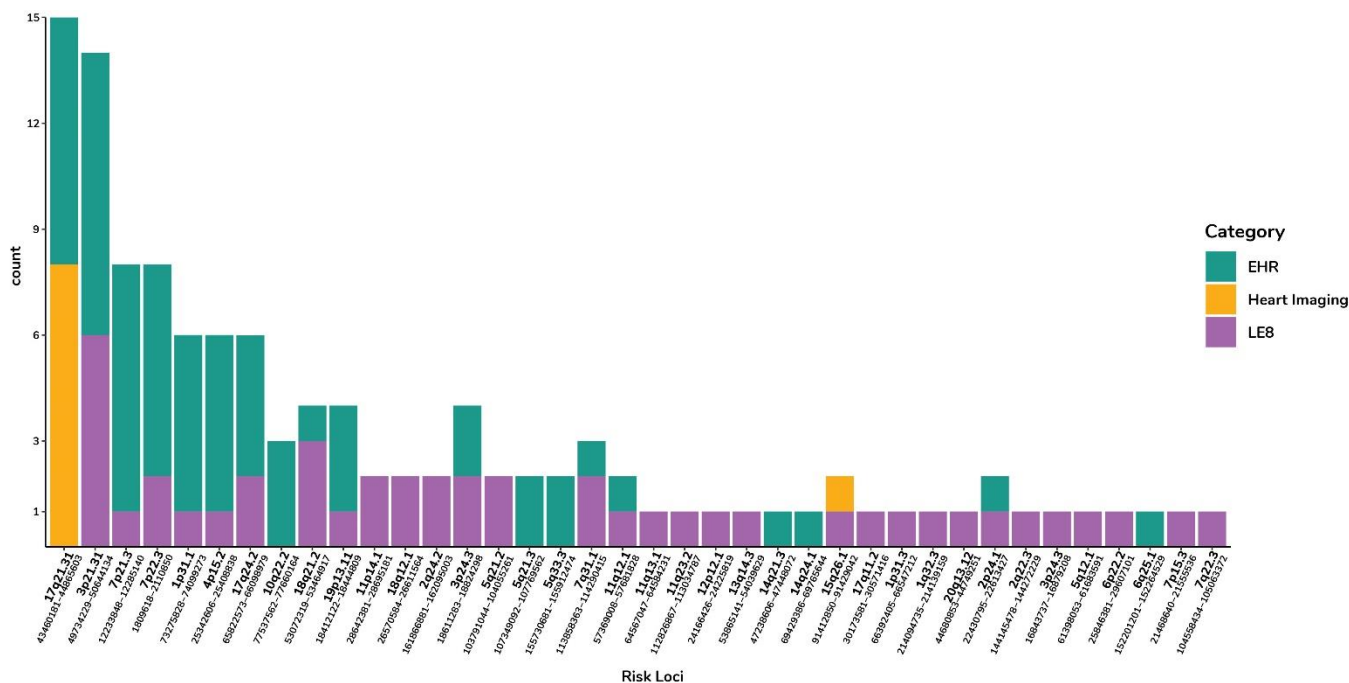

**Figure 3: Shared causal variants between PTSD and CV conditions:** A) *Top*. The x-axis shows colocalization probability (different LD-linked causal variants-H3 hypothesis; same causal variant – H4 hypothesis), and y-axis is marked with CV conditions. between PTSD and CV conditions based on colocalization. A subset of 11 loci that replicated for EHR-derived diagnosis are indicated with a blue line. The shared causal variants based on H4 hypothesis are labelled and their nearest genes are in parenthesis. We highlight genes at each locus that had colocalization evidence with molecular profiles (gene/splicing/proteome expression) and CV conditions (Supplementary Table S7); B) *Bottom*. A stacked bar plot showing number of traits (y-axis) observed at each locus, marked as cytoband and position range in base pairs (x-axis). The traits are grouped into three CV categories.

To prioritize genes within the colocalized regions, we first identified 506 genes physically located in the 38 loci that showed evidence of colocalization between PTSD and CV conditions. We leveraged multi-tissue molecular profiles (gene, proteome, and splicing expression) and CV traits available from OpenTargets platform<sup>51, 53</sup>. We identified 270 genes that had H4 or H3 hypothesis probability  $\geq 0.6$  of colocalizing with 201 different CV conditions across 124 tissues. Among the highest H4 associations (H4-PP=100%), there were multiple phenotypes related to the body electrical impedance, BMI, blood lipids, blood pressure, hemoglobin A1c in multiple tissues, smoking, sleep duration, and hypothyroidism. (Supplementary Table S7).

### 3.3 Observational association of PTSD with CV-related diagnoses in All Of US cohort

To further investigate the comorbidity between PTSD, and 13 CV diagnoses observed in our genetically informed analysis, we conducted an observational analysis using EHR data for circulatory and metabolic diagnoses from AoU cohort (as per phecodes: 244-hypothyroidism, 244.4-hypothyroidism NOS, 250-diabetes mellitus, 250.2-Type 2 diabetes, 278-Overweight, obesity, and hyperalimentation, 278.1-obesity, 401-hypertension, 401.1-essential hypertension, 411.8-other chronic ischemic heart disease, 418-nonspecific chest pain, 427-Cardiac dysrhythmias, 427.2 atrial fibrillation and flutter, and 411.4-coronary atherosclerosis)).

Specifically, we tested the association of PTSD (13,877 cases) with 13 CV diagnoses (Supplementary Table S8) considering three adjustment models: i) base-model (covariates:- age, sex, and self-reported race); ii) SES-model (base-model covariates and deprivation index, smoking, and BMI), iii) depression-model (SES-model and depression diagnosis-[phecode 296.2]). PTSD was significantly associated with all 13 CV phecodes across all three models ( $p < 5.15 \times 10^{-6}$ ; Supplementary Table S8). However, while there was no difference between the estimates obtained from base and SES-models, we observed a reduction in effect sizes observed in the depression model compared to the base model ranging from 84% for chronic ischemic heart disease (odds ratio, OR= 2.61 vs 1.41, p-difference= $5.44 \times 10^{-19}$ ) to 48% for hypothyroidism (OR= 1.78 vs 1.2, p-difference= $5.7 \times 10^{-25}$ ). Nevertheless, the effect sizes observed accounting for depression comorbidity confirm the relationship linking PTSD to CV-related traits.

### 3.4 Tissue Enrichment for PTSD, CV diagnoses, heart imaging and LE8 traits

To gain biological insights into PTSD and CV conditions, we further employed in-silico genetic approaches to identify tissues that might overlap due to similar gene expression profiles. We limited our analyses to CV traits that showed multiple levels of evidence for genetic overlap: 13 CV diagnoses (meta-analyzed between UKBB and MVP), 8 heart imaging traits and eight LE8 traits.

Tissue enrichment test systematically models tissue-specific gene expression data and GWAS of trait, prioritizing disease specific causal tissues. We identified 6 tissues that are enriched based on gene expression in PTSD: the limbic system ( $p=4 \times 10^{-6}$ ), the cerebral cortex ( $p=6 \times 10^{-5}$ ), the brain ( $p=4 \times 10^{-6}$ ), the entorhinal cortex ( $p=4 \times 10^{-4}$ ), the hippocampus ( $p=10^{-3}$ ), and the brain cortex ( $p=9 \times 10^{-4}$ ). These tissues were not FDR significant in other traits, but were nominally significant for nonspecific chest pain, overweight, 'overweight, obesity and other hyperalimentation', physical activity, smoking, diet intake proportion of protein, and insomnia (SlpFall- difficulty in falling asleep, and SlpWakePM-difficulty in falling asleep after waking up in the middle of the night) ( $p < 0.05$ ; [Supplementary table S10](#); [Supplementary Figure S2](#)). No heart imaging trait remained significant in the multi-tissue enrichment analysis.

### 3.5 Proteome-Wide Association Study (PWAS): integrating genetic variants from GWAS and proteome expression in brain and blood tissues

PWAS studies combine effect-estimate of genetic variants on diseases, and abundance or expression of proteins, thereby prioritizing genes that may be associated with disease/traits via altered proteome expression. We tested gene-associations leveraging genetically regulated proteome expression in dIPFC and blood with respect to PTSD and phenotypes highlighted by local genetic correlation and colocalization analyses. This included 13 CV phecodes, seven heart imaging traits, and LE8 factors. To maximize statistical power, we meta-analyzed GWAS of each of the 13 CV diagnoses from MVP and UKBB to improve statistical power for gaining insights into overlapping mechanistic pathways [N total = 865,527]. Details regarding each meta-analyzed CV diagnosis are available in [Supplementary Table S9](#). Leveraging weights derived from dIPFC-specific pQTLs, we identified 122 genes associated with both PTSD and CVD phenotypes (FDR  $q < 0.05$ ; [Figure 4](#), [Supplementary Table S11](#)). The majority of these PTSD associations were shared with LE8 factors (N=109). Several genes demonstrated proteomic associations across CV phecodes, heart imaging phenotypes, and LE8 factors (e.g., *ATG7*, *CCDC92*, *CNNM2*, *DNM1*, *FAM134A*, *SIRPA*, *SNX32*, and *TROIM47*). Other pleiotropic genes included *CCDC92*, *SIRPA* and *LRRC37A2* that were associated with PTSD and 20 or more CV-related phenotypes ([Supplementary Table S11](#)). The strongest proteome-wide association with PTSD was observed with *ICA1L* ( $Z=6.89$ ,  $p=5 \times 10^{-12}$ ) that was also associated with several CV phecodes such as atrial fibrillation ( $Z=2.9$ ,  $p=4 \times 10^{-59}$ ), coronary atherosclerosis ( $Z=16.2$ ,  $p=5 \times 10^{-50}$ ), and T2D [EHR-MVP+UKBB] ( $Z=3.87$ ,  $p=1.07 \times 10^{-4}$ ). While these associations were positively related to increased *ICA1L* proteomic expression, we also observed an inverse relationship with total cholesterol ( $Z=-18.86$ ,  $p=2 \times 10^{-79}$ ), insomnia ( $Z=-6.03$ ,  $p=2 \times 10^{-9}$ ), physical activity ( $Z=-3.41$ ,  $p=6 \times 10^{-4}$ ), and smoking ( $Z=-4.85$ ,  $p=10^{-6}$ ). The strongest inverse association with PTSD was *KHK* ( $Z=-6.86$ ,  $p=7 \times 10^{-12}$ ), which was also negatively associated with several other phenotypes, such as T2D



( $Z=-5.22$ ,  $p=2\times 10^{-7}$ ), hypertension ( $Z=-4.59$ ,  $p=4\times 10^{-6}$ ), unspecified chronic ischemic heart disease ( $Z=-4.04$ ,  $p=5\times 10^{-5}$ ), hypothyroidism ( $Z=-3.94$ ,  $p=8\times 10^{-5}$ ) protein intake ( $Z=-3.84$ ,  $p=10^{-4}$ ), coronary atherosclerosis ( $Z=-3.82$ ,  $p=10^{-4}$ ), and nonspecific chest pain ( $Z=-3.32$ ,  $p=9\times 10^{-4}$ ). *KHK* was positively associated with BMI ( $Z=3.49$ ,  $p=5\times 10^{-4}$ ) and LE8-T2D ( $Z=3.56$ ,  $p=4\times 10^{-4}$ ). Total cholesterol demonstrated the highest number of overlapping genes with PTSD, with 56 genes overlapping in the brain proteome including genes with the highest effect estimate such as *PLCG1* ( $Z = -18.349$ ,  $p=3.37\times 10^{-75}$ ).

Leveraging blood-proteome expression from two different studies (ARIC, and UKBB-PPP), we identified 33 genes associated with both PTSD and at least one or more of the 13 CV diagnoses, 8 heart imaging traits, and LE8 factors investigated ([Supplementary Table S11](#)). The strongest positive association with PTSD was *FES* ( $Z=6.15$ ,  $p=8\times 10^{-10}$ ), which was also positively associated with smoking ( $Z=5.95$ ,  $p=3\times 10^{-9}$ ) and physical activity ( $Z=4.19$ ,  $p=3\times 10^{-5}$ ). *FES* proteomic expression exhibited negative associations with essential hypertension ( $Z=-9.92$ ,  $p=3\times 10^{-23}$ ), unspecified chronic ischemic myocardial disease ( $Z=-8.51$ ,  $p=2\times 10^{-17}$ ), and global myocardial wall-thickness at end-diastole ( $Z=-4.08$ ,  $p=5\times 10^{-5}$ ). The strongest negative association with PTSD was observed with *CD40* ( $Z=-5.27$ ,  $p=10^{-7}$ ), which was also negatively associated with atrial fibrillation and flutter ( $Z=-3.73$ ,  $p=2\times 10^{-4}$ ) and positively associated with total cholesterol ( $Z=7.17$ ,  $p=8\times 10^{-13}$ ). Considering both blood and dIPFC, *SIRPA*, *MANF*, and *POR* exhibited cross-tissue proteome-wide associations with PTSD and CVD traits ([Supplementary Table S11](#)).

By comparing genes prioritized from colocalized regions and genes identified from PWAS, we identified 403 distinct genes with 17 overlapping between the two methods: *BTN2A1*, *BTN3A2*, *C3orf18*, *CACNA2D2*, *CD40*, *DAG1*, *FES*, *FURIN*, *GMPPB*, *GPX1*, *HYAL1*, *LRRC37A2*, *MST1*, *NCAM1*, *SEMA3F*, *SERPING1*, *UBE2L6*.

### 3.6 Pathway Enrichment

Considering genes identified by the tissue-specific PWAS, we identified 25 pathways overrepresented by the PTSD&CV proteome-wide significant genes in the dIPFC and 36 pathways in the blood ([Supplementary Table S12](#)). Among the dIPFC PWAS genes, in addition to basic cellular functions ([Supplementary Figure S3](#); [Supplementary Table S12](#)), we observed metabolic and calcium modulating pathways: “oxidoreductase activity, acting on the CH-OH group of donors, NAD or NADP as acceptor” (FDR P-value =  $3.92\times 10^{-2}$ ), “Calmodulin-induced events” (FDR P-value =  $3.97\times 10^{-2}$ ), the “CaM pathway” (FDR P-value =  $3.97\times 10^{-2}$ ), and “Ca-dependent events” (FDR P-value =  $4.95\times 10^{-2}$ ). Among the pathways overrepresented by the plasma PWAS genes, in addition to biological and cellular processes ([Supplementary Figure S4](#); [Supplementary Table S12](#)), we observed several immune and neuronal processes Such as “response to stimulus” (FDR P-value=  $5.84\times 10^{-4}$ ), “regulation of immune response” (FDR P-value =  $4.98\times 10^{-3}$ ), “regulation of immune system process” (FDR P-value =  $7.33\times 10^{-3}$ ), “regulation of response to stimulus” (FDR P-value= 0.011), neuron projection development (FDR P-value= 0.014).

### Shared genetics of PTSD and cardiovascular disease

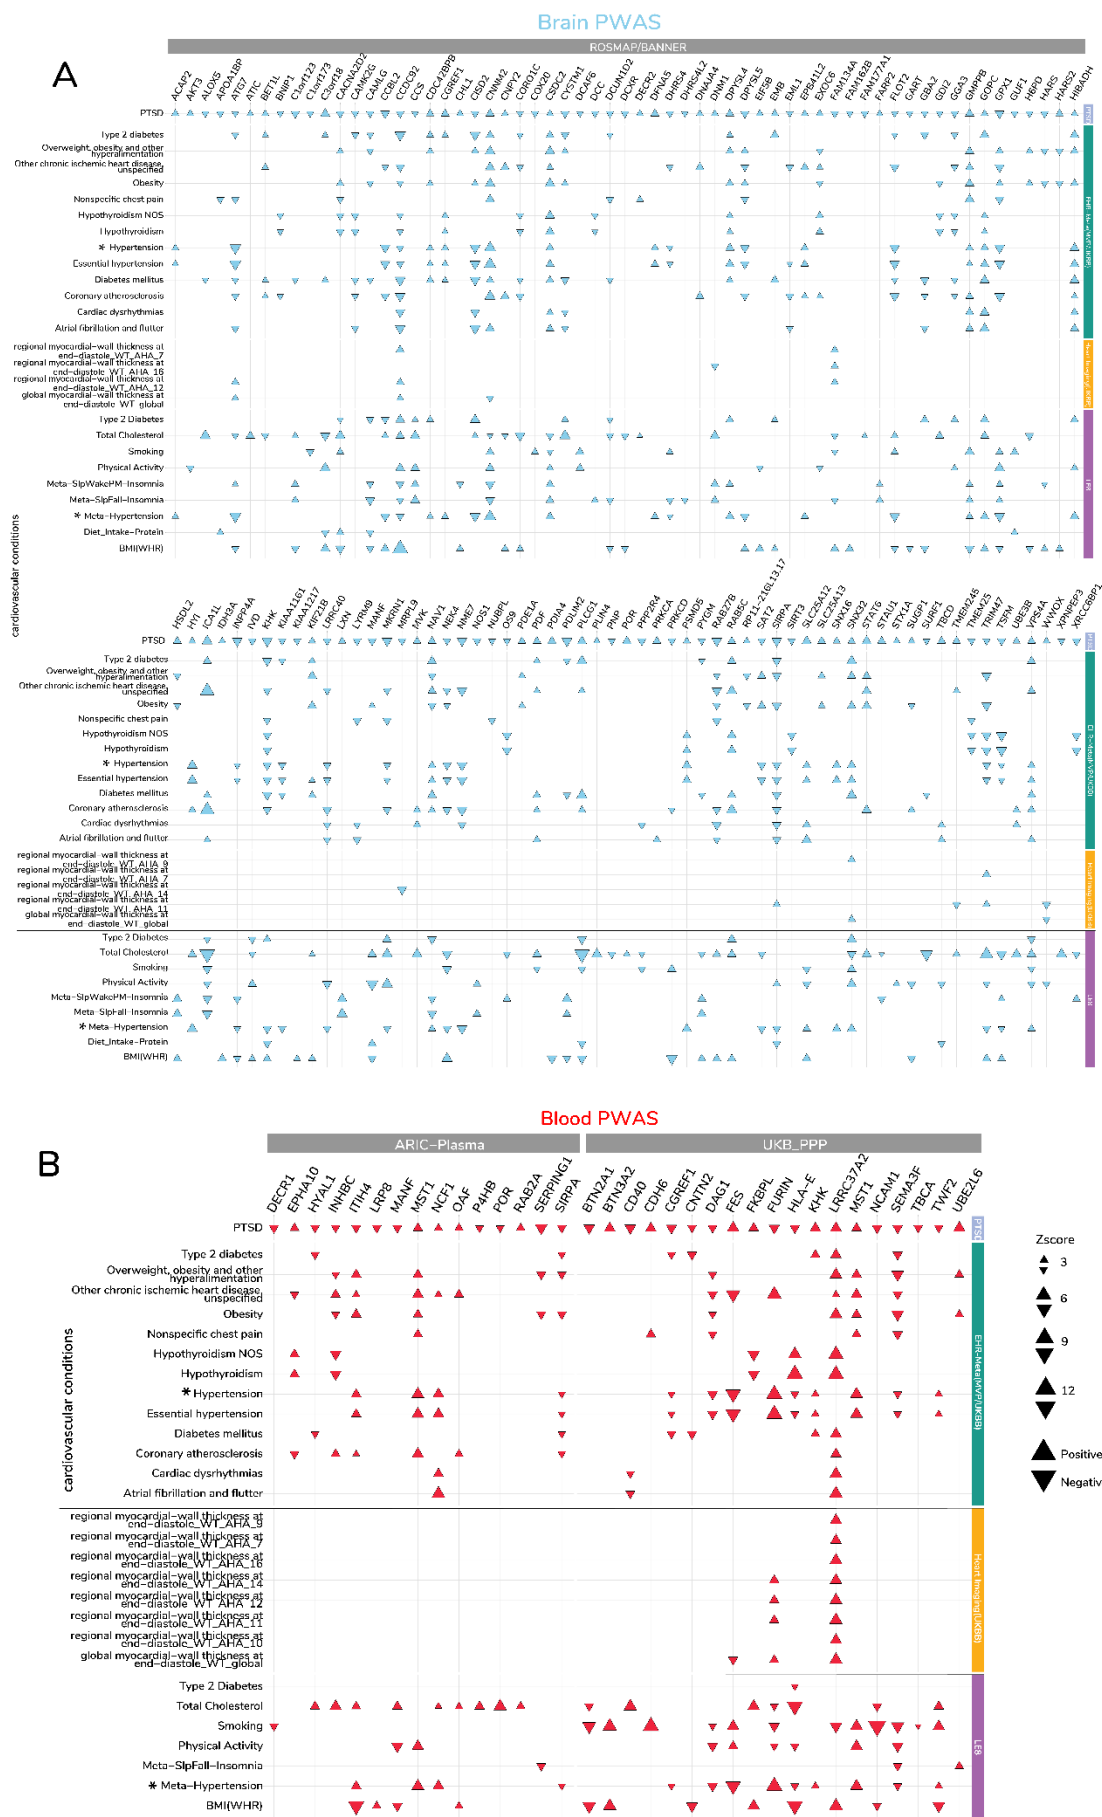

**Figure 4: Shared genes and pathways between PTSD and CV conditions based on proteome-wide associations:** Distribution of z-scores across significant PWAS genes between PTSD and CV conditions using A) brain proteome in blue and B) blood proteome in red. Genes are grouped based on two blood-based proteome panels/brain-based panel (y-axis) and respective CV conditions (x-axis). Significant genes are shown as red (blood) or blue (brain) triangles, wherein triangles facing up and down represent positive and negative z-scores, respectively.

### 3.7 Drug repurposing in research context

To contextualize the role of reported shared genes between PTSD and CV conditions, we performed a prototype approach. We identified drugs that target these shared genes. We then analyzed if any of these drugs have common gene targets, and categorized their adverse effects into cardiovascular or psychiatric side effects. This approach helps us see how these shared genes might influence both types of conditions and the potential risks and benefits of the drugs involved.

We identified 74 approved drugs targeting 30 genes that either designated for psychiatric (as a range of psychiatric drugs can be used for treating PTSD and associated symptoms) or cardiovascular conditions ([Supplementary Table S13](#), [Figure 5](#)). Looking at gene target that overlap between psychiatric and CV conditions, we found *DRD2*, *GFAP*, *POR* and *NOS1* to be targets of several CV conditions including hypo/hypertension, diabetes, cholesterol and heart failure. Only Prazosin, an alpha-1 adrenergic receptor antagonist was the only drug that is known to treat hypertension, and has off-label benefit for PTSD-associated nightmares<sup>60, 61</sup>.

We also investigated adverse effects of these drugs, and among the 45 psychiatric drugs most cardiovascular-system-related adverse effects included increased weight or weight fluctuations, tachycardia and QT prolongation, which indicates a disturbance in heart ventricle chamber signal transmission<sup>62</sup>. Other CV adverse effects of the psychiatric drugs include blood glucose increase, diabetes, orthostatic hypotension, and dyslipidemia.

Conversely, among the 30 CVD drugs, adverse psychiatric effects were less observed, and included depression, suicide attempt, cognitive disorder, and hallucination. ([Supplementary Table S14](#)).

## Shared genetics of PTSD and cardiovascular disease

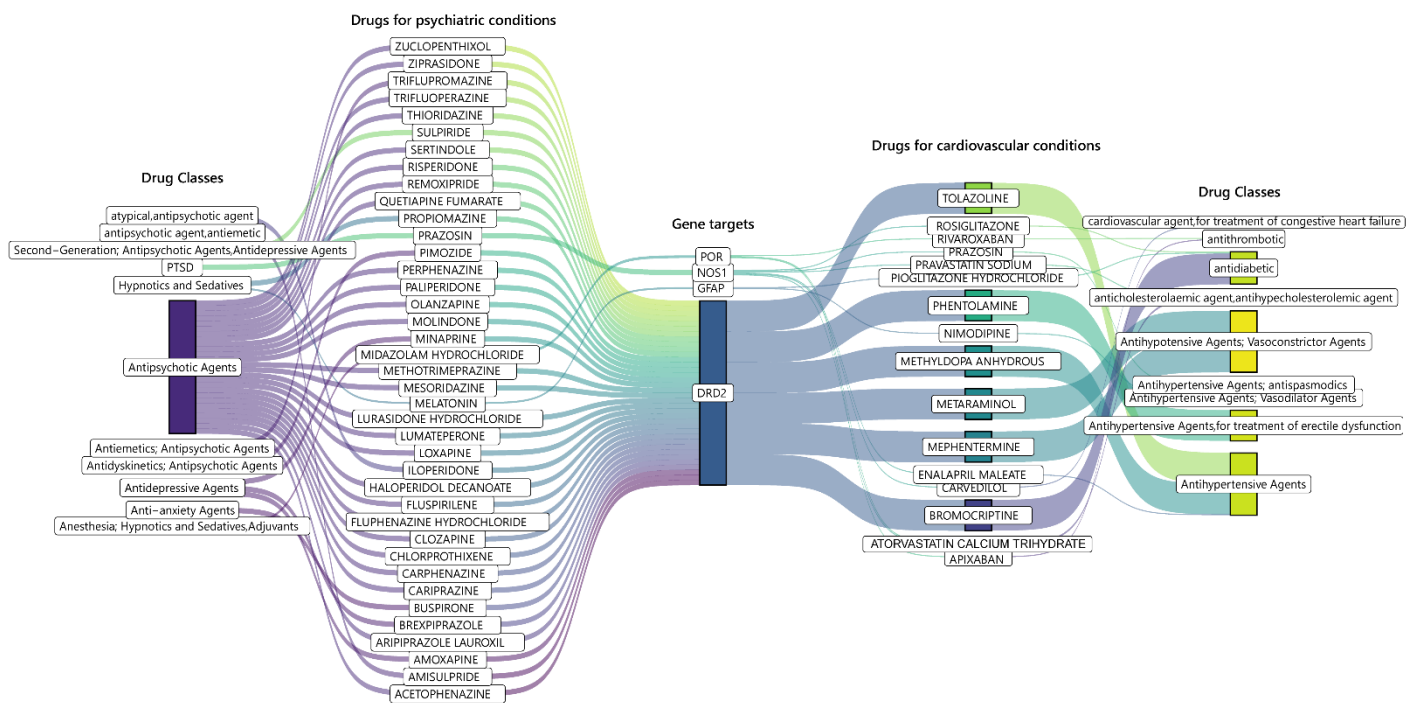

**Figure 5: Comparing common drugs and their gene-targets between PTSD and CV conditions:** This Sankey plot shows the psychiatric drugs and their classes (first & second panel) that target genes – *DRD2*, *GFAP*, *POR* and *NOS1* (third panel), which are also targeted by CV drugs (third panel) and their corresponding CV categories (fourth & fifth panel) (see Supplementary Tables for more details).

## 4 DISCUSSION

To our knowledge, we provide the first comprehensive study assessing the genetic overlap between PTSD and CV phenotypes in more than 1 million individuals, integrating multi-omics information with EHRs, functional and structural cardiac imaging measurements, and CV health factors. We report causal variants for CV diagnoses and imaging traits that are shared with PTSD, while CV health behaviors as per AHA's LE8 show a broader genetic overlap across several loci. Among the EHR CV traits, colocalization analyses of discovery and replication cohorts indicated loci 3p21.31, 17q21.31, 7p22.3, and 7p21.3 as potential PTSD-CVD pleiotropy hotspots. Specifically, loci 3p21.31 and 17q21.31 exhibited different LD-linked causal variants, while loci 7p22.3 (*MADIL1*, *ELFN1*) and 7p21.3 (*TMEM106B*, *VWDE*, *THSD7A*) had the greatest number of causal variants shared between PTSD and multiple CV conditions (e.g., hypertension, diabetes, coronary artery disease, obesity/overweight, atrial fibrillation, and non-specific chest pain). Although some of these loci have been identified in the context of psychiatric disorders<sup>63-65</sup>, we additionally observed genes at these loci also colocalize between multi-tissue molecular profiles of several cardiovascular traits, highlighting their significant role as a potential common denominator to PTSD and CV conditions. Often genetic data is proxy for diagnostic risk, and mirrors association, but is limited in adjusting for additional confounders without losing statistical power. We confirmed the specificity of PTSD-CV genetic relationships using epidemiological observation from EHR data of 249,906 AllofUS participants. We observed that PTSD diagnosis

### Shared genetics of PTSD and cardiovascular disease

is associated with 13 CV diagnoses (identified using genetic data from MVP EHR data and replicated in UKBB EHRs), even after accounting for smoking, BMI, deprivation index, and depression diagnosis. Interestingly, 4 of the 13 diagnoses overlap with CV health factors from the LE8 traits – type 2 diabetes, obesity, overweight, and hypertension, which is parallel to genetic study of ideal cardiovascular health based on LE 7<sup>66</sup>.

To identify potentially actionable gene targets that overlap between PTSD and CV conditions, we leveraged the cumulative effect of genetic variants on protein expression. We identified twice as many genes using brain-based proteome expression weights than with blood. We also observed interesting relationships, such as total cholesterol demonstrating negative genetic correlation with PTSD at multiple loci, and almost half of the gene associations have opposite effect estimates between PTSD and total cholesterol. These observations may contribute to the abnormal total cholesterol reported in individuals with PTSD<sup>67</sup>. Additionally, we report many shared proteomic associations of PTSD and CVD to further identify underlying common disease mechanisms and therapeutic targets. Among them, *LRRC37A2* was related to the most CVD traits (N=20), followed by *MST1* (N=18). *LRRC37A2* has been associated with coronary artery disease<sup>68</sup>, cardiorespiratory fitness<sup>69</sup>, and thyroid function<sup>70</sup>. *MST1* activation has been linked to the pathogenesis of cardiovascular and metabolic diseases<sup>71</sup> while its downregulation in the hippocampus appears to be protective in the context of stress-related mental health conditions (e.g. PTSD)<sup>72</sup>. *NCAM1* showed the most statistically significant proteomic association with smoking. This is in line with previous evidence linking this locus to smoking<sup>73</sup>. Other PTSD-CV shared genes with supporting evidence from previous CV studies included *TMEM106B*<sup>74-76</sup>, *MAD1L1*<sup>77, 78</sup>, *SATB1*<sup>79</sup>, *PLCL2*<sup>80</sup>, *FURIN*<sup>81, 82</sup>, *FOXP2*<sup>83</sup>, *ESR1*<sup>84</sup>, and *CNNM2*<sup>85</sup>. Pathway enrichment analyses highlighted different blood vs. brain patterns. Specifically, genes identified by the blood-based PWAS were enriched for immunological and neuronal processes, while the brain-based PWAS genes were related to carbohydrate metabolism and calcium-modulating functions. These findings converge with previous hypotheses related to the role of immune-metabolic signaling<sup>86, 87</sup> and calcium dysregulation<sup>88-92</sup> in PTSD and CV pathogeneses.

The drug repurposing analyses identified *DRD2*, *GFAP*, *NOS1* and *POR* as common gene targets of several PTSD and CV drugs. Prazosin was common to PTSD and CV conditions, although with mixed results for alleviation of PTSD and related symptoms. Altered levels of *GFAP* expression are associated with PTSD<sup>93</sup>, and thrombotic injury to the vascular muscle leads to secretion of *GFAP*<sup>94</sup>. Furthermore, the drugs used for PTSD treatment we identified in our drug-gene-interaction analysis have reported adverse CV effects such as weight gain, weight changes, cardiac arrhythmia, abnormal blood pressure, and diabetes<sup>95, 96</sup>. *NCAM1* that colocalizes with BMI, is on the same locus as *DRD2* at 11q23.2, with both genes having molecular colocalization with insulin-like growth factor, blood pressure, and BMI. On the other hand, CVD drugs that exhibit psychiatric adverse effects such as depression, and cognitive dysfunction which have been associated with serotonergic<sup>97</sup>, and antidepressant response<sup>98-100</sup> respectively. These findings suggest a common role of the drugs in the two different diseases, where multiple mechanisms may be involved, either protective or detrimental.

While we provide a comprehensive assessment of the biology shared between PTSD and several CV conditions, our study has some limitations. Due to the well-known disparities in genetic research<sup>101</sup>, our analyses were limited to European ancestries, which do not allow generalization in all continental populations. We used MVP as the discovery cohort for EHR based CV diagnoses

due to its relatively low sample overlap with PTSD GWAS, this may have filtered out some loci that could have been identified with other cohorts as discovery. Additionally, veteran participants may not be representative of genetic profile identified from other (civilian) populations due to underlying demographic differences. While our observational analysis in the AllofUs cohort confirmed the PTSD-CV comorbidities in civilian cohort, further studies will be needed to verify the same for PTSD-CV shared loci identified in our molecular analyses. The drug-gene targets and subsequent mapping to PTSD and CV conditions is explained as an example to learn about role of gene drugs in therapeutic and adverse effects of drugs. The drugs mentioned were identified from research studies and may not reflect actual prescription practices and need further validation before we can make hypotheses regarding their impact on patients' implications. Pharmacovigilance data for gene-drug targets was extracted from a single source and may not be updated from research data or ongoing trials.

In conclusion, this study examines the shared biology of PTSD and CV health, leveraging large-scale molecular data and multi-modal information. Specifically, considering EHR diagnoses, cardiac imaging phenotypes, and cardiac health-related habits, we highlighted the local genetic correlations, proteomic and transcriptomic associations, and the potential pharmacological targets for molecular mechanisms underlying PTSD-CVD comorbidity. These findings converge on overlap in several domains across PTSD and CVD and within the context of the broader PTSD-CVD literature highlight important mechanisms relevant to potential pharmacological intervention warranting additional research.

## 5 DATA AVAILABILITY AND LINKS

---

- UCSC Genome Browser : <https://genome.ucsc.edu/cgi-bin/hgTables>
- DLPFC Proteome weights: <https://doi.org/10.7303/syn23627957>
- Open Targets: <https://genetics.opentargets.org/>
- Pan-UKBB Summary Statistics: <https://pan.ukbb.broadinstitute.org/>
- MVP Summary Statistics: [https://www.ncbi.nlm.nih.gov/projects/gap/cgi-bin/study.cgi?study\\_id=phs001672.v11.p1](https://www.ncbi.nlm.nih.gov/projects/gap/cgi-bin/study.cgi?study_id=phs001672.v11.p1)
- LAVA: <https://github.com/josefin-werme/LAVA>
- ARIC - plasma protein: <http://nilanjanchatterjeelab.org/pwas/>
- UKBB-PPP: <https://metabolomips.org/ukbbpgwas/>
- Phecode Map: <https://phewascatalog.org/>
- Meta-analyzed MVP-UKBB GWAS summary statistics of 14 traits: released at the time of publication.

## 6 ACKNOWLEDGEMENTS

---

This study was supported by grants from the National Institutes of Health (RF1 MH132337, R33 DA047527, and K99 AG078503), One Mind, the Alzheimer's Association (Research Fellowship AARF-22-967171), Horizon 2020 (Marie Skłodowska-Curie Individual Fellowship 101028810), Yale Women's Faculty Forum, and Suzhou Municipal Health Commission (LCZX202207). We also acknowledge the contribution of the participants and the investigators involved in the UK Biobank, the Million Veteran Program, the All of Us Research Program, and the Psychiatric Genomics Consortium. Major financial support for the PTSD-PGC was provided by the Cohen Veterans Bioscience, Stanley Center for Psychiatric Research at the Broad Institute, and the National Institute of Mental Health (NIMH; R01MH106595, R01MH124847, R01MH124851). The

All of Us Research Program is supported by the National Institutes of Health, Office of the Director: Regional Medical Centers: 1 OT2 OD026549; 1 OT2 OD026554; 1 OT2 OD026557; 1 OT2 OD026556; 1 OT2 OD026550; 1 OT2 OD 026552; 1 OT2 OD026553; 1 OT2 OD026548; 1 OT2 OD026551; 1 OT2 OD026555; IAA #: AOD 16037; Federally Qualified Health Centers: HHSN 263201600085U; Data and Research Center: 5 U2C OD023196; Biobank: 1 U24 OD023121; The Participant Center: U24 OD023176; Participant Technology Systems Center: 1 U24 OD023163; Communications and Engagement: 3 OT2 OD023205; 3 OT2 OD023206; and Community Partners: 1 OT2 OD025277; 3 OT2 OD025315; 1 OT2 OD025337; 1 OT2 OD025276.

## **7 COMPETING INTERESTS**

---

Dr. Polimanti reports a research grant from Alkermes outside the scope of this study. Drs. Polimanti and Gelernter are paid for their editorial work on the journal *Complex Psychiatry*. Dr. Gelernter is named as an inventor on PCT patent application no. 15/878,640 entitled “Genotype-guided dosing of opioid agonists,” filed January 24, 2018. Dr. Stein has in the past 3 years received consulting income from Actelion, Acadia Pharmaceuticals, Aptinyx, atai Life Sciences, Boehringer Ingelheim, Bionomics, BioXcel Therapeutics, Clexio, Delix Pharmaceuticals, EmpowerPharm, Engrail Therapeutics, GW Pharmaceuticals, Janssen, Jazz Pharmaceuticals, and Roche/Genentech; has stock options in Oxeia Biopharmaceuticals and EpiVario; and has been paid for editorial work on *Depression and Anxiety* (Editor-in-Chief), *Biological Psychiatry* (Deputy Editor), and *UpToDate* (Co-Editor-in-Chief for Psychiatry). Dr. O’Donnell an employee of Novartis Pharmaceuticals). Dr. Koller is the founder and CEO of EndoCare Therapeutics, but the company conducts research unrelated to the present study. The other authors declare no competing interests.

## 8 LEGENDS

**Supplementary Figure 1:** The x-axis shows colocalization probability (different LD-linked causal variants-H3 hypothesis; same causal variant – H4 hypothesis), and y-axis is marked with CV conditions. between PTSD and CV conditions based on colocalization. The shared causal variants based on H4 hypothesis are labelled and their nearest genes are in parenthesis. We highlight genes at each locus that had colocalization evidence with molecular profiles (gene/splicing/proteome expression) and CV conditions (Supplementary Table S7).

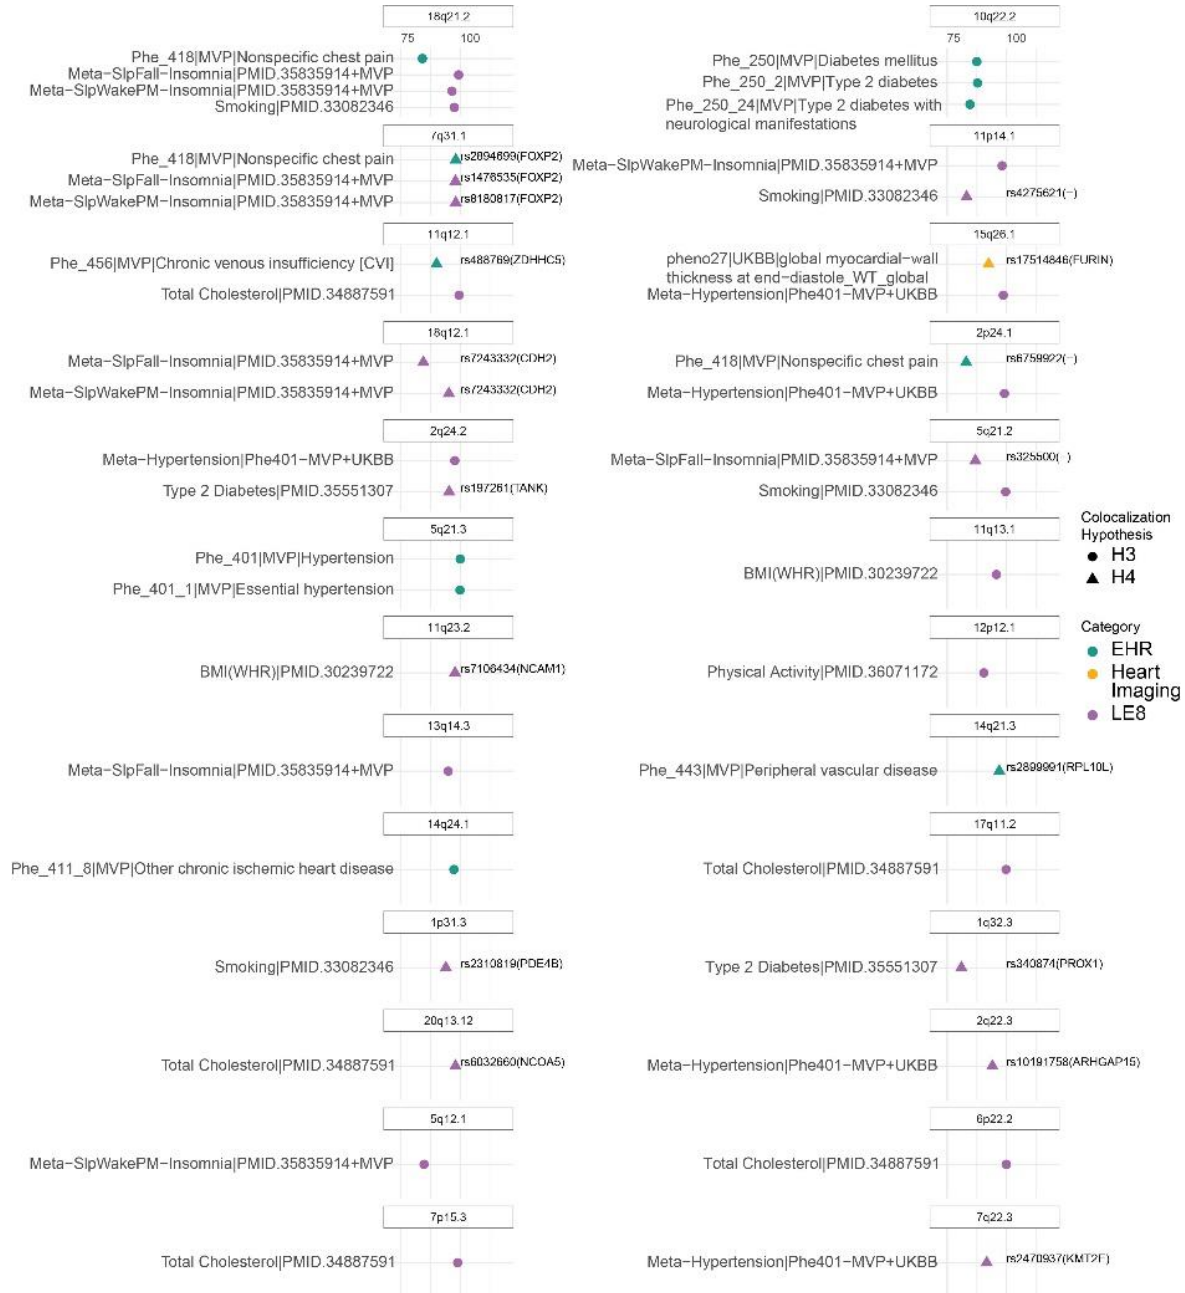



Shared genetics of PTSD and cardiovascular disease

**Supplementary Figure 2:** The matrix plot shows significant over-represented tissue based on genetically regulated gene expression profiles shared between PTSD and the CV conditions. The tissues are shown on the top x-axis, and traits are on the y-axis, grouped by category. LE8 – AHA’s Life’s Essential 8. Meta-analyzed phecodes from EHR of MVPandUKBB.

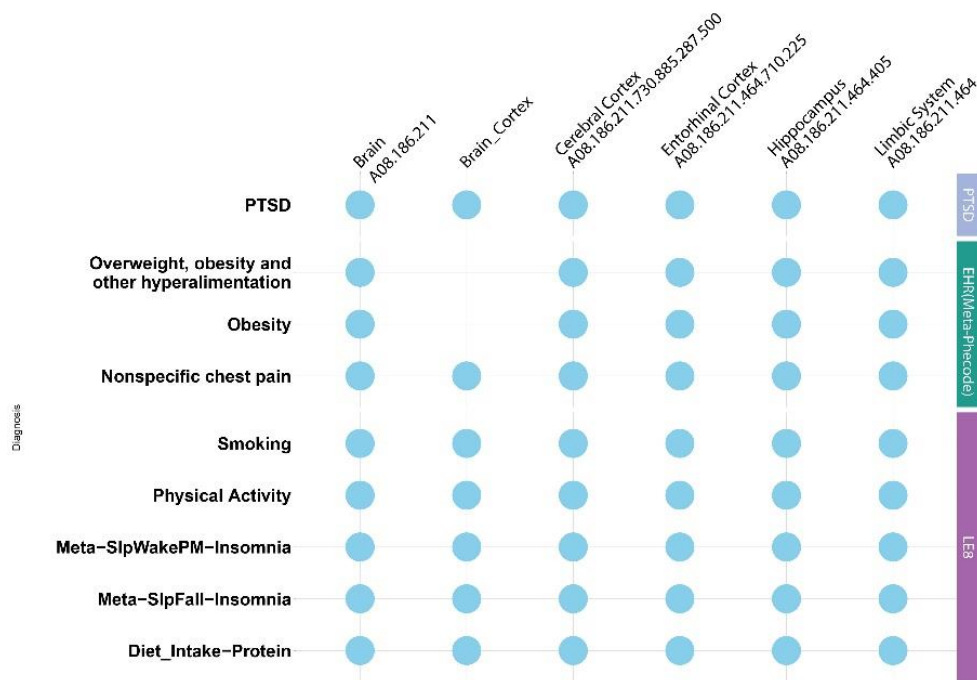

Shared genetics of PTSD and cardiovascular disease

**Supplementary Figure 3:** Bar plot showing pathway enrichment of genes overlapping between PTSD and CV conditions based on brain-based genetically regulated gene expression.

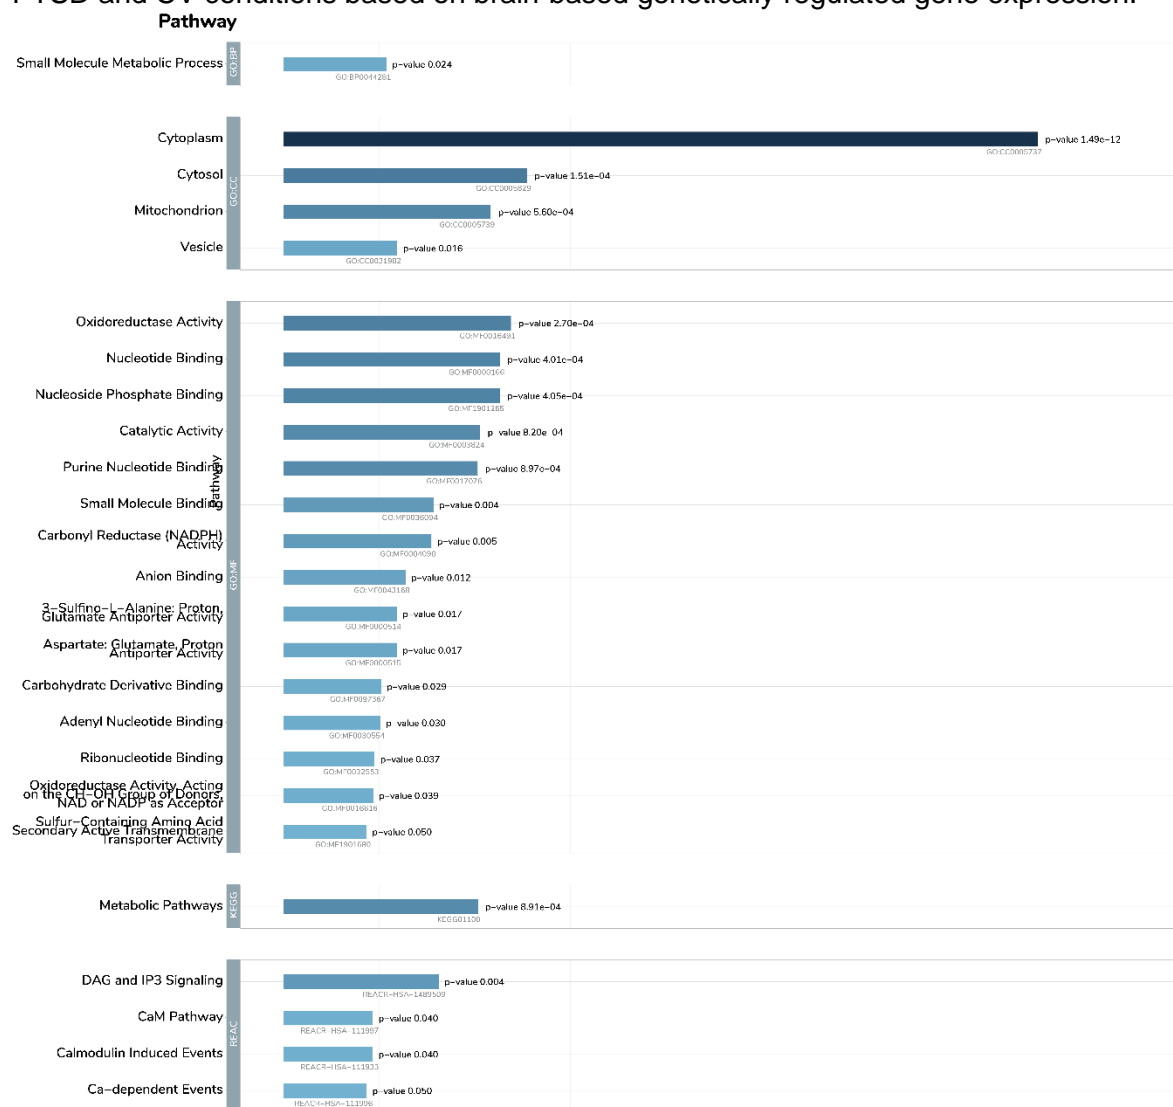

Shared genetics of PTSD and cardiovascular disease

Supplementary Figure 4: Bar plot showing pathway enrichment of genes overlapping between PTSD and CV conditions based on blood-based genetically regulated gene expression.

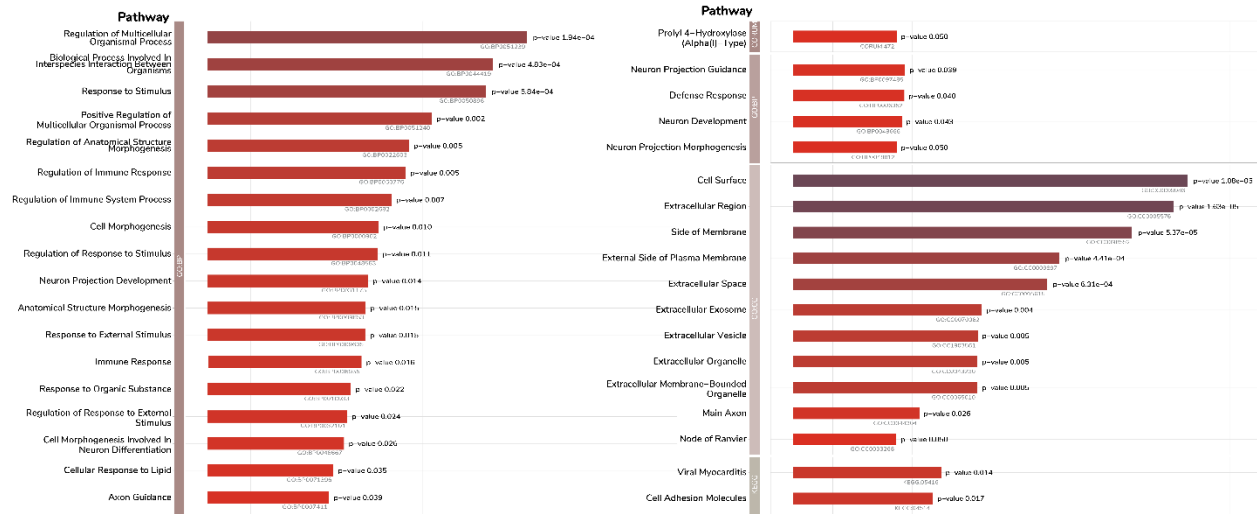

Supplementary Tables – See attached xls file.

## 9 REFERENCE

---

1. Vaduganathan M, Mensah GA, Turco JV, Fuster V and Roth GA. The Global Burden of Cardiovascular Diseases and Risk: A Compass for Future Health. *J Am Coll Cardiol*. 2022;80:2361-2371.
2. Lloyd-Jones DM, Allen NB, Anderson CAM, Black T, Brewer LC, Foraker RE, Grandner MA, Lavretsky H, Perak AM, Sharma G and Rosamond W. Life's Essential 8: Updating and Enhancing the American Heart Association's Construct of Cardiovascular Health: A Presidential Advisory From the American Heart Association. *Circulation*. 2022;146:e18-e43.
3. Polimanti R and Wendt FR. Posttraumatic stress disorder: from gene discovery to disease biology. *Psychol Med*. 2021;51:2178-2188.
4. Jacquet-Smailovic M, Brennstuhl M-J, Denis I, Kirche A, Tarquinio C and Tarquinio C. Relationship between Post-traumatic Stress Disorder and subsequent myocardial infarction: a systematic review and meta-analysis. *Journal of Affective Disorders*. 297:525-535.
5. Sumner JA, Kubzansky LD, Roberts AL, Gilsanz P, Chen Q, Winning A, Forman JP, Rimm EB and Koenen KC. Post-traumatic stress disorder symptoms and risk of hypertension over 22 years in a large cohort of younger and middle-aged women. *Psychol Med*. 46:3105-3116.
6. Scherrer JF, Salas J, Lustman PJ, van den Berk-Clark C, Schnurr PP, Tuerk P, Cohen BE, Friedman MJ, Norman SB, Schneider FD and Chard KM. The Role of Obesity in the Association Between Posttraumatic Stress Disorder and Incident Diabetes. *JAMA Psychiatry*. 75:1189.
7. Ebrahimi R, Lynch KE, Beckham JC, Dennis PA, Viernes B, Tseng C-H, Shroyer ALW and Sumner JA. Association of Posttraumatic Stress Disorder and Incident Ischemic Heart Disease in Women Veterans. *JAMA Cardiol*. 6:642.
8. Jordan HT, Stellman SD, Morabia A, Miller-Archie SA, Alper H, Laskaris Z, Brackbill RM and Cone JE. Cardiovascular disease hospitalizations in relation to exposure to the September 11, 2001 World Trade Center disaster and posttraumatic stress disorder. *J Am Heart Assoc*. 2:e000431.
9. Thurston RC, Jakubowski K, Chang Y, Wu M, Barinas Mitchell E, Aizenstein H, Koenen KC and Maki PM. Posttraumatic Stress Disorder Symptoms and Cardiovascular and Brain Health in Women. *JAMA Netw Open*. 2023;6:e2341388.
10. Kim K, Tsai AC, Sumner JA and Jung SJ. Posttraumatic stress disorder, cardiovascular disease outcomes and the modifying role of socioeconomic status. *J Affect Disord*. 2022;319:555-561.

11. Liberzon I, Abelson JL, Flagel SB, Raz J and Young EA. Neuroendocrine and psychophysiological responses in PTSD: a symptom provocation study. *Neuropsychopharmacology*. 1999;21:40-50.
12. Bedi US and Arora R. Cardiovascular manifestations of posttraumatic stress disorder. *J Natl Med Assoc*. 2007;99:642-9.
13. O'Donnell CJ, Schwartz Longacre L, Cohen BE, Fayad ZA, Gillespie CF, Liberzon I, Pathak GA, Polimanti R, Risbrough V, Ursano RJ, Vander Heide RS, Yancy CW, Vaccarino V, Sopko G and Stein MB. Posttraumatic Stress Disorder and Cardiovascular Disease: State of the Science, Knowledge Gaps, and Research Opportunities. *JAMA Cardiol*. 2021;6:1207-1216.
14. Edmondson D, Richardson S, Falzon L, Davidson KW, Mills MA and Neria Y. Posttraumatic stress disorder prevalence and risk of recurrence in acute coronary syndrome patients: a meta-analytic review. *PLoS One*. 2012;7:e38915.
15. Banerjee SB, Morrison FG and Ressler KJ. Genetic approaches for the study of PTSD: Advances and challenges. *Neurosci Lett*. 2017;649:139-146.
16. Olczak KJ, Taylor-Bateman V, Nicholls HL, Traylor M, Cabrera CP and Munroe PB. Hypertension genetics past, present and future applications. *J Intern Med*. 2021;290:1130-1152.
17. Evangelou E, Warren HR, Mosen-Ansorena D, Mifsud B, Pazoki R, Gao H, Ntritsos G, Dimou N, Cabrera CP, Karaman I, Ng FL, Evangelou M, Witkowska K, Tzani E, Hellwege JN, Giri A, Velez Edwards DR, Sun YV, Cho K, Gaziano JM, Wilson PWF, Tsao PS, Kovesdy CP, Esko T, Mägi R, Milani L, Almgren P, Boutin T, Debette S, Ding J, Giulianini F, Holliday EG, Jackson AU, Li-Gao R, Lin WY, Luan J, Mangino M, Oldmeadow C, Prins BP, Qian Y, Sargurupremraj M, Shah N, Surendran P, Thériault S, Verweij N, Willems SM, Zhao JH, Amouyel P, Connell J, de Mutsert R, Doney ASF, Farrall M, Menni C, Morris AD, Noordam R, Paré G, Poulter NR, Shields DC, Stanton A, Thom S, Abecasis G, Amin N, Arking DE, Ayers KL, Barbieri CM, Batini C, Bis JC, Blake T, Bochud M, Boehnke M, Boerwinkle E, Boomsma DI, Bottinger EP, Braund PS, Brumat M, Campbell A, Campbell H, Chakravarti A, Chambers JC, Chauhan G, Ciullo M, Cocca M, Collins F, Cordell HJ, Davies G, de Borst MH, de Geus EJ, Deary IJ, Deelen J, Del Greco MF, Demirkale CY, Dörr M, Ehret GB, Elosua R, Enroth S, Erzurumluoglu AM, Ferreira T, Frånberg M, Franco OH, Gandin I, Gasparini P, Giedraitis V, Gieger C, Grotto G, Goel A, Gow AJ, Gudnason V, Guo X, Gyllensten U, Hamsten A, Harris TB, Harris SE, Hartman CA, Havulinna AS, Hicks AA, Hofer E, Hofman A, Hottenga JJ, Huffman JE, Hwang SJ, Ingelsson E, James A, Jansen R, Jarvelin MR, Joehanes R, Johansson Å, Johnson AD, Joshi PK, Jousilahti P, Jukema JW, Jula A, Kähönen M, Kathiresan S, Keavney BD, Khaw KT, Knekt P, Knight J, Kolcic I, Kooner JS, Koskinen S, Kristiansson K, Kutalik Z, Laan M, Larson M, Launer LJ, Lehne B, Lehtimäki T, Liewald DCM, Lin L, Lind L, Lindgren CM, Liu Y, Loos RJF, Lopez LM, Lu Y, Lyytikäinen LP, Mahajan A, Mamasoula C, Marrugat J, Marten J, Milaneschi Y, Morgan A, Morris AP, Morrison AC, Munson PJ, Nalls MA, Nandakumar P, Nelson CP, Niiranen T, Nolte IM, Nutile T, Oldehinkel AJ, Oostra BA, O'Reilly PF, Org E, Padmanabhan S, Palmas W, Palotie A, Pattie A, Penninx B, Perola M, Peters A, Polasek O, Pramstaller PP, Nguyen QT, Raitakari OT, Ren M, Rettig R, Rice K, Ridker PM, Ried JS, Riese H, Ripatti S, Robino A, Rose LM, Rotter JI, Rudan I, Ruggiero D, Saba Y, Sala CF, Salomaa V, Samani NJ, Sarin AP, Schmidt R, Schmidt H, Shrine N,

Shared genetics of PTSD and cardiovascular disease

Siscovick D, Smith AV, Snieder H, Söber S, Sorice R, Starr JM, Stott DJ, Strachan DP, Strawbridge RJ, Sundström J, Swertz MA, Taylor KD, Teumer A, Tobin MD, Tomaszewski M, Toniolo D, Traglia M, Trompet S, Tuomilehto J, Tzourio C, Uitterlinden AG, Vaez A, van der Most PJ, van Duijn CM, Vergnaud AC, Verwoert GC, Vitart V, Völker U, Vollenweider P, Vuckovic D, Watkins H, Wild SH, Willemsen G, Wilson JF, Wright AF, Yao J, Zemunik T, Zhang W, Attia JR, Butterworth AS, Chasman DI, Conen D, Cucca F, Danesh J, Hayward C, Howson JMM, Laakso M, Lakatta EG, Langenberg C, Melander O, Mook-Kanamori DO, Palmer CNA, Risch L, Scott RA, Scott RJ, Sever P, Spector TD, van der Harst P, Wareham NJ, Zeggini E, Levy D, Munroe PB, Newton-Cheh C, Brown MJ, Metspalu A, Hung AM, O'Donnell CJ, Edwards TL, Psaty BM, Tzoulaki I, Barnes MR, Wain LV, Elliott P and Caulfield MJ. Genetic analysis of over 1 million people identifies 535 new loci associated with blood pressure traits. *Nat Genet.* 2018;50:1412-1425.

18. de Oliveira CM, Pereira AC, de Andrade M, Soler JM and Krieger JE. Heritability of cardiovascular risk factors in a Brazilian population: Baependi Heart Study. *BMC Medical Genetics.* 2008;9:32.

19. Levy D, DeStefano AL, Larson MG, O'Donnell CJ, Lifton RP, Gavras H, Cupples LA and Myers RH. Evidence for a gene influencing blood pressure on chromosome 17. Genome scan linkage results for longitudinal blood pressure phenotypes in subjects from the framingham heart study. *Hypertension.* 2000;36:477-83.

20. Lindgren MP, PirouziFard M, Smith JG, Sundquist J, Sundquist K and Zöller B. A Swedish Nationwide Adoption Study of the Heritability of Heart Failure. *JAMA Cardiol.* 2018;3:703-710.

21. Pathak GA, Singh K, Choi KW, Fang Y, Kouakou MR, Lee YH, Zhou X, Fritsche LG, Wendt FR, Davis LK and Polimanti R. Genetic Liability to Posttraumatic Stress Disorder Symptoms and Its Association With Cardiometabolic and Respiratory Outcomes. *JAMA Psychiatry.* 2024;81:34-44.

22. Soremekun O, Musanabaganwa C, Uwineza A, Ardissino M, Rajasundaram S, Wani AH, Jansen S, Mutabaruka J, Rutembesa E, Soremekun C, Cheickna C, Wele M, Mugisha J, Nash O, Kinyanda E, Nitsch D, Fornage M, Chikowore T, Gill D, Wildman DE, Mutesa L, Uddin M and Fatumo S. A Mendelian randomization study of genetic liability to post-traumatic stress disorder and risk of ischemic stroke. *Translational Psychiatry.* 2023;13:237.

23. Seligowski AV, Misganaw B, Duffy LA, Ressler KJ and Guffanti G. Leveraging Large-Scale Genetics of PTSD and Cardiovascular Disease to Demonstrate Robust Shared Risk and Improve Risk Prediction Accuracy. *Am J Psychiatry.* 2022;179:814-823.

24. NIH: National Heart L, and Blood Institute. NHLBI Working Group: The Cardiovascular Consequences of Post-Traumatic Stress Disorder. 2018.

25. Nievergelt CM, Maihofer AX, Atkinson EG, Chen C-Y, Choi KW, Coleman JRI, Daskalakis NP, Duncan LE, Polimanti R, Aaronson C, Amstadter AB, Andersen SB, Andreassen OA, Arbisi PA, Ashley-Koch AE, Austin SB, Avdibegović E, Babić D, Bacanu S-A, Baker DG, Batzler A, Beckham JC, Belangero S, Benjet C, Bergner C, Bierer LM, Biernacka JM, Bierut LJ, Bisson JI, Boks MP, Bolger EA, Brandolino A, Breen G, Bressan RA, Bryant RA, Bustamante AC, Bybjerg-Grauholm J, Bækvad-Hansen M, Børghlum AD, Børte S, Cahn L, Calabrese JR, Caldas-de-Almeida JM, Chatzinakos C, Cheema S, Clouston SAP, Colodro-

Conde L, Coombes BJ, Cruz-Fuentes CS, Dale AM, Dalvie S, Davis LK, Deckert J, Delahanty DL, Dennis MF, Desarnaud F, DiPietro CP, Disner SG, Docherty AR, Domschke K, Dyb G, Kulenović AD, Edenberg HJ, Evans A, Fabbri C, Fani N, Farrer LA, Feder A, Feeny NC, Flory JD, Forbes D, Franz CE, Galea S, Garrett ME, Gelaye B, Gelernter J, Geuze E, Gillespie CF, Goleva SB, Gordon SD, Goçi A, Grasser LR, Guindalini C, Haas M, Hagenaars S, Hauser MA, Heath AC, Hemmings SMJ, Hesselbrock V, Hickie IB, Hogan K, Hougaard DM, Huang H, Huckins LM, Hveem K, Jakovljević M, Javanbakht A, Jenkins GD, Johnson J, Jones I, Jovanovic T, Karstoft K-I, Kaufman ML, Kennedy JL, Kessler RC, Khan A, Kimbrel NA, King AP, Koen N, Kotov R, Kranzler HR, Krebs K, Kremen WS, Kuan P-F, Lawford BR, Lebois LAM, Lehto K, Levey DF, Lewis C, Liberzon I, Linnstaedt SD, Logue MW, Lori A, Lu Y, Luft BJ, Lupton MK, Luykx JJ, Makotkine I, Maples-Keller JL, Marchese S, Marmar C, Martin NG, Martínez-Levy GA, McAloney K, McFarlane A, McLaughlin KA, McLean SA, Medland SE, Mehta D, Meyers J, Michopoulos V, Mikita EA, Milani L, Milberg W, Miller MW, Morey RA, Morris CP, Mors O, Mortensen PB, Mufford MS, Nelson EC, Nordentoft M, Norman SB, Nugent NR, O'Donnell M, Orcutt HK, Pan PM, Panizzon MS, Pathak GA, Peters ES, Peterson AL, Peverill M, Pietrzak RH, Polusny MA, Porjesz B, Powers A, Qin X-J, Ratanatharathorn A, Risbrough VB, Roberts AL, Rothbaum AO, Rothbaum BO, Roy-Byrne P, Ruggiero KJ, Rung A, Runz H, Rutten BPF, de Viteri SS, Salum GA, Sampson L, Sanchez SE, Santoro M, Seah C, Seedat S, Seng JS, Shabalin A, Sheerin CM, Silove D, Smith AK, Smoller JW, Sponheim SR, Stein DJ, Stensland S, Stevens JS, Sumner JA, Teicher MH, Thompson WK, Tiwari AK, Trapido E, Uddin M, Ursano RJ, Valdimarsdóttir U, Van Hooff M, Vermetten E, Vinkers CH, Voisey J, Wang Y, Wang Z, Waszczuk M, Weber H, Wendt FR, Werge T, Williams MA, Williamson DE, Winsvold BS, Winternitz S, Wolf C, Wolf EJ, Xia Y, Xiong Y, Yehuda R, Young KA, Young RM, Zai CC, Zai GC, Zervas M, Zhao H, Zoellner LA, Zwart J-A, deRoon-Cassini T, van Rooij SJH, van den Heuvel LL, Stein MB, Ressler KJ, Koenen KC, Study A, Estonian Biobank Research T, FinnGen I and Psychiatry HA-I. Genome-wide association analyses identify 95 risk loci and provide insights into the neurobiology of post-traumatic stress disorder. *Nature Genetics*. 2024.

26. Bai W, Suzuki H, Huang J, Francis C, Wang S, Tarroni G, Guitton F, Aung N, Fung K, Petersen SE, Piechnik SK, Neubauer S, Evangelou E, Dehghan A, O'Regan DP, Wilkins MR, Guo Y, Matthews PM and Rueckert D. A population-based phenome-wide association study of cardiac and aortic structure and function. *Nat Med*. 2020;26:1654-1662.

27. Zhou W, Brumpton B, Kabil O, Gudmundsson J, Thorleifsson G, Weinstock J, Zawistowski M, Nielsen JB, Chaker L, Medici M, Teumer A, Naitza S, Sanna S, Schultheiss UT, Cappola A, Karjalainen J, Kurki M, Oneka M, Taylor P, Fritsche LG, Graham SE, Wolford BN, Overton W, Rasheed H, Haug EB, Gabrielsen ME, Skogholt AH, Surakka I, Davey Smith G, Pandit A, Roychowdhury T, Hornsby WE, Jonasson JG, Senter L, Liyanarachchi S, Ringel MD, Xu L, Kiemeny LA, He H, Netea-Maier RT, Mayordomo JI, Plantinga TS, Hrafinkelsson J, Hjartarson H, Sturgis EM, Palotie A, Daly M, Citterio CE, Arvan P, Brummett CM, Boehnke M, de la Chapelle A, Stefansson K, Hveem K, Willer CJ and Åsvold BO. GWAS of thyroid stimulating hormone highlights pleiotropic effects and inverse association with thyroid cancer. *Nat Commun*. 2020;11:3981.

28. Wu K-HH, Douville NJ, Konerman MC, Mathis MR, Hummel SL, Wolford BN, Surakka I, Graham SE, Joo H, Hirbo J, Cox NJ, Lee S, Preuss M, Loos RJF, Daly MJ, Neale BM, Zhou

W, Hornsby WE, Willer CJ and Initiative obotGBM-a. Polygenic risk score from a multi-ancestry GWAS uncovers susceptibility of heart failure. *medRxiv*.

2021:2021.12.06.21267389.

29. Hartiala JA, Han Y, Jia Q, Hilser JR, Huang P, Gukasyan J, Schwartzman WS, Cai Z, Biswas S, Trégouët DA, Smith NL, Seldin M, Pan C, Mehrabian M, Lusic AJ, Bazeley P, Sun YV, Liu C, Quyyumi AA, Scholz M, Thiery J, Delgado GE, Kleber ME, März W, Howe LJ, Asselbergs FW, van Vugt M, Vlachojannis GJ, Patel RS, Lytikäinen LP, Kähönen M, Lehtimäki T, Nieminen TVM, Kuukasjärvi P, Laurikka JO, Chang X, Heng CK, Jiang R, Kraus WE, Hauser ER, Ferguson JF, Reilly MP, Ito K, Koyama S, Kamatani Y, Komuro I, Stolze LK, Romanoski CE, Khan MD, Turner AW, Miller CL, Aherrahrou R, Civelek M, Ma L, Björkegren JLM, Kumar SR, Tang WHW, Hazen SL and Allayee H. Genome-wide analysis identifies novel susceptibility loci for myocardial infarction. *Eur Heart J*. 2021;42:919-933.

30. Tcheandjieu C, Zhu X, Hilliard AT, Clarke SL, Napolioni V, Ma S, Lee KM, Fang H, Chen F, Lu Y, Tsao NL, Raghavan S, Koyama S, Gorman BR, Vujkovic M, Klarin D, Levin MG, Sinnott-Armstrong N, Wojcik GL, Plomondon ME, Maddox TM, Waldo SW, Bick AG, Pyarajan S, Huang J, Song R, Ho YL, Buyske S, Kooperberg C, Haessler J, Loos RJF, Do R, Verbanck M, Chaudhary K, North KE, Avery CL, Graff M, Haiman CA, Le Marchand L, Wilkens LR, Bis JC, Leonard H, Shen B, Lange LA, Giri A, Dikilitas O, Kullo IJ, Stanaway IB, Jarvik GP, Gordon AS, Hebring S, Namjou B, Kaufman KM, Ito K, Ishigaki K, Kamatani Y, Verma SS, Ritchie MD, Kember RL, Baras A, Lotta LA, Kathiresan S, Hauser ER, Miller DR, Lee JS, Saleheen D, Reaven PD, Cho K, Gaziano JM, Natarajan P, Huffman JE, Voight BF, Rader DJ, Chang KM, Lynch JA, Damrauer SM, Wilson PWF, Tang H, Sun YV, Tsao PS, O'Donnell CJ and Assimes TL. Large-scale genome-wide association study of coronary artery disease in genetically diverse populations. *Nat Med*. 2022;28:1679-1692.

31. Mahajan A, Spracklen CN, Zhang W, Ng MCY, Petty LE, Kitajima H, Yu GZ, Rüeger S, Speidel L, Kim YJ, Horikoshi M, Mercader JM, Taliun D, Moon S, Kwak SH, Robertson NR, Rayner NW, Loh M, Kim BJ, Chiou J, Miguel-Escalada I, Della Briotta Parolo P, Lin K, Bragg F, Preuss MH, Takeuchi F, Nano J, Guo X, Lamri A, Nakatochi M, Scott RA, Lee JJ, Huerta-Chagoya A, Graff M, Chai JF, Parra EJ, Yao J, Bielak LF, Tabara Y, Hai Y, Steinthorsdottir V, Cook JP, Kals M, Grarup N, Schmidt EM, Pan I, Sofer T, Wuttke M, Sarnowski C, Gieger C, Nounsou D, Trompet S, Long J, Sun M, Tong L, Chen WM, Ahmad M, Noordam R, Lim VJY, Tam CHT, Joo YY, Chen CH, Raffield LM, Lecoeur C, Prins BP, Nicolas A, Yanek LR, Chen G, Jensen RA, Tajuddin S, Kabagambe EK, An P, Xiang AH, Choi HS, Cade BE, Tan J, Flanagan J, Abaitua F, Adair LS, Adeyemo A, Aguilar-Salinas CA, Akiyama M, Anand SS, Bertoni A, Bian Z, Bork-Jensen J, Brandslund I, Brody JA, Brummett CM, Buchanan TA, Canouil M, Chan JCN, Chang LC, Chee ML, Chen J, Chen SH, Chen YT, Chen Z, Chuang LM, Cushman M, Das SK, de Silva HJ, Dedoussis G, Dimitrov L, Doumatey AP, Du S, Duan Q, Eckardt KU, Emery LS, Evans DS, Evans MK, Fischer K, Floyd JS, Ford I, Fornage M, Franco OH, Frayling TM, Freedman BI, Fuchsberger C, Genter P, Gerstein HC, Giedraitis V, González-Villalpando C, González-Villalpando ME, Goodarzi MO, Gordon-Larsen P, Gorkin D, Gross M, Guo Y, Hackinger S, Han S, Hattersley AT, Herder C, Howard AG, Hsueh W, Huang M, Huang W, Hung YJ, Hwang MY, Hwu CM, Ichihara S, Ikram MA, Ingelsson M, Islam MT, Isono M, Jang HM, Jasmine F, Jiang G, Jonas JB, Jørgensen ME, Jørgensen T, Kamatani Y, Kandeel FR, Kasturiratne A, Katsuya T, Kaur V, Kawaguchi T, Keaton JM, Kho AN, Khor CC,



Shared genetics of PTSD and cardiovascular disease

Kibriya MG, Kim DH, Kohara K, Kriebel J, Kronenberg F, Kuusisto J, Läll K, Lange LA, Lee MS, Lee NR, Leong A, Li L, Li Y, Li-Gao R, Ligthart S, Lindgren CM, Linneberg A, Liu CT, Liu J, Locke AE, Louie T, Luan J, Luk AO, Luo X, Lv J, Lyssenko V, Mamakou V, Mani KR, Meitinger T, Metspalu A, Morris AD, Nadkarni GN, Nadler JL, Nalls MA, Nayak U, Nongmaithem SS, Ntalla I, Okada Y, Orozco L, Patel SR, Pereira MA, Peters A, Pirie FJ, Porneala B, Prasad G, Preissl S, Rasmussen-Torvik LJ, Reiner AP, Roden M, Rohde R, Roll K, Sabanayagam C, Sander M, Sandow K, Sattar N, Schönherr S, Schurmann C, Shahriar M, Shi J, Shin DM, Shriner D, Smith JA, So WY, Stančáková A, Stilp AM, Strauch K, Suzuki K, Takahashi A, Taylor KD, Thorand B, Thorleifsson G, Thorsteinsdottir U, Tomlinson B, Torres JM, Tsai FJ, Tuomilehto J, Tusie-Luna T, Udler MS, Valladares-Salgado A, van Dam RM, van Klinken JB, Varma R, Vujkovic M, Wachter-Rodarte N, Wheeler E, Whitsel EA, Wickremasinghe AR, van Dijk KW, Witte DR, Yajnik CS, Yamamoto K, Yamauchi T, Yengo L, Yoon K, Yu C, Yuan JM, Yusuf S, Zhang L, Zheng W, Raffel LJ, Igase M, Ipp E, Redline S, Cho YS, Lind L, Province MA, Hanis CL, Peyser PA, Ingelsson E, Zonderman AB, Psaty BM, Wang YX, Rotimi CN, Becker DM, Matsuda F, Liu Y, Zeggini E, Yokota M, Rich SS, Kooperberg C, Pankow JS, Engert JC, Chen YI, Froguel P, Wilson JG, Sheu WHH, Kardina SLR, Wu JY, Hayes MG, Ma RCW, Wong TY, Groop L, Mook-Kanamori DO, Chandak GR, Collins FS, Bharadwaj D, Paré G, Sale MM, Ahsan H, Motala AA, Shu XO, Park KS, Jukema JW, Cruz M, McKean-Cowdin R, Grallert H, Cheng CY, Bottinger EP, Dehghan A, Tai ES, Dupuis J, Kato N, Laakso M, Köttgen A, Koh WP, Palmer CNA, Liu S, Abecasis G, Kooner JS, Loos RJF, North KE, Haiman CA, Florez JC, Saleheen D, Hansen T, Pedersen O, Mägi R, Langenberg C, Wareham NJ, Maeda S, Kadowaki T, Lee J, Millwood IY, Walters RG, Stefansson K, Myers SR, Ferrer J, Gaulton KJ, Meigs JB, Mohlke KL, Gloyn AL, Bowden DW, Below JE, Chambers JC, Sim X, Boehnke M, Rotter JI, McCarthy MI and Morris AP. Multi-ancestry genetic study of type 2 diabetes highlights the power of diverse populations for discovery and translation. *Nat Genet.* 2022;54:560-572.

32. Roselli C, Chaffin MD, Weng LC, Aeschbacher S, Ahlberg G, Albert CM, Almgren P, Alonso A, Anderson CD, Aragam KG, Arking DE, Barnard J, Bartz TM, Benjamin EJ, Bihlmeyer NA, Bis JC, Bloom HL, Boerwinkle E, Bottinger EB, Brody JA, Calkins H, Campbell A, Cappola TP, Carlquist J, Chasman DI, Chen LY, Chen YI, Choi EK, Choi SH, Christophersen IE, Chung MK, Cole JW, Conen D, Cook J, Crijns HJ, Cutler MJ, Damrauer SM, Daniels BR, Darbar D, Delgado G, Denny JC, Dichgans M, Dörr M, Dudink EA, Dudley SC, Esa N, Esko T, Eskola M, Fatkin D, Felix SB, Ford I, Franco OH, Geelhoed B, Grewal RP, Gudnason V, Guo X, Gupta N, Gustafsson S, Gutmann R, Hamsten A, Harris TB, Hayward C, Heckbert SR, Hernesniemi J, Hocking LJ, Hofman A, Horimoto A, Huang J, Huang PL, Huffman J, Ingelsson E, Ipek EG, Ito K, Jimenez-Conde J, Johnson R, Jukema JW, Kääb S, Kähönen M, Kamatani Y, Kane JP, Kastrati A, Kathiresan S, Katschnig-Winter P, Kavousi M, Kessler T, Kietselaer BL, Kirchhof P, Kleber ME, Knight S, Krieger JE, Kubo M, Launer LJ, Laurikka J, Lehtimäki T, Leineweber K, Lemaitre RN, Li M, Lim HE, Lin HJ, Lin H, Lind L, Lindgren CM, Lokki ML, London B, Loos RJF, Low SK, Lu Y, Lyytikäinen LP, Macfarlane PW, Magnusson PK, Mahajan A, Malik R, Mansur AJ, Marcus GM, Margolin L, Margulies KB, März W, McManus DD, Melander O, Mohanty S, Montgomery JA, Morley MP, Morris AP, Müller-Nurasyid M, Natale A, Nazarian S, Neumann B, Newton-Cheh C, Niemeijer MN, Nikus K, Nilsson P, Noordam R, Oellers H, Olesen MS, Orho-Melander M, Padmanabhan S, Pak HN,

Paré G, Pedersen NL, Pera J, Pereira A, Porteous D, Psaty BM, Pulit SL, Pullinger CR, Rader DJ, Refsgaard L, Ribasés M, Ridker PM, Rienstra M, Risch L, Roden DM, Rosand J, Rosenberg MA, Rost N, Rotter JI, Saba S, Sandhu RK, Schnabel RB, Schramm K, Schunkert H, Schurman C, Scott SA, Seppälä I, Shaffer C, Shah S, Shalaby AA, Shim J, Shoemaker MB, Siland JE, Sinisalo J, Sinner MF, Slowik A, Smith AV, Smith BH, Smith JG, Smith JD, Smith NL, Soliman EZ, Sotoodehnia N, Stricker BH, Sun A, Sun H, Svendsen JH, Tanaka T, Tanriverdi K, Taylor KD, Teder-Laving M, Teumer A, Thériault S, Trompet S, Tucker NR, Tveit A, Uitterlinden AG, Van Der Harst P, Van Gelder IC, Van Wagener DR, Verweij N, Vlachopoulou E, Völker U, Wang B, Weeke PE, Weijs B, Weiss R, Weiss S, Wells QS, Wiggins KL, Wong JA, Woo D, Worrall BB, Yang PS, Yao J, Yoneda ZT, Zeller T, Zeng L, Lubitz SA, Lunetta KL and Ellinor PT. Multi-ethnic genome-wide association study for atrial fibrillation. *Nat Genet.* 2018;50:1225-1233.

33. Pulit SL, Stoneman C, Morris AP, Wood AR, Glastonbury CA, Tyrrell J, Yengo L, Ferreira T, Marouli E, Ji Y, Yang J, Jones S, Beaumont R, Croteau-Chonka DC, Winkler TW, Hattersley AT, Loos RJJ, Hirschhorn JN, Visscher PM, Frayling TM, Yaghootkar H and Lindgren CM. Meta-analysis of genome-wide association studies for body fat distribution in 694 649 individuals of European ancestry. *Hum Mol Genet.* 2019;28:166-174.

34. Graham SE, Clarke SL, Wu KH, Kanoni S, Zajac GJM, Ramdas S, Surakka I, Ntalla I, Vedantam S, Winkler TW, Locke AE, Marouli E, Hwang MY, Han S, Narita A, Choudhury A, Bentley AR, Ekoru K, Verma A, Trivedi B, Martin HC, Hunt KA, Hui Q, Klarin D, Zhu X, Thorleifsson G, Helgadottir A, Gudbjartsson DF, Holm H, Olafsson I, Akiyama M, Sakaue S, Terao C, Kanai M, Zhou W, Brumpton BM, Rasheed H, Ruotsalainen SE, Havulinna AS, Veturi Y, Feng Q, Rosenthal EA, Lingren T, Pacheco JA, Pendergrass SA, Haessler J, Giulianini F, Bradford Y, Miller JE, Campbell A, Lin K, Millwood IY, Hindy G, Rasheed A, Faul JD, Zhao W, Weir DR, Turman C, Huang H, Graff M, Mahajan A, Brown MR, Zhang W, Yu K, Schmidt EM, Pandit A, Gustafsson S, Yin X, Luan J, Zhao JH, Matsuda F, Jang HM, Yoon K, Medina-Gomez C, Pitsillides A, Hottenga JJ, Willemsen G, Wood AR, Ji Y, Gao Z, Haworth S, Mitchell RE, Chai JF, Aadahl M, Yao J, Manichaikul A, Warren HR, Ramirez J, Bork-Jensen J, Kårhus LL, Goel A, Sabater-Lleal M, Noordam R, Sidore C, Fiorillo E, McDaid AF, Marques-Vidal P, Wielscher M, Trompet S, Sattar N, Møllehave LT, Thuesen BH, Munz M, Zeng L, Huang J, Yang B, Poveda A, Kurbasic A, Lamina C, Forer L, Scholz M, Galesloot TE, Bradfield JP, Daw EW, Zmuda JM, Mitchell JS, Fuchsberger C, Christensen H, Brody JA, Feitosa MF, Wojczynski MK, Preuss M, Mangino M, Christofidou P, Verweij N, Benjamins JW, Engmann J, Kember RL, Sliker RC, Lo KS, Zilhao NR, Le P, Kleber ME, Delgado GE, Huo S, Ikeda DD, Iha H, Yang J, Liu J, Leonard HL, Marten J, Schmidt B, Arendt M, Smyth LJ, Cañadas-Garre M, Wang C, Nakatochi M, Wong A, Hutri-Kähönen N, Sim X, Xia R, Huerta-Chagoya A, Fernandez-Lopez JC, Lyssenko V, Ahmed M, Jackson AU, Yousri NA, Irvin MR, Oldmeadow C, Kim HN, Ryu S, Timmers P, Arbeeve L, Dorajoo R, Lange LA, Chai X, Prasad G, Lorés-Motta L, Pauper M, Long J, Li X, Theusch E, Takeuchi F, Spracklen CN, Loukola A, Bollepalli S, Warner SC, Wang YX, Wei WB, Nutile T, Ruggiero D, Sung YJ, Hung YJ, Chen S, Liu F, Yang J, Kentistou KA, Gorski M, Brumat M, Meidtner K, Bielak LF, Smith JA, Hebbard P, Farmaki AE, Hofer E, Lin M, Xue C, Zhang J, Concas MP, Vaccargiu S, van der Most PJ, Pitkänen N, Cade BE, Lee J, van der Laan SW, Chitrala KN, Weiss S, Zimmermann ME, Lee JY, Choi HS, Nethander M, Freitag-Wolf S, Southam L, Rayner NW, Wang CA, Lin SY, Wang

Shared genetics of PTSD and cardiovascular disease

JS, Couture C, Lyytikäinen LP, Nikus K, Cuellar-Partida G, Vestergaard H, Hildalgo B, Giannakopoulou O, Cai Q, Obura MO, van Setten J, Li X, Schwander K, Terzikhan N, Shin JH, Jackson RD, Reiner AP, Martin LW, Chen Z, Li L, Highland HM, Young KL, Kawaguchi T, Thiery J, Bis JC, Nadkarni GN, Launer LJ, Li H, Nalls MA, Raitakari OT, Ichihara S, Wild SH, Nelson CP, Campbell H, Jäger S, Nabika T, Al-Mulla F, Niinikoski H, Braund PS, Kolcic I, Kovacs P, Giardoglou T, Katsuya T, Bhatti KF, de Kleijn D, de Borst GJ, Kim EK, Adams HHH, Ikram MA, Zhu X, Asselbergs FW, Kraaijeveld AO, Beulens JWJ, Shu XO, Rallidis LS, Pedersen O, Hansen T, Mitchell P, Hewitt AW, Kähönen M, Pérusse L, Bouchard C, Tönjes A, Chen YI, Pennell CE, Mori TA, Lieb W, Franke A, Ohlsson C, Mellström D, Cho YS, Lee H, Yuan JM, Koh WP, Rhee SY, Woo JT, Heid IM, Stark KJ, Völzke H, Homuth G, Evans MK, Zonderman AB, Polasek O, Pasterkamp G, Hofer IE, Redline S, Pahkala K, Oldehinkel AJ, Snieder H, Biino G, Schmidt R, Schmidt H, Chen YE, Bandinelli S, Dedoussis G, Thanaraj TA, Kardina SLR, Kato N, Schulze MB, Girotto G, Jung B, Böger CA, Joshi PK, Bennett DA, De Jager PL, Lu X, Mamakou V, Brown M, Caulfield MJ, Munroe PB, Guo X, Ciullo M, Jonas JB, Samani NJ, Kaprio J, Pajukanta P, Adair LS, Bechayda SA, de Silva HJ, Wickremasinghe AR, Krauss RM, Wu JY, Zheng W, den Hollander AI, Bharadwaj D, Correa A, Wilson JG, Lind L, Heng CK, Nelson AE, Golightly YM, Wilson JF, Penninx B, Kim HL, Attia J, Scott RJ, Rao DC, Arnett DK, Hunt SC, Walker M, Koistinen HA, Chandak GR, Yajnik CS, Mercader JM, Tusié-Luna T, Aguilar-Salinas CA, Villalpando CG, Orozco L, Fornage M, Tai ES, van Dam RM, Lehtimäki T, Chaturvedi N, Yokota M, Liu J, Reilly DF, McKnight AJ, Kee F, Jöckel KH, McCarthy MI, Palmer CNA, Vitart V, Hayward C, Simonsick E, van Duijn CM, Lu F, Qu J, Hishigaki H, Lin X, März W, Parra EJ, Cruz M, Gudnason V, Tardif JC, Lettre G, Hart LM, Elders PJM, Damrauer SM, Kumari M, Kivimäki M, van der Harst P, Spector TD, Loos RJF, Province MA, Psaty BM, Brandslund I, Pramstaller PP, Christensen K, Ripatti S, Widén E, Hakonarson H, Grant SFA, Kiemeneck L, de Graaf J, Loeffler M, Kronenberg F, Gu D, Erdmann J, Schunkert H, Franks PW, Linneberg A, Jukema JW, Khera AV, Männikkö M, Jarvelin MR, Kutalik Z, Cucca F, Mook-Kanamori DO, van Dijk KW, Watkins H, Strachan DP, Grarup N, Sever P, Poulter N, Rotter JI, Dantoft TM, Karpe F, Neville MJ, Timpson NJ, Cheng CY, Wong TY, Khor CC, Sabanayagam C, Peters A, Gieger C, Hattersley AT, Pedersen NL, Magnusson PKE, Boomsma DI, de Geus EJC, Cupples LA, van Meurs JBJ, Ghanbari M, Gordon-Larsen P, Huang W, Kim YJ, Tabara Y, Wareham NJ, Langenberg C, Zeggini E, Kuusisto J, Laakso M, Ingelsson E, Abecasis G, Chambers JC, Kooner JS, de Vries PS, Morrison AC, North KE, Daviglus M, Kraft P, Martin NG, Whitfield JB, Abbas S, Saleheen D, Walters RG, Holmes MV, Black C, Smith BH, Justice AE, Baras A, Buring JE, Ridker PM, Chasman DI, Kooperberg C, Wei WQ, Jarvik GP, Namjou B, Hayes MG, Ritchie MD, Jousilahti P, Salomaa V, Hveem K, Åsvold BO, Kubo M, Kamatani Y, Okada Y, Murakami Y, Thorsteinsdottir U, Stefansson K, Ho YL, Lynch JA, Rader DJ, Tsao PS, Chang KM, Cho K, O'Donnell CJ, Gaziano JM, Wilson P, Rotimi CN, Hazelhurst S, Ramsay M, Trembath RC, van Heel DA, Tamiya G, Yamamoto M, Kim BJ, Mohlke KL, Frayling TM, Hirschhorn JN, Kathiresan S, Boehnke M, Natarajan P, Peloso GM, Brown CD, Morris AP, Assimes TL, Deloukas P, Sun YV and Willer CJ. The power of genetic diversity in genome-wide association studies of lipids. *Nature*. 2021;600:675-679.

35. Xu K, Li B, McGinnis KA, Vickers-Smith R, Dao C, Sun N, Kember RL, Zhou H, Becker WC, Gelernter J, Kranzler HR, Zhao H and Justice AC. Genome-wide association study of

smoking trajectory and meta-analysis of smoking status in 842,000 individuals. *Nat Commun.* 2020;11:5302.

36. Wang Z, Emmerich A, Pilon NJ, Moore T, Hemerich D, Cornelis MC, Mazzaferro E, Broos S, Ahluwalia TS, Bartz TM, Bentley AR, Bielak LF, Chong M, Chu AY, Berry D, Dorajoo R, Dueker ND, Kasbohm E, Feenstra B, Feitosa MF, Gieger C, Graff M, Hall LM, Haller T, Hartwig FP, Hillis DA, Huikari V, Heard-Costa N, Holzapfel C, Jackson AU, Johansson Å, Jørgensen AM, Kaakinen MA, Karlsson R, Kerr KF, Kim B, Koolhaas CM, Kutalik Z, Lagou V, Lind PA, Lorentzon M, Lytikäinen LP, Mangino M, Metzendorf C, Monroe KR, Pacolet A, Pérusse L, Pool R, Richmond RC, Rivera NV, Robiou-du-Pont S, Schraut KE, Schulz CA, Stringham HM, Tanaka T, Teumer A, Turman C, van der Most PJ, Vanmunster M, van Rooij FJA, van Vliet-Ostaptchouk JV, Zhang X, Zhao JH, Zhao W, Balkhiyarova Z, Balslev-Harder MN, Baumeister SE, Beilby J, Blangero J, Boomsma DI, Brage S, Braund PS, Brody JA, Bruinenberg M, Ekelund U, Liu CT, Cole JW, Collins FS, Cupples LA, Esko T, Enroth S, Faul JD, Fernandez-Rhodes L, Fohner AE, Franco OH, Galesloot TE, Gordon SD, Grarup N, Hartman CA, Heiss G, Hui J, Illig T, Jago R, James A, Joshi PK, Jung T, Kähönen M, Kilpeläinen TO, Koh WP, Kolcic I, Kraft PP, Kuusisto J, Launer LJ, Li A, Linneberg A, Luan J, Vidal PM, Medland SE, Milaneschi Y, Moscati A, Musk B, Nelson CP, Nolte IM, Pedersen NL, Peters A, Peyser PA, Power C, Raitakari OT, Reedik M, Reiner AP, Ridker PM, Rudan I, Ryan K, Sarzynski MA, Scott LJ, Scott RA, Sidney S, Siggeirsdottir K, Smith AV, Smith JA, Sonestedt E, Strøm M, Tai ES, Teo KK, Thorand B, Tönjes A, Tremblay A, Uitterlinden AG, Vangipurapu J, van Schoor N, Völker U, Willemssen G, Williams K, Wong Q, Xu H, Young KL, Yuan JM, Zillikens MC, Zonderman AB, Ameer A, Bandinelli S, Bis JC, Boehnke M, Bouchard C, Chasman DI, Smith GD, de Geus EJC, Deldicque L, Dörr M, Evans MK, Ferrucci L, Fornage M, Fox C, Garland T, Jr., Gudnason V, Gyllensten U, Hansen T, Hayward C, Horta BL, Hyppönen E, Jarvelin MR, Johnson WC, Kardia SLR, Kiemenev LA, Laakso M, Langenberg C, Lehtimäki T, Marchand LL, Magnusson PKE, Martin NG, Melbye M, Metspalu A, Meyre D, North KE, Ohlsson C, Oldehinkel AJ, Orho-Melander M, Pare G, Park T, Pedersen O, Penninx B, Pers TH, Polasek O, Prokopenko I, Rotimi CN, Samani NJ, Sim X, Snieder H, Sørensen TIA, Spector TD, Timpson NJ, van Dam RM, van der Velde N, van Duijn CM, Vollenweider P, Völzke H, Voortman T, Waeber G, Wareham NJ, Weir DR, Wichmann HE, Wilson JF, Hevener AL, Krook A, Zierath JR, Thomis MAI, Loos RJF and Hoed MD. Genome-wide association analyses of physical activity and sedentary behavior provide insights into underlying mechanisms and roles in disease prevention. *Nat Genet.* 2022;54:1332-1344.

37. Merino J, Dashti HS, Sarnowski C, Lane JM, Todorov PV, Udler MS, Song Y, Wang H, Kim J, Tucker C, Campbell J, Tanaka T, Chu AY, Tsai L, Pers TH, Chasman DI, Rutter MK, Dupuis J, Florez JC and Saxena R. Genetic analysis of dietary intake identifies new loci and functional links with metabolic traits. *Nat Hum Behav.* 2022;6:155-163.

38. Watanabe K, Jansen PR, Savage JE, Nandakumar P, Wang X, Hinds DA, Gelernter J, Levey DF, Polimanti R, Stein MB, Van Someren EJW, Smit AB and Posthuma D. Genome-wide meta-analysis of insomnia prioritizes genes associated with metabolic and psychiatric pathways. *Nat Genet.* 2022;54:1125-1132.

39. Nievergelt CM, Maihofer AX, Atkinson EG, Chen CY, Choi KW, Coleman JR, Daskalakis NP, Duncan LE, Polimanti R, Aaronson C, Amstadter AB, Andersen SB,

Shared genetics of PTSD and cardiovascular disease

Andreassen OA, Arbisi PA, Ashley-Koch AE, Austin SB, Avdibegović E, Babic D, Bacanu SA, Baker DG, Batzler A, Beckham JC, Belangero S, Benjet C, Bergner C, Bierer LM, Biernacka JM, Bierut LJ, Bisson JI, Boks MP, Bolger EA, Brandolino A, Breen G, Bressan RA, Bryant RA, Bustamante AC, Bybjerg-Grauholm J, Bækvad-Hansen M, Børghlum AD, Børte S, Cahn L, Calabrese JR, Caldas-de-Almeida JM, Chatzinakos C, Cheema S, Clouston SAP, Colodro-Conde L, Coombes BJ, Cruz-Fuentes CS, Dale AM, Dalvie S, Davis LK, Deckert J, Delahanty DL, Dennis MF, deRoon-Cassini T, Desarnaud F, DiPietro CP, Disner SG, Docherty AR, Domschke K, Dyb G, Kulenovic AD, Edenberg HJ, Evans A, Fabbri C, Fani N, Farrer LA, Feder A, Feeny NC, Flory JD, Forbes D, Franz CE, Galea S, Garrett ME, Gelaye B, Gelernter J, Geuze E, Gillespie CF, Goci A, Goleva SB, Gordon SD, Grasser LR, Guindalini C, Haas M, Hagenaaers S, Hauser MA, Heath AC, Hemmings SM, Hesselbrock V, Hickie IB, Hogan K, Hougaard DM, Huang H, Huckins LM, Hveem K, Jakovljevic M, Javanbakht A, Jenkins GD, Johnson J, Jones I, Jovanovic T, Karstoft KI, Kaufman ML, Kennedy JL, Kessler RC, Khan A, Kimbrel NA, King AP, Koen N, Kotov R, Kranzler HR, Krebs K, Kremen WS, Kuan PF, Lawford BR, Lebois LAM, Lehto K, Levey DF, Lewis C, Liberzon I, Linnstaedt SD, Logue MW, Lori A, Lu Y, Luft BJ, Lupton MK, Luykx JJ, Makotkine I, Maples-Keller JL, Marchese S, Marmar C, Martin NG, Martínez-Levy GA, McAloney K, McFarlane A, McLaughlin KA, McLean SA, Medland SE, Mehta D, Meyers J, Michopoulos V, Mikita EA, Milani L, Milberg W, Miller MW, Morey RA, Morris CP, Mors O, Mortensen PB, Mufford MS, Nelson EC, Nordentoft M, Norman SB, Nugent NR, O'Donnell M, Orcutt HK, Pan PM, Panizzon MS, Pathak GA, Peters ES, Peterson AL, Peverill M, Pietrzak RH, Polusny MA, Porjesz B, Powers A, Qin XJ, Ratanatharathorn A, Risbrough VB, Roberts AL, Rothbaum BO, Rothbaum AO, Roy-Byrne P, Ruggiero KJ, Rung A, Runz H, Rutten BPF, de Viteri SS, Salum GA, Sampson L, Sanchez SE, Santoro M, Seah C, Seedat S, Seng JS, Shabalin A, Sheerin CM, Silove D, Smith AK, Smoller JW, Sponheim SR, Stein DJ, Stensland S, Stevens JS, Sumner JA, Teicher MH, Thompson WK, Tiwari AK, Trapido E, Uddin M, Ursano RJ, Valdimarsdóttir U, van den Heuvel LL, Van Hooff M, van Rooij SJ, Vermetten E, Vinkers CH, Voisey J, Wang Z, Wang Y, Waszczuk M, Weber H, Wendt FR, Werge T, Williams MA, Williamson DE, Winsvold BS, Winternitz S, Wolf EJ, Wolf C, Xia Y, Xiong Y, Yehuda R, Young RM, Young KA, Zai CC, Zai GC, Zervas M, Zhao H, Zoellner LA, Zwart JA, Stein MB, Ressler KJ and Koenen KC. Discovery of 95 PTSD loci provides insight into genetic architecture and neurobiology of trauma and stress-related disorders. *medRxiv*. 2023.

40. Verma A, Huffman JE, Rodriguez A, Conery M, Liu M, Ho Y-L, Kim Y, Heise DA, Guare L, Panickan VA, Garcon H, Linares F, Costa L, Goethert I, Tipton R, Honerlaw J, Davies L, Whitbourne S, Cohen J, Posner DC, Sangar R, Murray M, Wang X, Dochtermann DR, Devineni P, Shi Y, Nandi TN, Assimes TL, Brunette CA, Carroll RJ, Clifford R, Duvall S, Gelernter J, Hung A, Iyengar SK, Joseph J, Kember R, Kranzler H, Kripke CM, Levey D, Luoh S-W, Merritt VC, Overstreet C, Deak JD, Grant SFA, Polimanti R, Roussos P, Shakt G, Sun YV, Tsao N, Venkatesh S, Voloudakis G, Justice A, Begoli E, Ramoni R, Tourassi G, Pyarajan S, Tsao P, O'Donnell CJ, Muralidhar S, Moser J, Casas JP, Bick AG, Zhou W, Cai T, Voight BF, Cho K, Gaziano JM, Madduri RK, Damrauer S and Liao KP. Diversity and scale: Genetic architecture of 2068 traits in the VA Million Veteran Program. *Science*. 2024;385:eadj1182.

41. Gaziano JM, Concato J, Brophy M, Fiore L, Pyarajan S, Breeling J, Whitbourne S, Deen J, Shannon C, Humphries D, Guarino P, Aslan M, Anderson D, LaFleur R, Hammond

- T, Schaa K, Moser J, Huang G, Muralidhar S, Przygodzki R and O'Leary TJ. Million Veteran Program: A mega-biobank to study genetic influences on health and disease. *J Clin Epidemiol.* 2016;70:214-23.
42. Bastarache L. Using Phecodes for Research with the Electronic Health Record: From PheWAS to PheRS. *Annu Rev Biomed Data Sci.* 2021;4:1-19.
43. Bycroft C, Freeman C, Petkova D, Band G, Elliott LT, Sharp K, Motyer A, Vukcevic D, Delaneau O, O'Connell J, Cortes A, Welsh S, Young A, Effingham M, McVean G, Leslie S, Allen N, Donnelly P and Marchini J. The UK Biobank resource with deep phenotyping and genomic data. *Nature.* 2018;562:203-209.
44. Karczewski KJ, Gupta R, Kanai M, Lu W, Tsuo K, Wang Y, Walters RK, Turley P, Callier S, Baya N, Palmer DS, Goldstein JL, Sarma G, Solomonson M, Cheng N, Bryant S, Churchhouse C, Cusick CM, Poterba T, Compitello J, King D, Zhou W, Seed C, Finucane HK, Daly MJ, Neale BM, Atkinson EG and Martin AR. Pan-UK Biobank GWAS improves discovery, analysis of genetic architecture, and resolution into ancestry-enriched effects. *medRxiv.* 2024:2024.03.13.24303864.
45. Willer CJ, Li Y and Abecasis GR. METAL: fast and efficient meta-analysis of genomewide association scans. *Bioinformatics.* 2010;26:2190-1.
46. Wingo AP, Liu Y, Gerasimov ES, Gockley J, Logsdon BA, Duong DM, Dammer EB, Robins C, Beach TG, Reiman EM, Epstein MP, De Jager PL, Lah JJ, Bennett DA, Seyfried NT, Levey AI and Wingo TS. Integrating human brain proteomes with genome-wide association data implicates new proteins in Alzheimer's disease pathogenesis. *Nat Genet.* 2021;53:143-146.
47. Zhang J, Dutta D, Köttgen A, Tin A, Schlosser P, Grams ME, Harvey B, Yu B, Boerwinkle E, Coresh J and Chatterjee N. Plasma proteome analyses in individuals of European and African ancestry identify cis-pQTLs and models for proteome-wide association studies. *Nat Genet.* 2022;54:593-602.
48. Sun BB, Chiou J, Traylor M, Benner C, Hsu YH, Richardson TG, Surendran P, Mahajan A, Robins C, Vasquez-Grinnell SG, Hou L, Kvikstad EM, Burren OS, Davitte J, Ferber KL, Gillies CE, Hedman Å K, Hu S, Lin T, Mikkilineni R, Pendergrass RK, Pickering C, Prins B, Baird D, Chen CY, Ward LD, Deaton AM, Welsh S, Willis CM, Lehner N, Arnold M, Wörheide MA, Suhre K, Kastenmüller G, Sethi A, Cule M, Raj A, Burkitt-Gray L, Melamud E, Black MH, Fauman EB, Howson JMM, Kang HM, McCarthy MI, Nioi P, Petrovski S, Scott RA, Smith EN, Szalma S, Waterworth DM, Mitnau LJ, Szustakowski JD, Gibson BW, Miller MR and Whelan CD. Plasma proteomic associations with genetics and health in the UK Biobank. *Nature.* 2023;622:329-338.
49. Watanabe K, Taskesen E, van Bochoven A and Posthuma D. Functional mapping and annotation of genetic associations with FUMA. *Nat Commun.* 2017;8:1826.
50. Werme J, van der Sluis S, Posthuma D and de Leeuw CA. An integrated framework for local genetic correlation analysis. *Nat Genet.* 2022;54:274-282.
51. Giambartolomei C, Vukcevic D, Schadt EE, Franke L, Hingorani AD, Wallace C and Plagnol V. Bayesian test for colocalisation between pairs of genetic association studies using summary statistics. *PLoS Genet.* 2014;10:e1004383.
52. Wallace C. Eliciting priors and relaxing the single causal variant assumption in colocalisation analyses. *PLoS Genet.* 2020;16:e1008720.

53. Ghoussaini M, Mountjoy E, Carmona M, Peat G, Schmidt EM, Hercules A, Fumis L, Miranda A, Carvalho-Silva D, Buniello A, Burdett T, Hayhurst J, Baker J, Ferrer J, Gonzalez-Uriarte A, Jupp S, Karim MA, Koscielny G, Machlitt-Northen S, Malangone C, Pendlington ZM, Roncaglia P, Suveges D, Wright D, Vrousseau O, Papa E, Parkinson H, MacArthur JAL, Todd JA, Barrett JC, Schwartzentruber J, Hulcoop DG, Ochoa D, McDonagh EM and Dunham I. Open Targets Genetics: systematic identification of trait-associated genes using large-scale genetics and functional genomics. *Nucleic Acids Res.* 2021;49:D1311-D1320.
54. Bick AG, Metcalf GA, Mayo KR, Lichtenstein L, Rura S, Carroll RJ, Musick A, Linder JE, Jordan IK, Nagar SD, Sharma S, Meller R, Basford M, Boerwinkle E, Cicek MS, Doheny KF, Eichler EE, Gabriel S, Gibbs RA, Glazer D, Harris PA, Jarvik GP, Philippakis A, Rehm HL, Roden DM, Thibodeau SN, Topper S, Blegen AL, Wirkus SJ, Wagner VA, Meyer JG, Cicek MS, Muzny DM, Venner E, Mawhinney MZ, Griffith SML, Hsu E, Ling H, Adams MK, Walker K, Hu J, Doddapaneni H, Kovar CL, Murugan M, Dugan S, Khan Z, Boerwinkle E, Lennon NJ, Austin-Tse C, Banks E, Gatzen M, Gupta N, Henricks E, Larsson K, McDonough S, Harrison SM, Kachulis C, Lebo MS, Neben CL, Steeves M, Zhou AY, Smith JD, Frazar CD, Davis CP, Patterson KE, Wheeler MM, McGee S, Lockwood CM, Shirts BH, Pritchard CC, Murray ML, Vasta V, Leistriz D, Richardson MA, Buchan JG, Radhakrishnan A, Krumm N, Ehmen BW, Schwartz S, Aster MMT, Cibulskis K, Haessly A, Asch R, Cremer A, Degatano K, Shergill A, Gauthier LD, Lee SK, Hatcher A, Grant GB, Brandt GR, Covarrubias M, Banks E, Able A, Green AE, Carroll RJ, Zhang J, Condon HR, Wang Y, Dillon MK, Albach CH, Baalawi W, Choi SH, Wang X, Rosenthal EA, Ramirez AH, Lim S, Nambiar S, Ozenberger B, Wise AL, Lunt C, Ginsburg GS, Denny JC, The All of Us Research Program Genomics I, Manuscript Writing G, All of Us Research Program Genomics Principal I, Biobank M, Genome Center: Baylor-Hopkins Clinical Genome C, Genome Center: Broad C, Mass General Brigham Laboratory for Molecular M, Genome Center: University of W, Data, Research C, All of Us Research Demonstration Project T and Staff NIHAoURP. Genomic data in the All of Us Research Program. *Nature.* 2024;627:340-346.
55. Gusev A, Ko A, Shi H, Bhatia G, Chung W, Penninx BW, Jansen R, de Geus EJ, Boomsma DI, Wright FA, Sullivan PF, Nikkola E, Alvarez M, Civelek M, Lusi AJ, Lehtimäki T, Raitoharju E, Kähönen M, Seppälä I, Raitakari OT, Kuusisto J, Laakso M, Price AL, Pajukanta P and Pasaniuc B. Integrative approaches for large-scale transcriptome-wide association studies. *Nat Genet.* 2016;48:245-52.
56. Zhu Z, Zhang F, Hu H, Bakshi A, Robinson MR, Powell JE, Montgomery GW, Goddard ME, Wray NR, Visscher PM and Yang J. Integration of summary data from GWAS and eQTL studies predicts complex trait gene targets. *Nat Genet.* 2016;48:481-487.
57. Zhu Z, Zhang F, Hu H, Bakshi A, Robinson MR, Powell JE, Montgomery GW, Goddard ME, Wray NR, Visscher PM and Yang J. Integration of summary data from GWAS and eQTL studies predicts complex trait gene targets. *Nat Genet.* 2016;48:481-7.
58. Kolberg L, Raudvere U, Kuzmin I, Adler P, Vilo J and Peterson H. g:Profiler-interoperable web service for functional enrichment analysis and gene identifier mapping (2023 update). *Nucleic Acids Res.* 2023;51:W207-W212.
59. Cannon M, Stevenson J, Stahl K, Basu R, Coffman A, Kiwala S, McMichael JF, Kuzma K, Morrissey D, Cotto K, Mardis ER, Griffith OL, Griffith M and Wagner AH. DGIdb 5.0:

rebuilding the drug-gene interaction database for precision medicine and drug discovery platforms. *Nucleic Acids Res.* 2024;52:D1227-D1235.

60. Basquez R PM. Prazosin: StatPearls. *StatPearls Publishing.* 2024.

61. Paiva HS, Filho IJZ and Cais C. Using Prazosin to Treat Posttraumatic Stress Disorder and Associations: A Systematic Review. *Psychiatry Investig.* 2021;18:365-372.

62. Cohagan B BD. Torsade de Pointes. In: StatPearls [Internet]. Treasure Island (FL): StatPearls Publishing; 2024 Jan-. Update 2023 Aug 8th.

63. Dalvie S, Chatzinakos C, Al Zoubi O, Georgiadis F, workgroup P-PSB, Lancashire L and Daskalakis NP. From genetics to systems biology of stress-related mental disorders. *Neurobiol Stress.* 2021;15:100393.

64. Sokolov AV, Manu DM, Nordberg DOT, Bostrom ADE, Jokinen J and Schioth HB. Methylation in MAD1L1 is associated with the severity of suicide attempt and phenotypes of depression. *Clin Epigenetics.* 2023;15:1.

65. Pathak GA, Singh K, Wendt FR, Fleming TW, Overstreet C, Koller D, Tylee DS, De Angelis F, Cabrera Mendoza B, Levey DF, Koenen KC, Krystal JH, Pietrzak RH, C OD, Gaziano JM, Falcone G, Stein MB, Gelernter J, Pasaniuc B, Mancuso N, Davis LK and Polimanti R. Genetically regulated multi-omics study for symptom clusters of posttraumatic stress disorder highlights pleiotropy with hematologic and cardio-metabolic traits. *Mol Psychiatry.* 2022;27:1394-1404.

66. Huang RDL, Nguyen XT, Peloso GM, Trinder M, Posner DC, Aragam KG, Ho YL, Lynch JA, Damrauer SM, Chang KM, Tsao PS, Natarajan P, Assimes T, Gaziano JM, Djousse L, Cho K, Wilson PWF, Huffman JE, O'Donnell CJ and Veterans Affairs' Million Veteran P. Genome-wide and phenome-wide analysis of ideal cardiovascular health in the VA Million Veteran Program. *PLoS ONE.* 2022;17:e0267900.

67. Bharti V, Bhardwaj A, Elias DA, Metcalfe AWS and Kim JS. A Systematic Review and Meta-Analysis of Lipid Signatures in Post-traumatic Stress Disorder. *Front Psychiatry.* 2022;13:847310.

68. Zheng Q, Ma Y, Chen S, Che Q, Zhou Z and Chen D. Identification of genetic loci jointly influencing coronary artery disease risk and sleep traits of insomnia, sleep duration, and chronotype. *Sleep Med.* 2020;74:116-123.

69. Hanscombe KB, Persyn E, Traylor M, Glanville KP, Hamer M, Coleman JRI and Lewis CM. The genetic case for cardiorespiratory fitness as a clinical vital sign and the routine prescription of physical activity in healthcare. *Genome Medicine.* 2021;13:180.

70. Teumer A, Chaker L, Groeneweg S, Li Y, Di Munno C, Barbieri C, Schultheiss UT, Traglia M, Ahluwalia TS, Akiyama M, Appel EVR, Arking DE, Arnold A, Astrup A, Beekman M, Beilby JP, Bekaert S, Boerwinkle E, Brown SJ, De Buyzere M, Campbell PJ, Ceresini G, Cerqueira C, Cucca F, Deary IJ, Deelen J, Eckardt KU, Ekici AB, Eriksson JG, Ferrucci L, Fiers T, Fiorillo E, Ford I, Fox CS, Fuchsberger C, Galesloot TE, Gieger C, Gögele M, De Grandi A, Grarup N, Greiser KH, Haljas K, Hansen T, Harris SE, van Heemst D, den Heijer M, Hicks AA, den Hollander W, Homuth G, Hui J, Ikram MA, Ittermann T, Jensen RA, Jing J, Jukema JW, Kajantie E, Kamatani Y, Kasbohm E, Kaufman JM, Kiemeny LA, Kloppenburg M, Kronenberg F, Kubo M, Lahti J, Lapauw B, Li S, Liewald DCM, Lim EM, Linneberg A, Marina M, Mascalzoni D, Matsuda K, Medenwald D, Meisinger C, Meulenbelt I, De Meyer T, Meyer Zu Schwabedissen HE, Mikolajczyk R, Moed M, Netea-Maier RT, Nolte IM, Okada Y,



Pala M, Pattaro C, Pedersen O, Petersmann A, Porcu E, Postmus I, Pramstaller PP, Psaty BM, Ramos YFM, Rawal R, Redmond P, Richards JB, Rietzschel ER, Rivadeneira F, Roef G, Rotter JI, Sala CF, Schlessinger D, Selvin E, Slagboom PE, Soranzo N, Sørensen TIA, Spector TD, Starr JM, Stott DJ, Taes Y, Taliun D, Tanaka T, Thuesen B, Tiller D, Toniolo D, Uitterlinden AG, Visser WE, Walsh JP, Wilson SG, Wolffenbuttel BHR, Yang Q, Zheng HF, Cappola A, Peeters RP, Naitza S, Völzke H, Sanna S, Köttgen A, Visser TJ and Medici M. Genome-wide analyses identify a role for SLC17A4 and AADAT in thyroid hormone regulation. *Nat Commun*. 2018;9:4455.

71. Yin Y, Tan M, Han L, Zhang L, Zhang Y, Zhang J, Pan W, Bai J, Jiang T and Li H. The hippo kinases MST1/2 in cardiovascular and metabolic diseases: A promising therapeutic target option for pharmacotherapy. *Acta Pharm Sin B*. 2023;13:1956-1975.

72. Yan Y, Xu X, Chen R, Wu S, Yang Z, Wang H and Zhang T. Down-regulation of MST1 in hippocampus protects against stress-induced depression-like behaviours and synaptic plasticity impairments. *Brain Behav Immun*. 2021;94:196-209.

73. Bidwell LC, McGeary JE, Gray JC, Palmer RH, Knopik VS and MacKillop J. NCAM1-TTC12-ANKK1-DRD2 variants and smoking motives as intermediate phenotypes for nicotine dependence. *Psychopharmacology (Berl)*. 2015;232:1177-86.

74. Li Y, Cho H, Wang F, Canela-Xandri O, Luo C, Rawlik K, Archacki S, Xu C, Tenesa A, Chen Q and Wang QK. Statistical and Functional Studies Identify Epistasis of Cardiovascular Risk Genomic Variants From Genome-Wide Association Studies. *J Am Heart Assoc*. 2020;9:e014146.

75. Yamada Y, Yasukochi Y, Kato K, Oguri M, Horibe H, Fujimaki T, Takeuchi I and Sakuma J. Identification of 26 novel loci that confer susceptibility to early-onset coronary artery disease in a Japanese population. *Biomed Rep*. 2018;9:383-404.

76. Vujkovic M, Keaton JM, Lynch JA, Miller DR, Zhou J, Tcheandjieu C, Huffman JE, Assimes TL, Lorenz K, Zhu X, Hilliard AT, Judy RL, Huang J, Lee KM, Klarin D, Pyarajan S, Danesh J, Melander O, Rasheed A, Mallick NH, Hameed S, Qureshi IH, Afzal MN, Malik U, Jalal A, Abbas S, Sheng X, Gao L, Kaestner KH, Susztak K, Sun YV, DuVall SL, Cho K, Lee JS, Gaziano JM, Phillips LS, Meigs JB, Reaven PD, Wilson PW, Edwards TL, Rader DJ, Damrauer SM, O'Donnell CJ, Tsao PS, Atkinson MA, Powers AC, Naji A, Kaestner KH, Abecasis GR, Baras A, Cantor MN, Coppola G, Economides AN, Lotta LA, Overton JD, Reid JG, Shuldiner AR, Beechert C, Forsythe C, Fuller ED, Gu Z, Lattari M, Lopez AE, Schleicher TD, Padilla MS, Toledo K, Widom L, Wolf SE, Pradhan M, Manoochekri K, Ulloa RH, Bai X, Balasubramanian S, Barnard L, Blumenfeld AL, Eom G, Habegger L, Hawes A, Khalid S, Maxwell EK, Salerno WJ, Staples JC, Yadav A, Jones MB, Mitnaul LJ, Aguayo SM, Ahuja SK, Ballas ZK, Bhushan S, Boyko EJ, Cohen DM, Concato J, Constans JI, Dellitalia LJ, Fayad JM, Fernando RS, Florez HJ, Gaddy MA, Gappy SS, Gibson G, Godschalk M, Greco JA, Gupta S, Gutierrez S, Hammer KD, Hamner MB, Harley JB, Hung AM, Huq M, Hurley RA, Iruvanti PR, Ivins DJ, Jacono FJ, Jhala DN, Kaminsky LS, Kinlay S, Klein JB, Liangpunsakul S, Lichy JH, Mastorides SM, Mathew RO, Mattocks KM, McArdle R, Meyer PN, Meyer LJ, Moorman JP, Morgan TR, Murdoch M, Nguyen X-MT, Okusaga OO, Oursler K-AK, Ratcliffe NR, Rauchman MI, Robey RB, Ross GW, Servatius RJ, Sharma SC, Sherman SE, Sonel E, Sriram P, Stapley T, Striker RT, Tandon N, Villareal G, Wallbom AS, Wells JM, Whittle JC, Whooley MA, Xu J, Yeh S-S, Aslan M, Brewer JV, Brophy MT, Connor T, Argyres DP, Do NV, Hauser ER, Humphries DE,

Selva LE, Shayan S, Stephens B, Whitbourne SB, Zhao H, Moser J, Beckham JC, Breeling JL, Romero JPC, Huang GD, Ramoni RB, Pyarajan S, Sun YV, Cho K, Wilson PW, O'Donnell CJ, Tsao PS, Chang K-M, Gaziano JM, Muralidhar S, Chang K-M, Voight BF, Saleheen D, The HC, Regeneron Genetics C and Program VAMV. Discovery of 318 new risk loci for type 2 diabetes and related vascular outcomes among 1.4 million participants in a multi-ancestry meta-analysis. *Nature Genetics*. 2020;52:680-691.

77. Andrade S, Morais T, Sandovici I, Seabra AL, Constância M and Monteiro MP. Adipose Tissue Epigenetic Profile in Obesity-Related Dysglycemia - A Systematic Review. *Front Endocrinol (Lausanne)*. 2021;12:681649.

78. Aurich S, Müller L, Kovacs P and Keller M. Implication of DNA methylation during lifestyle mediated weight loss. *Front Endocrinol (Lausanne)*. 2023;14:1181002.

79. Dave J, Jagana V, Janostiak R and Bissierier M. Unraveling the epigenetic landscape of pulmonary arterial hypertension: implications for personalized medicine development. *J Transl Med*. 2023;21:477.

80. Huang X, Ye Q, Zhang Y, Chen Y, Li J, Sun J and Ye Z. Fine-Mapping of the PLCL2 Gene Identifies Candidate Variants Associated With Ischaemic Stroke Risk in Metabolic Syndrome Patients. *Front Neurol*. 2021;12:743169.

81. Liu ZW, Ma Q, Liu J, Li JW and Chen YD. The association between plasma furin and cardiovascular events after acute myocardial infarction. *BMC Cardiovasc Disord*. 2021;21:468.

82. Wang YK, Tang JN, Han L, Liu XD, Shen YL, Zhang CY and Liu XB. Elevated FURIN levels in predicting mortality and cardiovascular events in patients with acute myocardial infarction. *Metabolism*. 2020;111:154323.

83. Song W, Torous J, Kossowsky J, Chen CY, Huang H and Wright A. Genome-wide association analysis of insomnia using data from Partners Biobank. *Sci Rep*. 2020;10:6928.

84. Aryan L, Younessi D, Zargari M, Banerjee S, Agopian J, Rahman S, Borna R, Ruffenach G, Umar S and Eghbali M. The Role of Estrogen Receptors in Cardiovascular Disease. *Int J Mol Sci*. 2020;21.

85. Liu X, Chen L, Zhang Y, Wu X, Zhao Y, Wu X, Chen W, Wu C and Chen Y. Associations between polymorphisms of the CXCL12 and CNNM2 gene and hypertension risk: A case-control study. *Gene*. 2018;675:185-190.

86. Katrinli S, Oliveira NCS, Felger JC, Michopoulos V and Smith AK. The role of the immune system in posttraumatic stress disorder. *Transl Psychiatry*. 2022;12:313.

87. Sumner JA, Cleveland S, Chen T and Gradus JL. Psychological and biological mechanisms linking trauma with cardiovascular disease risk. *Translational Psychiatry*. 2023;13:25.

88. Kmita H, Pinna G and Lushchak VI. Potential oxidative stress related targets of mitochondria-focused therapy of PTSD. *Front Physiol*. 2023;14:1266575.

89. Wen Y, Li B, Han F, Wang E and Shi Y. Dysfunction of calcium/calmodulin/CaM kinase IIa cascades in the medial prefrontal cortex in post-traumatic stress disorder. *Mol Med Rep*. 2012;6:1140-4.

90. Ghigo A, Laffargue M, Li M and Hirsch E. PI3K and Calcium Signaling in Cardiovascular Disease. *Circ Res*. 2017;121:282-292.

91. Wilson MA, Liberzon I, Lindsey ML, Lokshina Y, Risbrough VB, Sah R, Wood SK, Williamson JB and Spinale FG. Common pathways and communication between the brain and heart: connecting post-traumatic stress disorder and heart failure. *Stress*. 2019;22:530-547.
92. Edmondson D and von Kanel R. Post-traumatic stress disorder and cardiovascular disease. *Lancet Psychiatry*. 2017;4:320-329.
93. Natale G, Kritikos M, Kuan PF, Carr MA, Yang X, Yang Y, Kotov R, Bromet EJ, Clouston SAP and Luft BJ. Glial suppression and post-traumatic stress disorder: A cross-sectional study of 1,520 world trade center responders. *Brain Behav Immun Health*. 2023;30:100631.
94. Osman I, Wang L, Hu G, Zheng Z and Zhou J. GFAP (Glial Fibrillary Acidic Protein)-Positive Progenitor Cells Contribute to the Development of Vascular Smooth Muscle Cells and Endothelial Cells-Brief Report. *Arterioscler Thromb Vasc Biol*. 2020;40:1231-1238.
95. Neumann J, Hofmann B, Dhein S and Gergs U. Role of Dopamine in the Heart in Health and Disease. *Int J Mol Sci*. 2023;24.
96. Yamaguchi T, Sumida TS, Nomura S, Satoh M, Higo T, Ito M, Ko T, Fujita K, Sweet ME, Sanbe A, Yoshimi K, Manabe I, Sasaoka T, Taylor MRG, Toko H, Takimoto E, Naito AT and Komuro I. Cardiac dopamine D1 receptor triggers ventricular arrhythmia in chronic heart failure. *Nat Commun*. 2020;11:4364.
97. Gabriele S, Canali M, Lintas C, Sacco R, Tirindelli MC, Ricciardello A and Persico AM. Evidence that ITGB3 promoter variants increase serotonin blood levels by regulating platelet serotonin transporter trafficking. *Hum Mol Genet*. 2019;28:1153-1161.
98. Wong ML, Whelan F, Deloukas P, Whittaker P, Delgado M, Cantor RM, McCann SM and Licinio J. Phosphodiesterase genes are associated with susceptibility to major depression and antidepressant treatment response. *Proc Natl Acad Sci U S A*. 2006;103:15124-9.
99. Chen L, Liu K, Wang Y, Liu N, Yao M, Hu J, Wang G, Sun Y and Pan J. Phosphodiesterase-2 inhibitor reverses post-traumatic stress induced fear memory deficits and behavioral changes via cAMP/cGMP pathway. *Eur J Pharmacol*. 2021;891:173768.
100. Zhu X, Li W, Li Y, Xu W, Yuan Y, Zheng V, Zhang H, O'Donnell JM, Xu Y and Yin X. The antidepressant- and anxiolytic-like effects of resveratrol: Involvement of phosphodiesterase-4D inhibition. *Neuropharmacology*. 2019;153:20-31.
101. Sirugo G, Williams SM and Tishkoff SA. The Missing Diversity in Human Genetic Studies. *Cell*. 2019;177:1080.

# GWAS of PTSD

N=1,222,882 (EUR descent)

Nievergelt, et. al 2023

76 loci (autosomal)

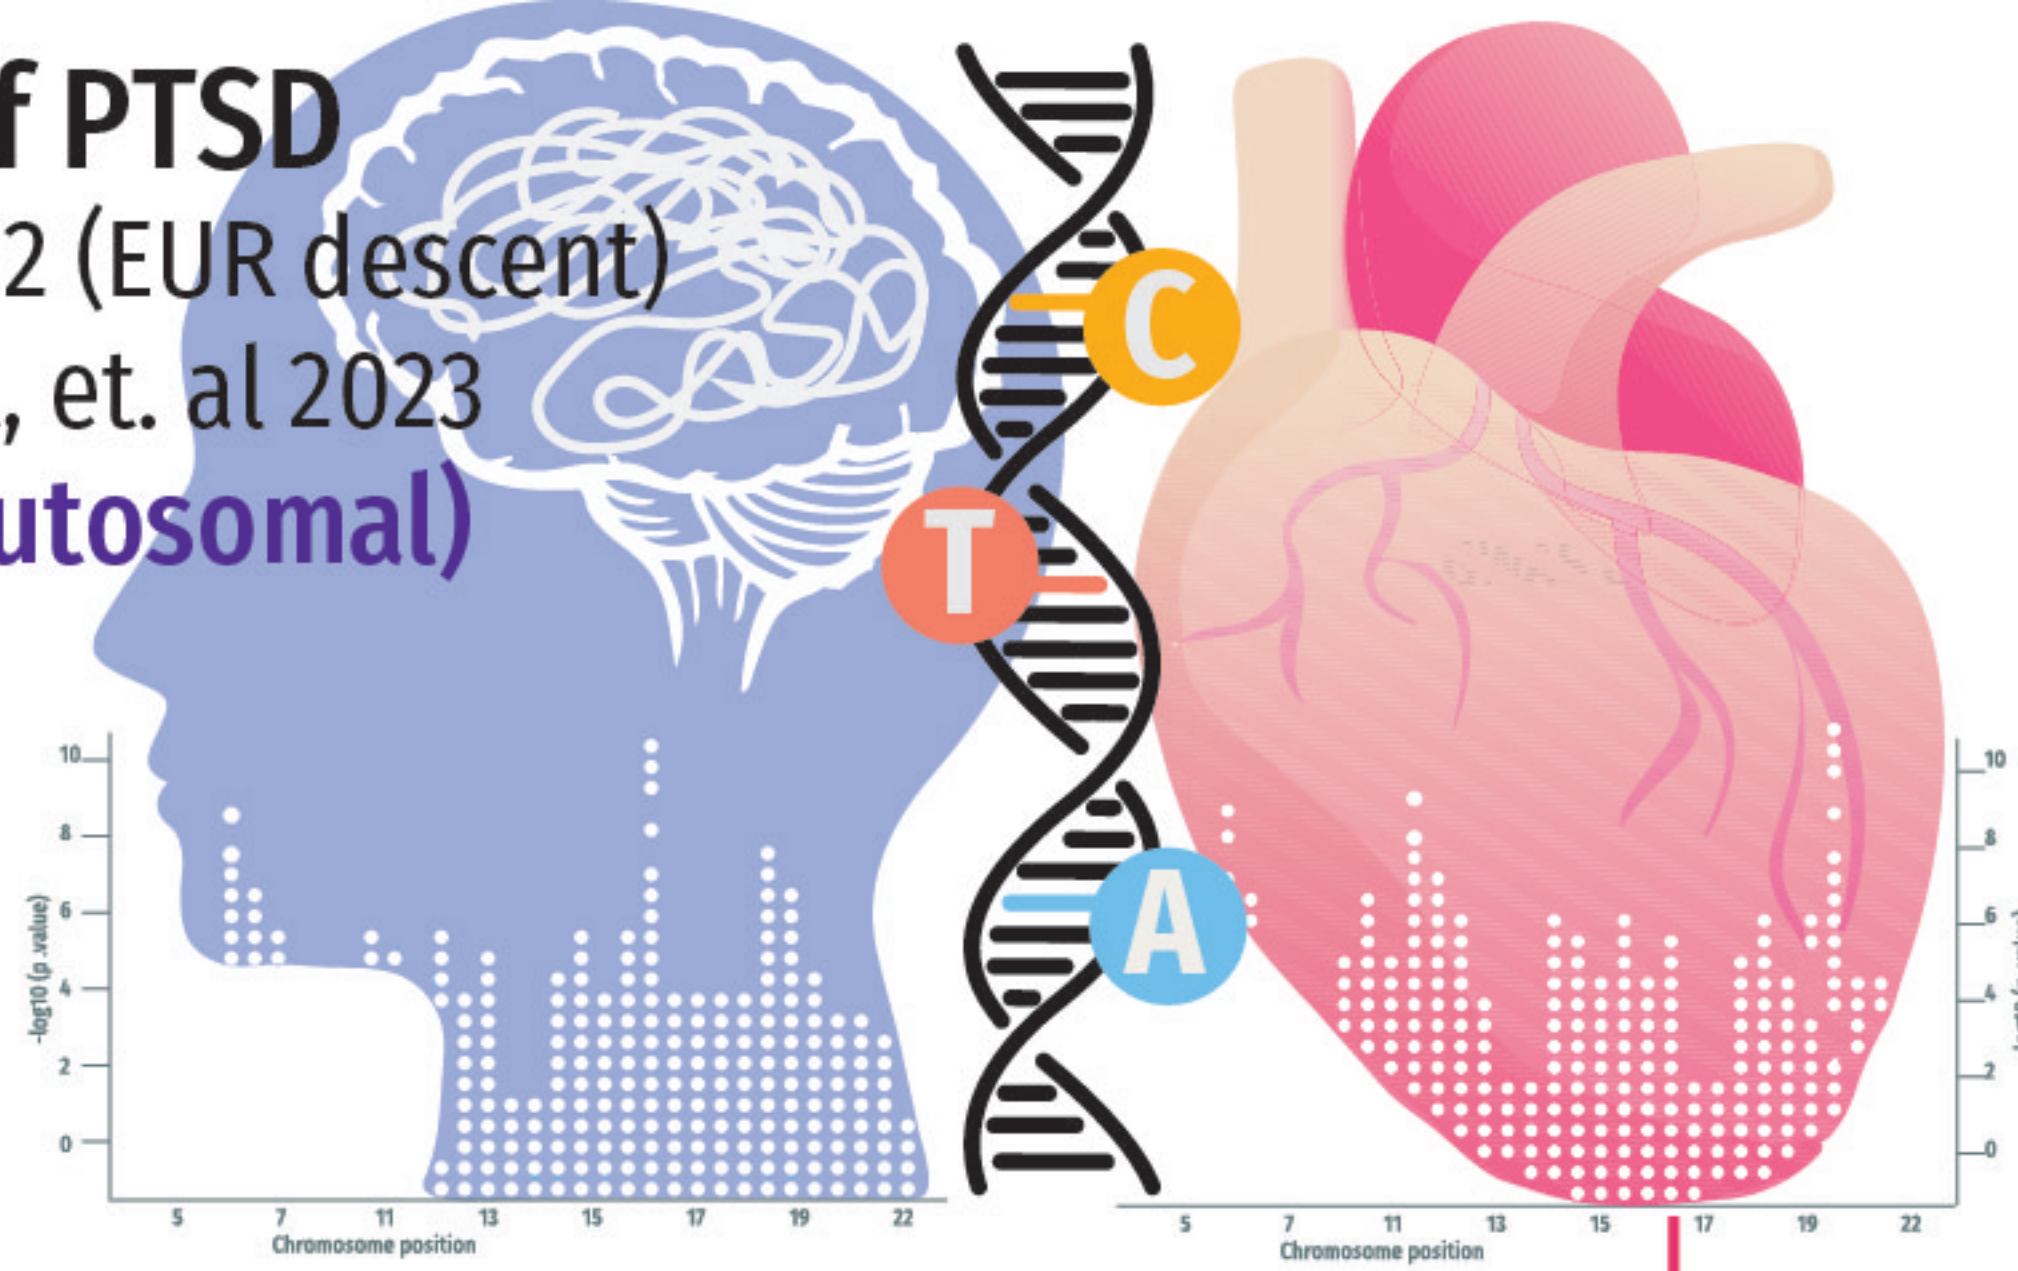

## American Heart Association's Life's Essential 8

### GWAS of

- Diet (N=282,271)
- Smoking (N= 842,717)
- Weight/BMI(N= 694,649)
- Type2Diabetes (N= 933,970)
- Physical Activity (N= 703,901)
- Insomnia (N= 633,838)
- Total Cholesterol (N=1,320,016)
- Hypertension (N=854,661)

## Electronic Health Records

### GWAS of Phecodes

- Circulatory category (141 traits)
  - Endo/metabolic category (105 traits)
- Million Veteran Program (N=458,061)  
UK Biobank (N=420,531)

## Heart Imaging

### GWAS of

- 82 cardiac imaging traits UK Biobank (N=26,893)

### Genetic correlation at locus

### colocalization between PTSD and Trait

### Genetic correlation at locus

### colocalization between PTSD and Trait

\* validation in UKBB-phecodes and self-reported definitions  
\*Epidemiological validation in AllofUS  
Meta-analysis (UKBB+MVP)

### Genetic correlation at locus

### colocalization between PTSD and Trait

Overlapping tissues based on transcriptome profiles of 205 tissues

Overlapping genes due to genetically regulated proteome expression

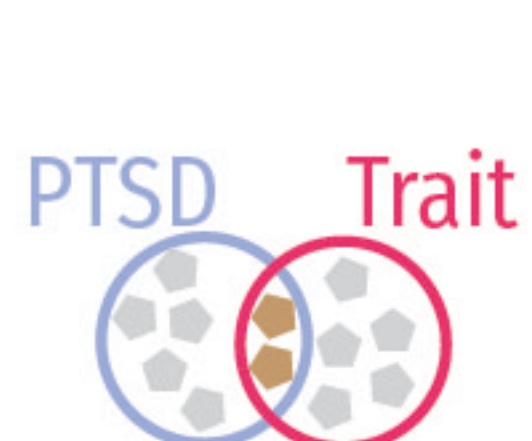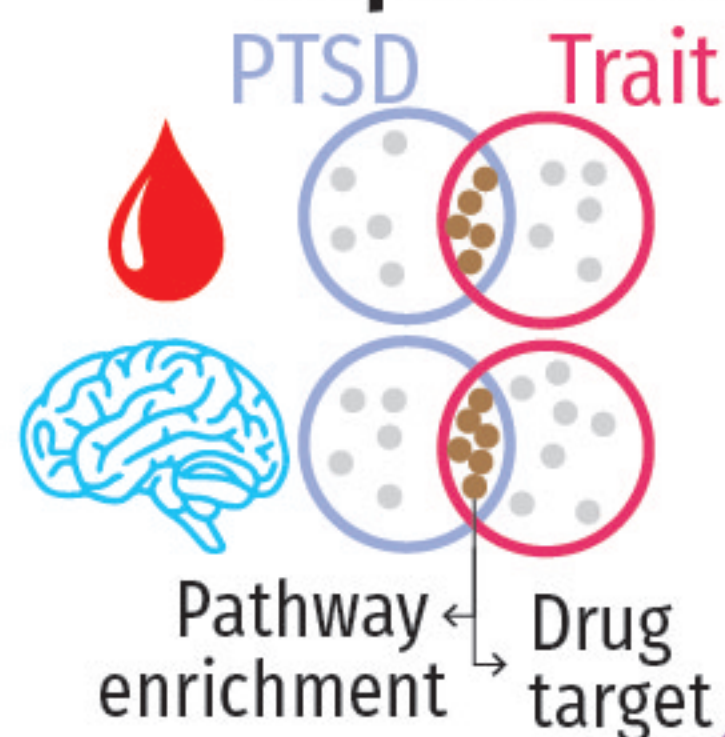

Overlapping tissues based on transcriptome profiles of 205 tissues

Overlapping gene due to genetically regulated proteome expression

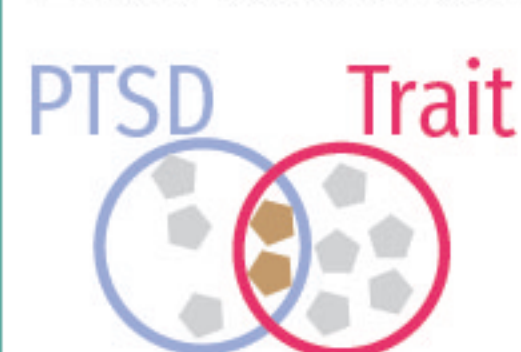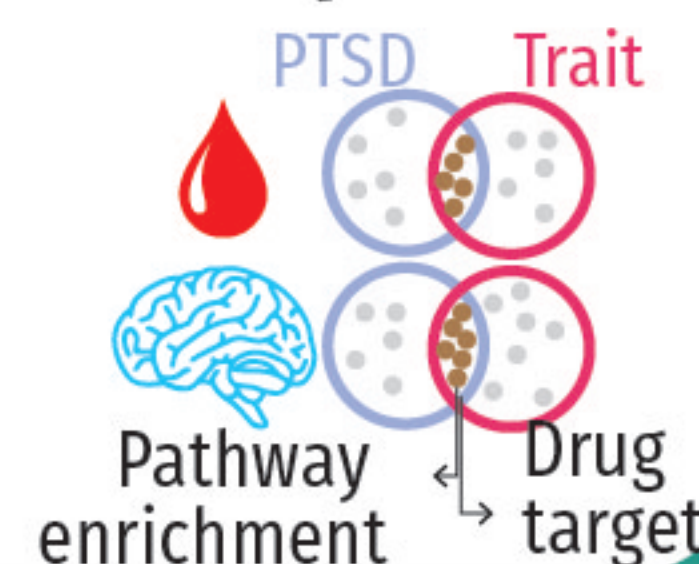

Overlapping tissues based on transcriptome profiles of 205 tissues

Overlapping genes due to genetically regulated proteome expression

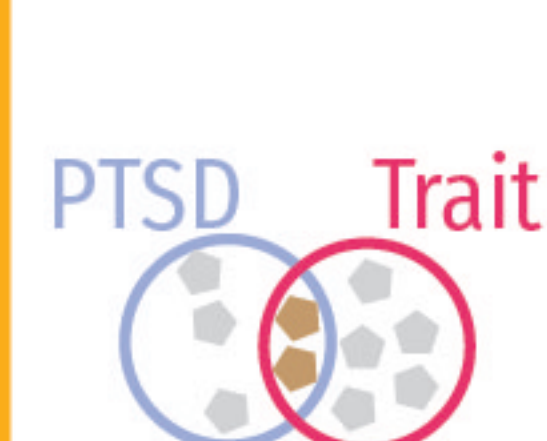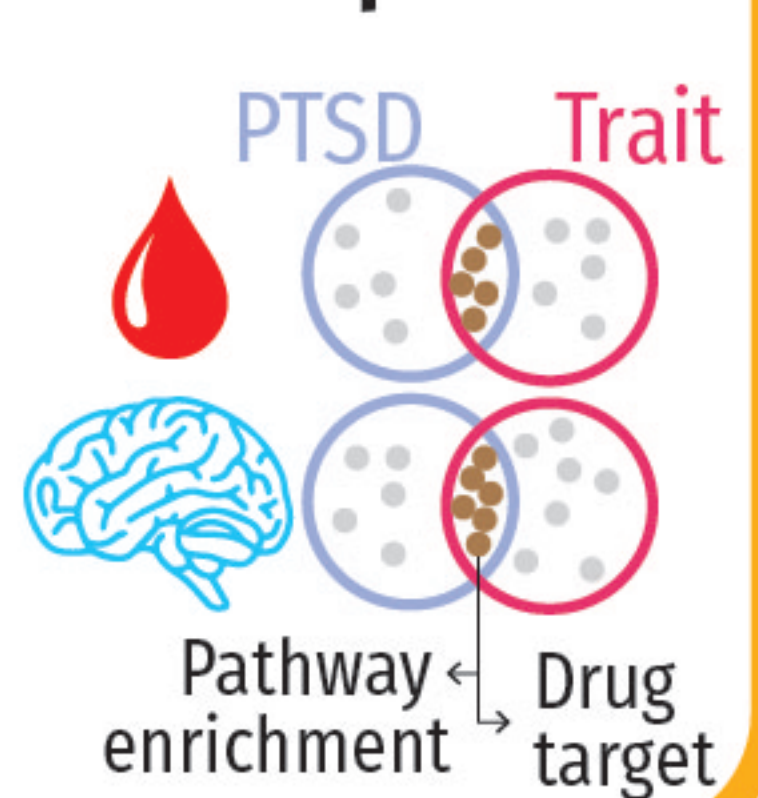

Identification of loci

Identification of genes

bioRxiv preprint doi: <https://doi.org/10.1101/2023.08.15.554122>; this version posted August 15, 2023. The copyright holder for this preprint (which was not certified by peer review) is the author/funder, who has granted bioRxiv a license to display the preprint in perpetuity. It is made available under aCC-BY-NC-ND 4.0 International license.

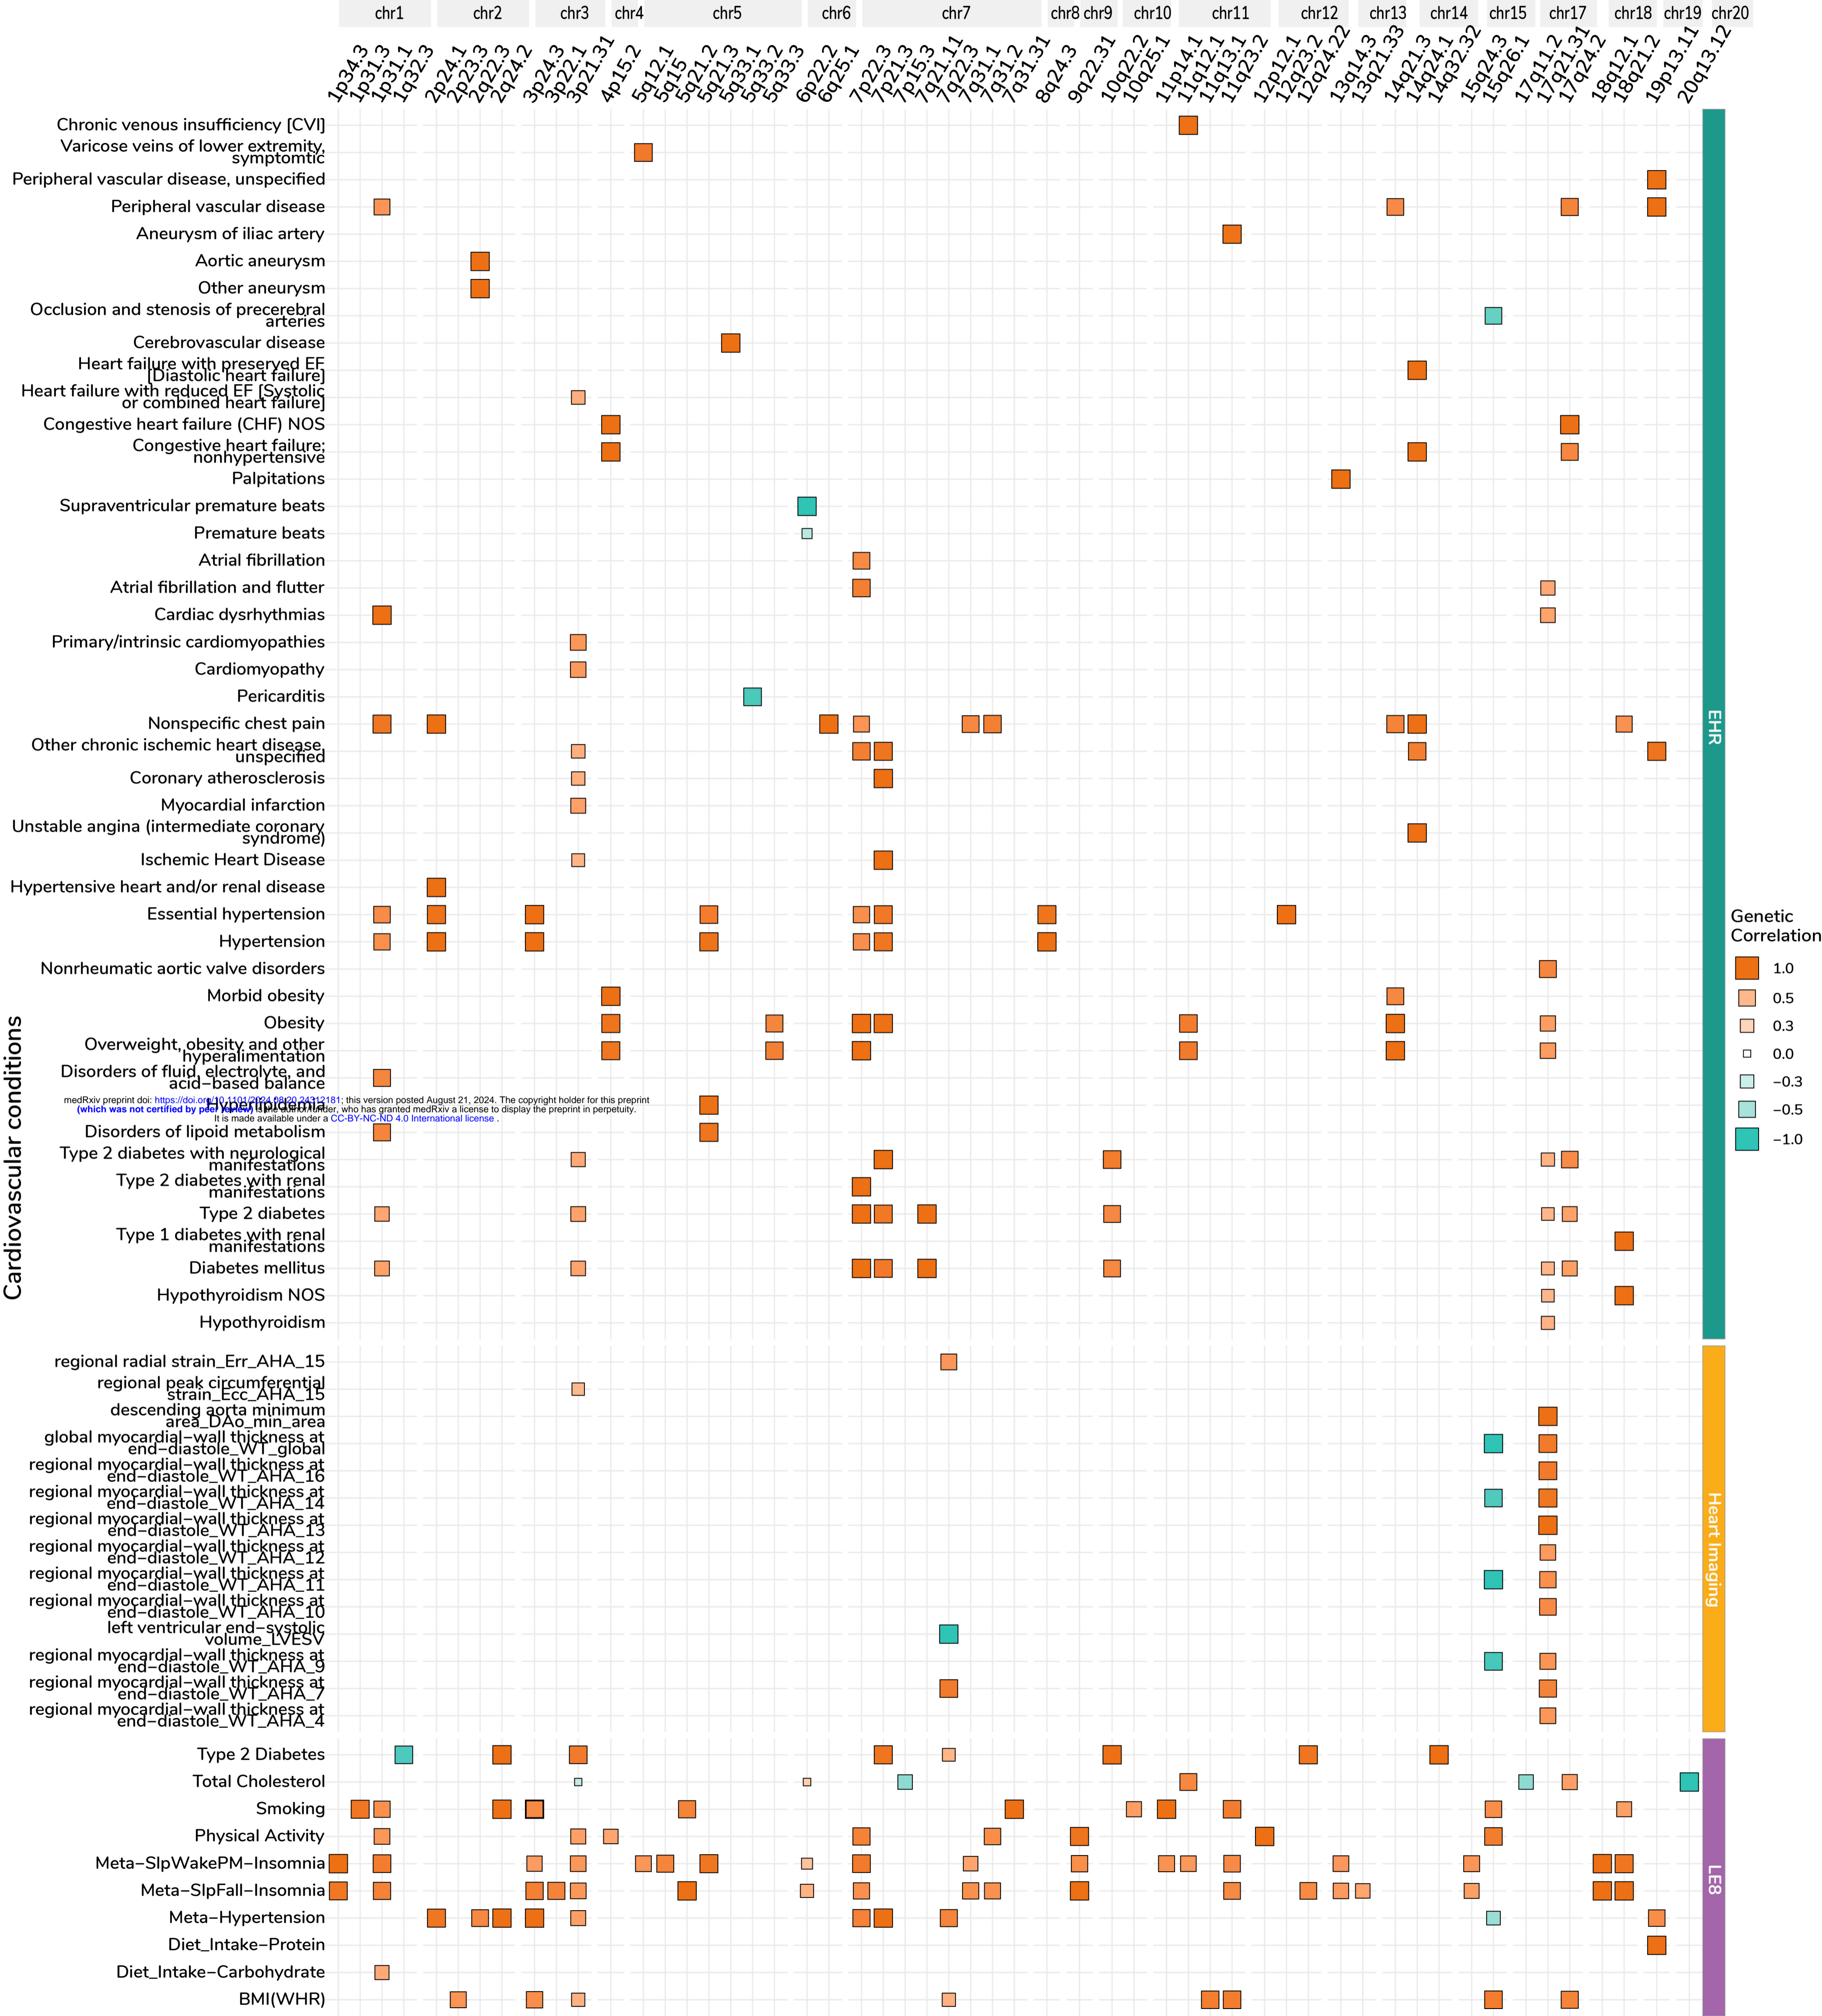

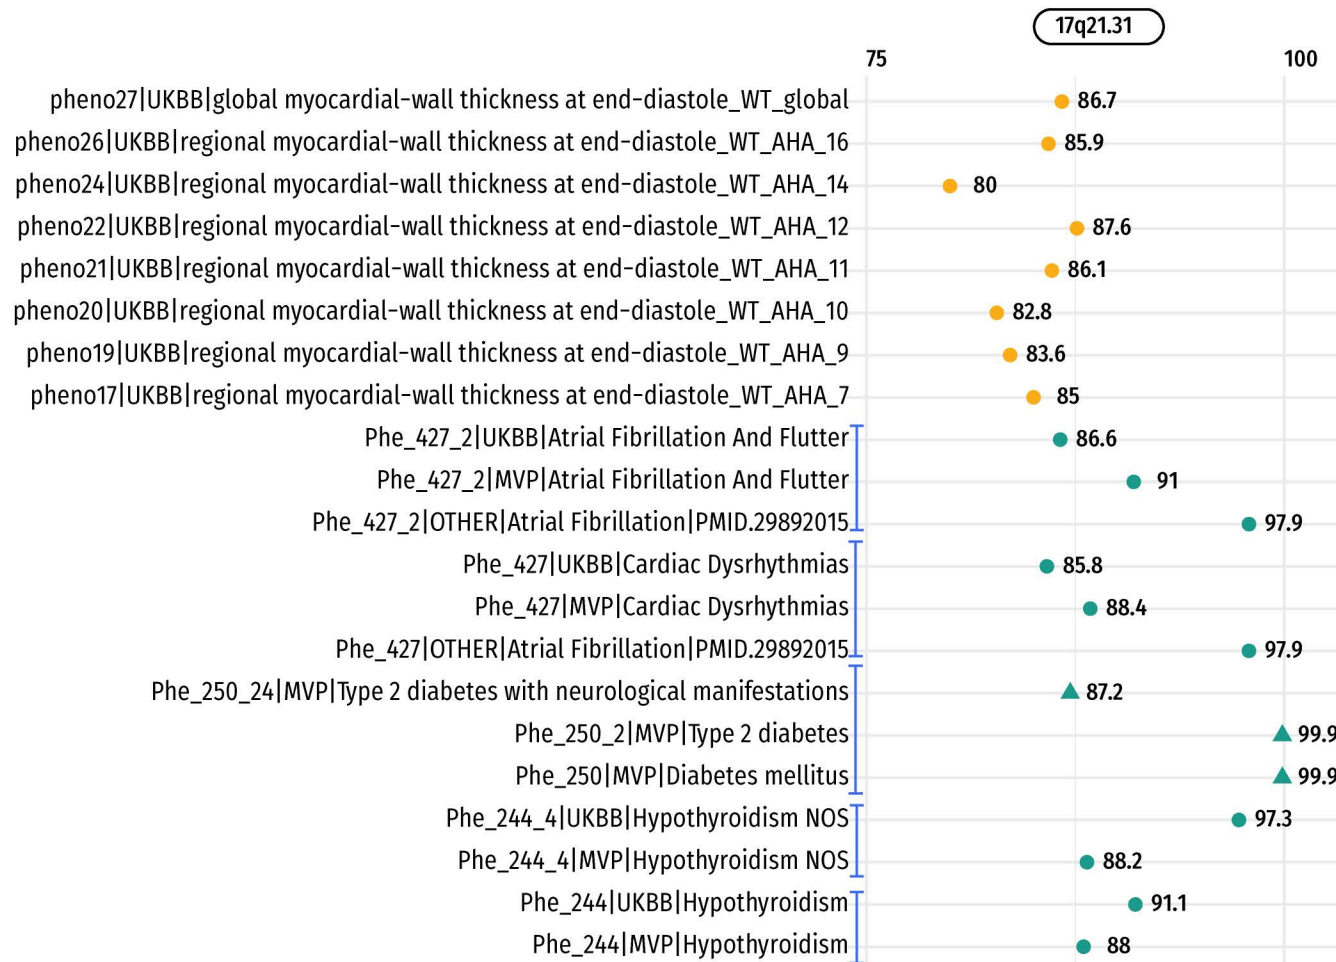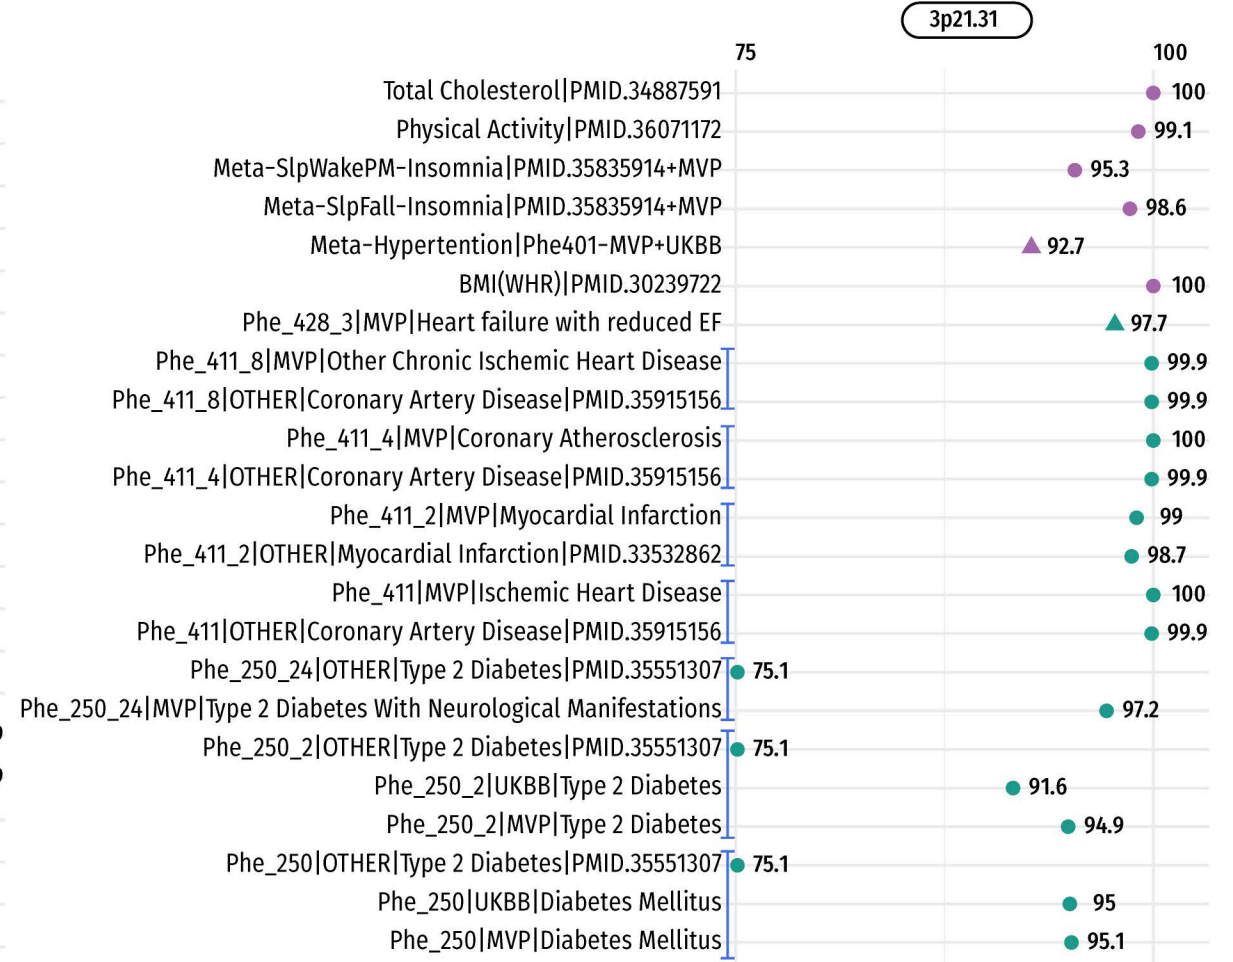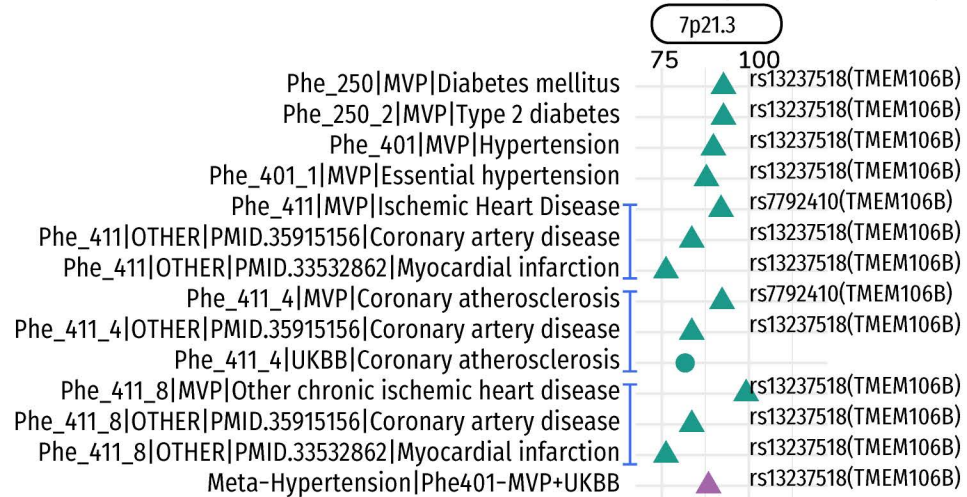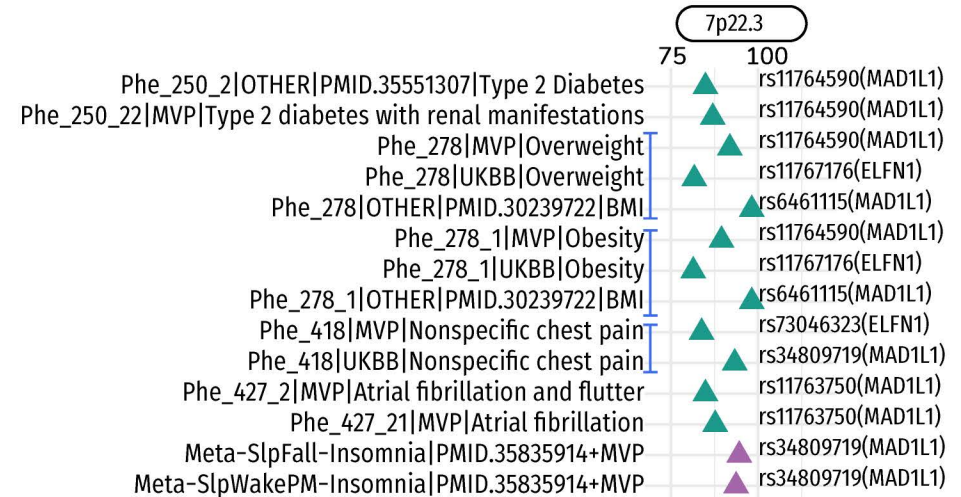

cardiovascular conditions

4p15.2

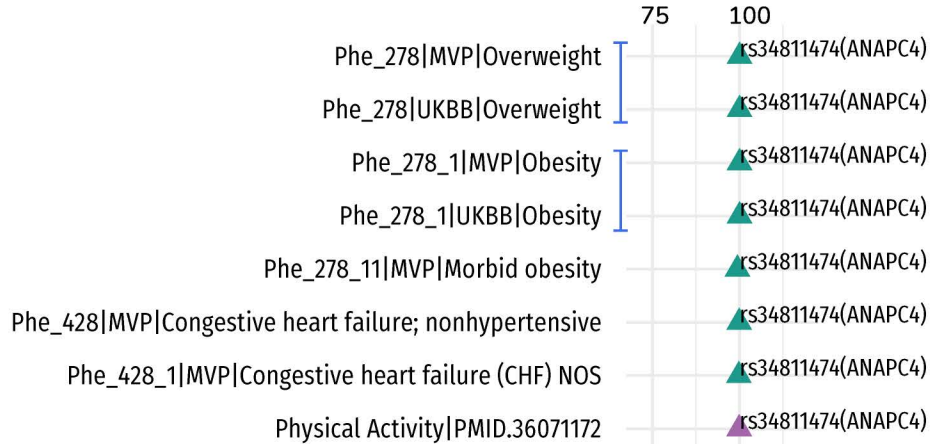

17q24.2

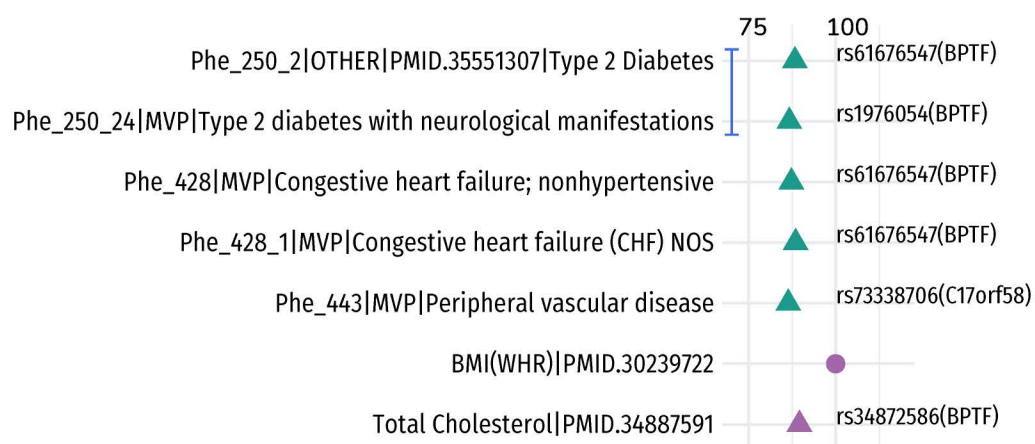

19p13.11

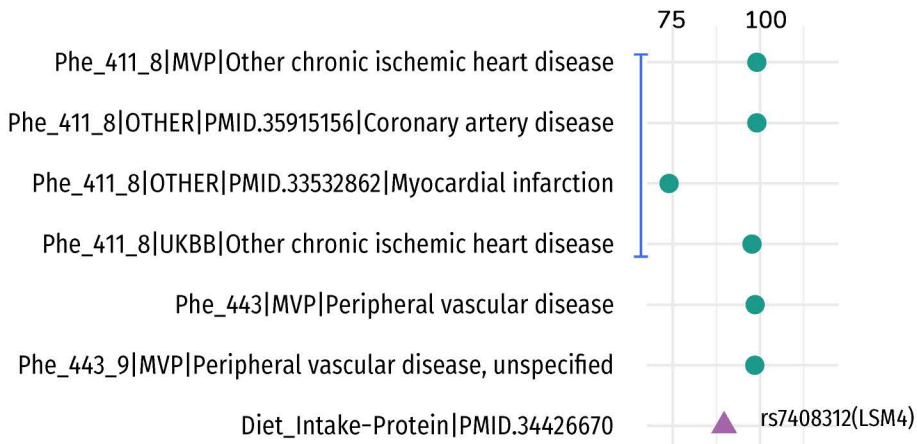

1p31.1

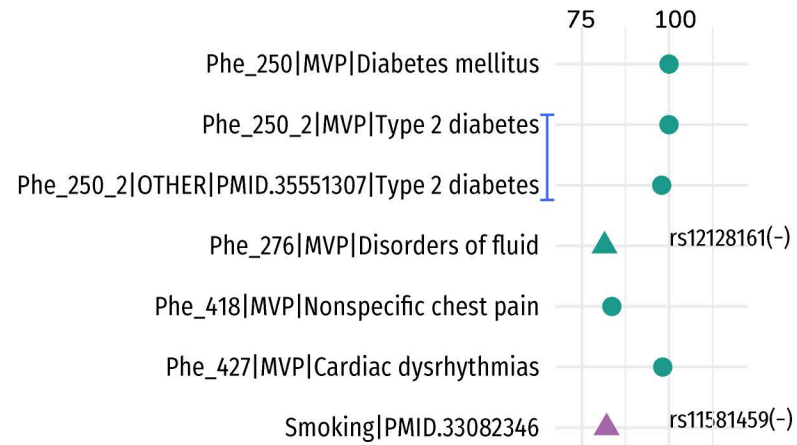

3p24.3

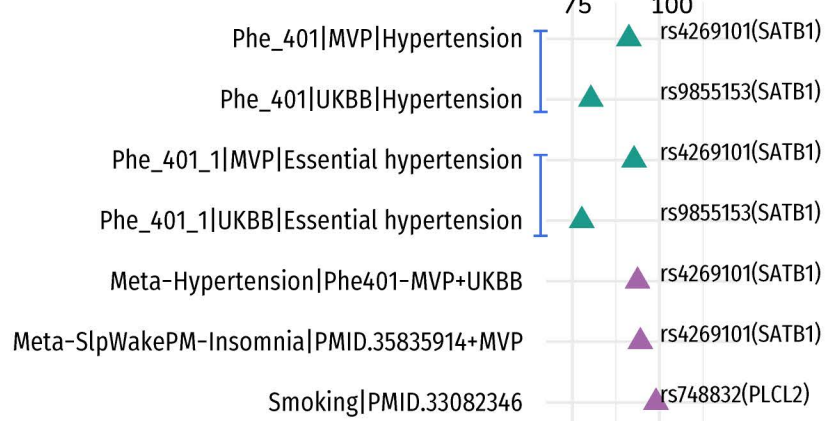

5q33.3

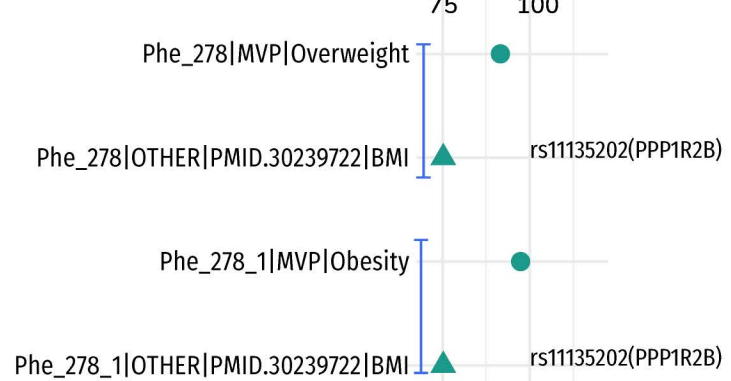

6q25.1

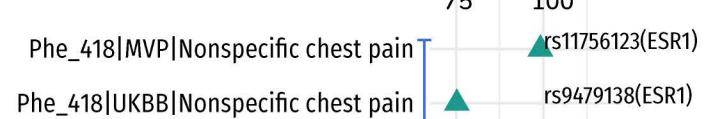

| Category                | Colocalization Posterior Probability Hypothesis |
|-------------------------|-------------------------------------------------|
| ● EHR                   | ● H3                                            |
| ● Heart Imaging         | ▲ H4                                            |
| ● LE8                   |                                                 |
| I Replicated EHR Traits |                                                 |

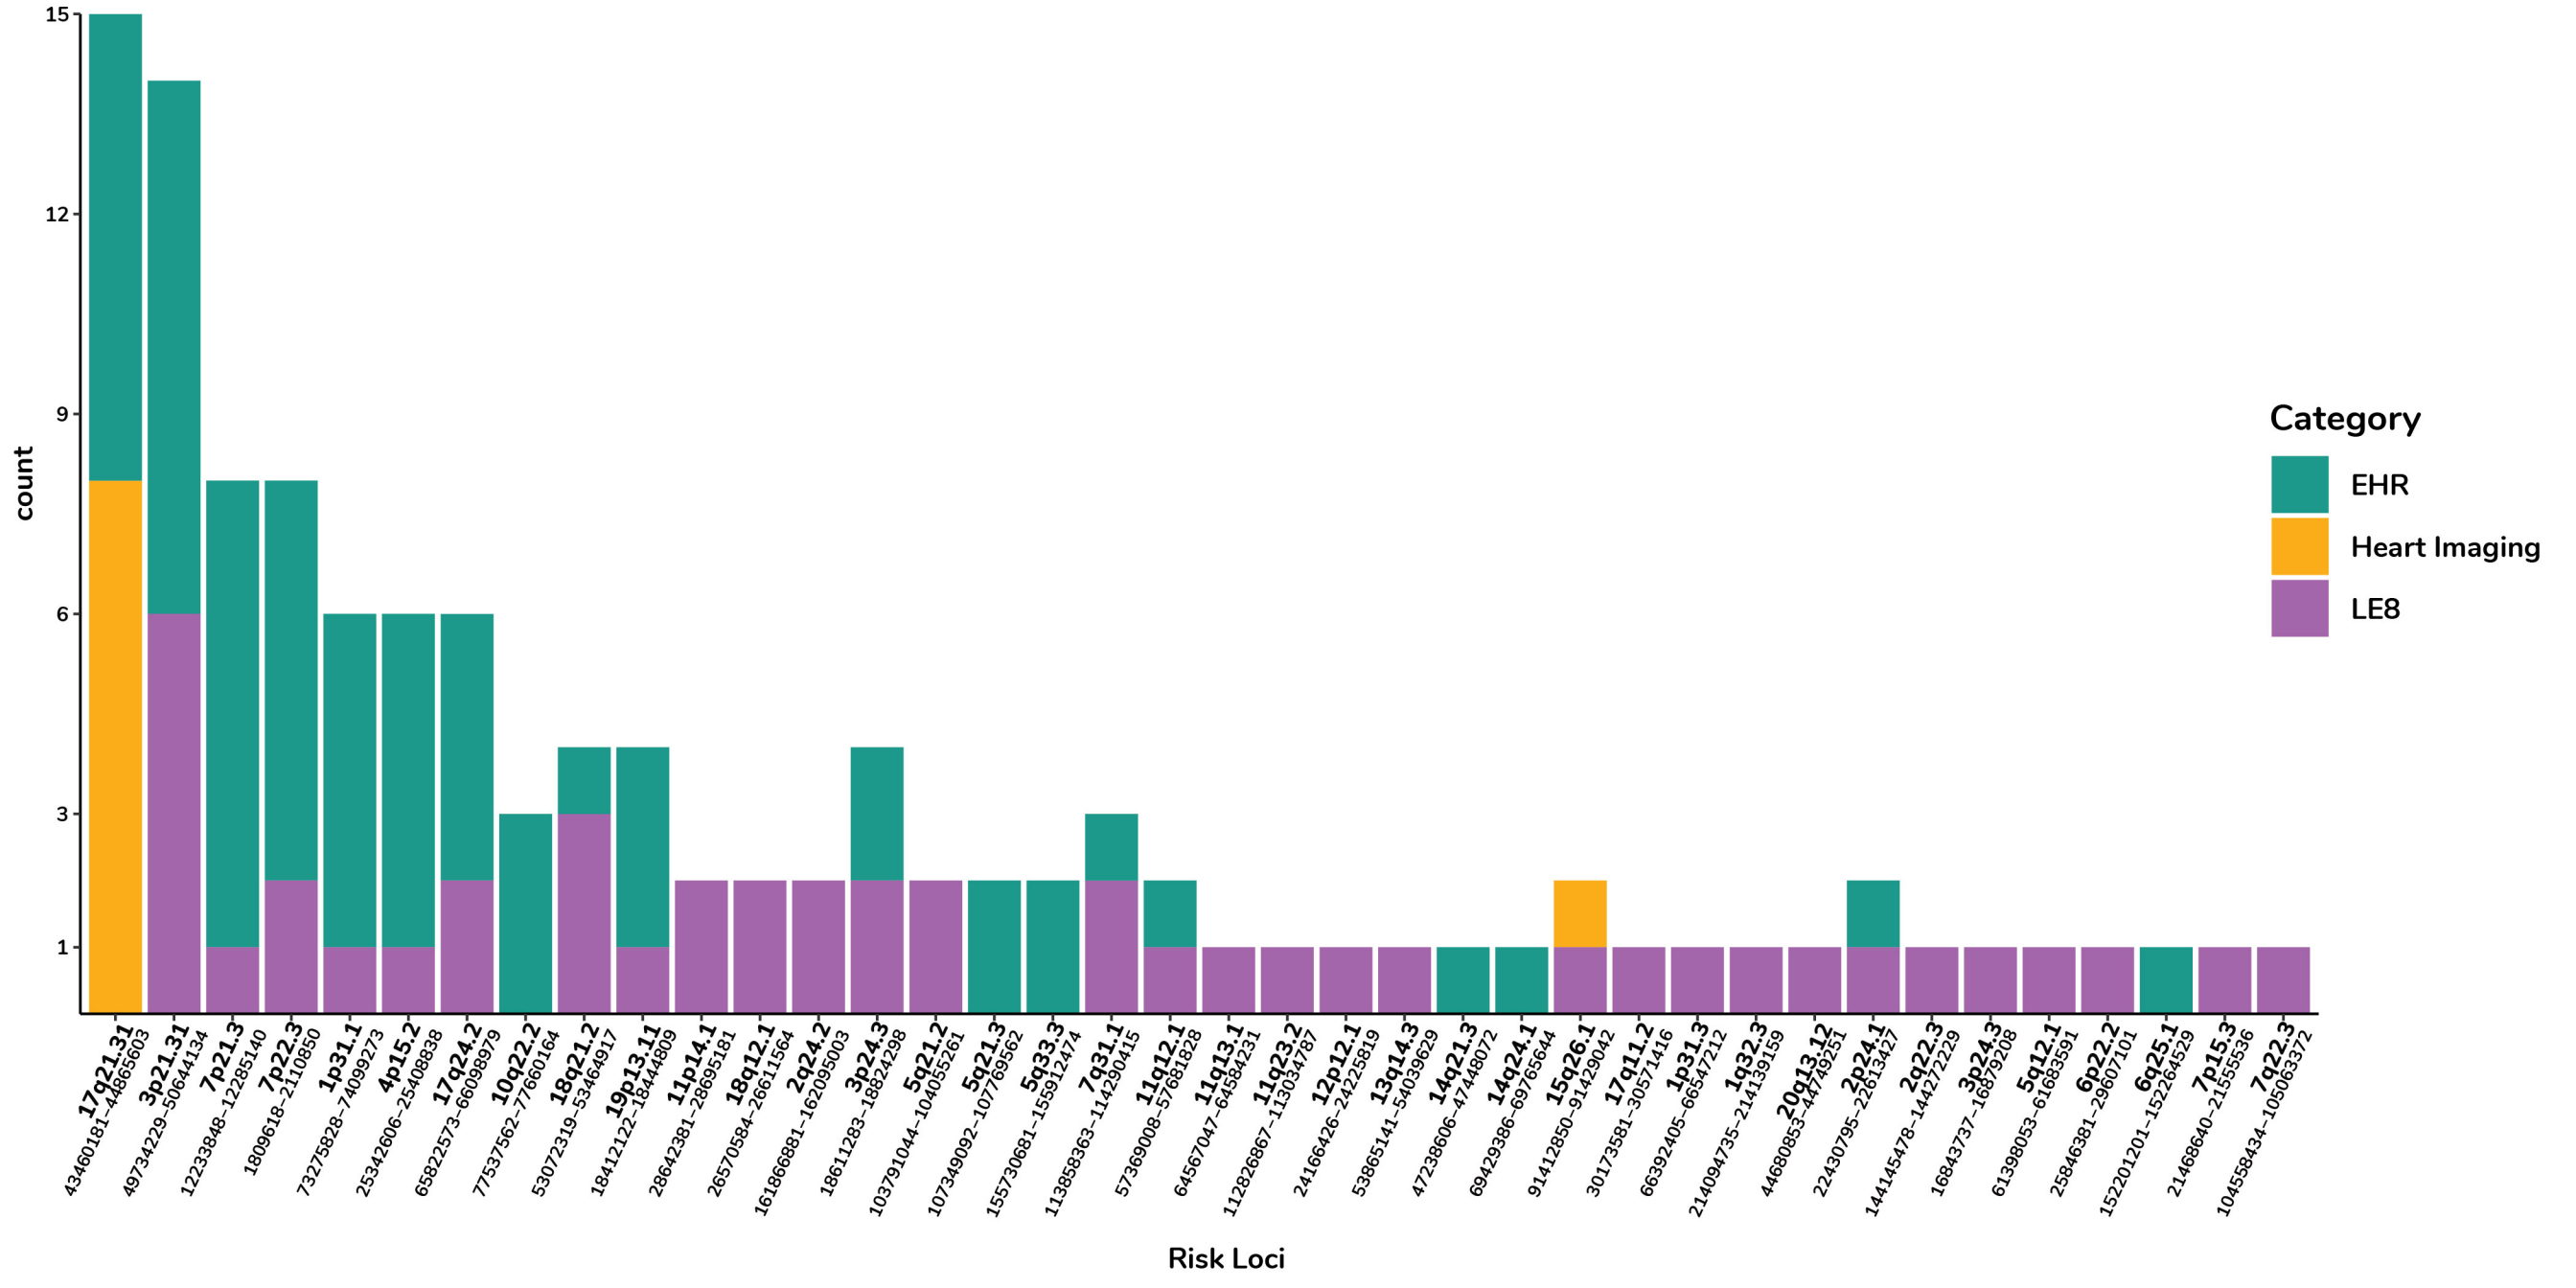





### Drugs for psychiatric conditions

### Drugs for cardiovascular conditions

### Drug Classes

### Drug Classes

### Gene targets

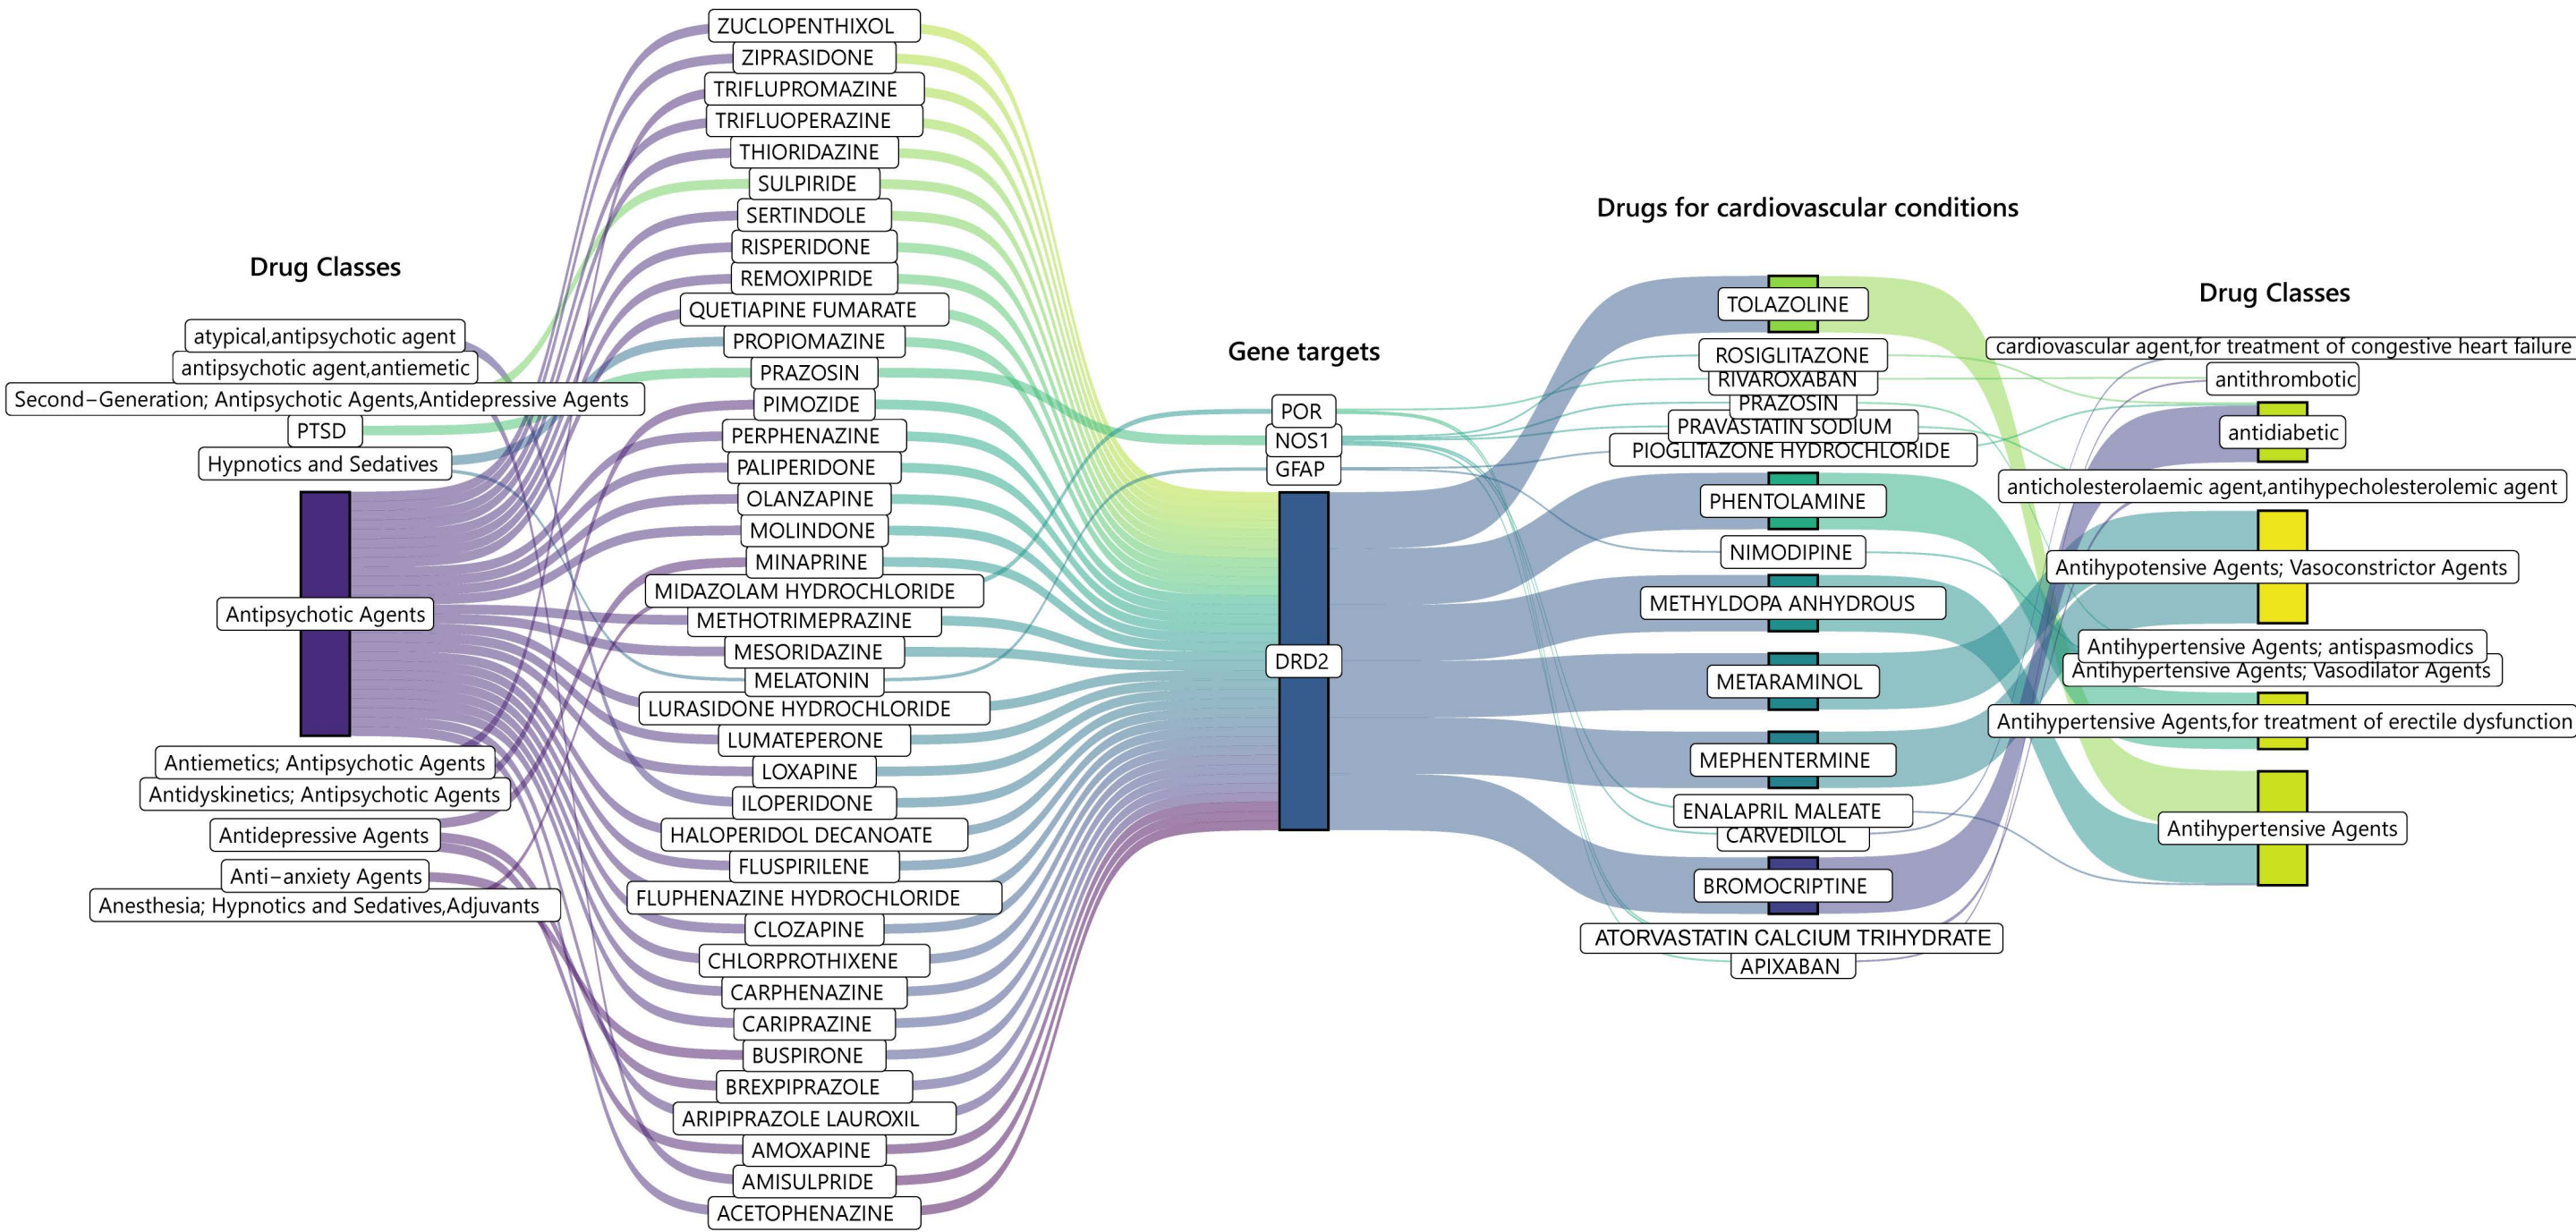

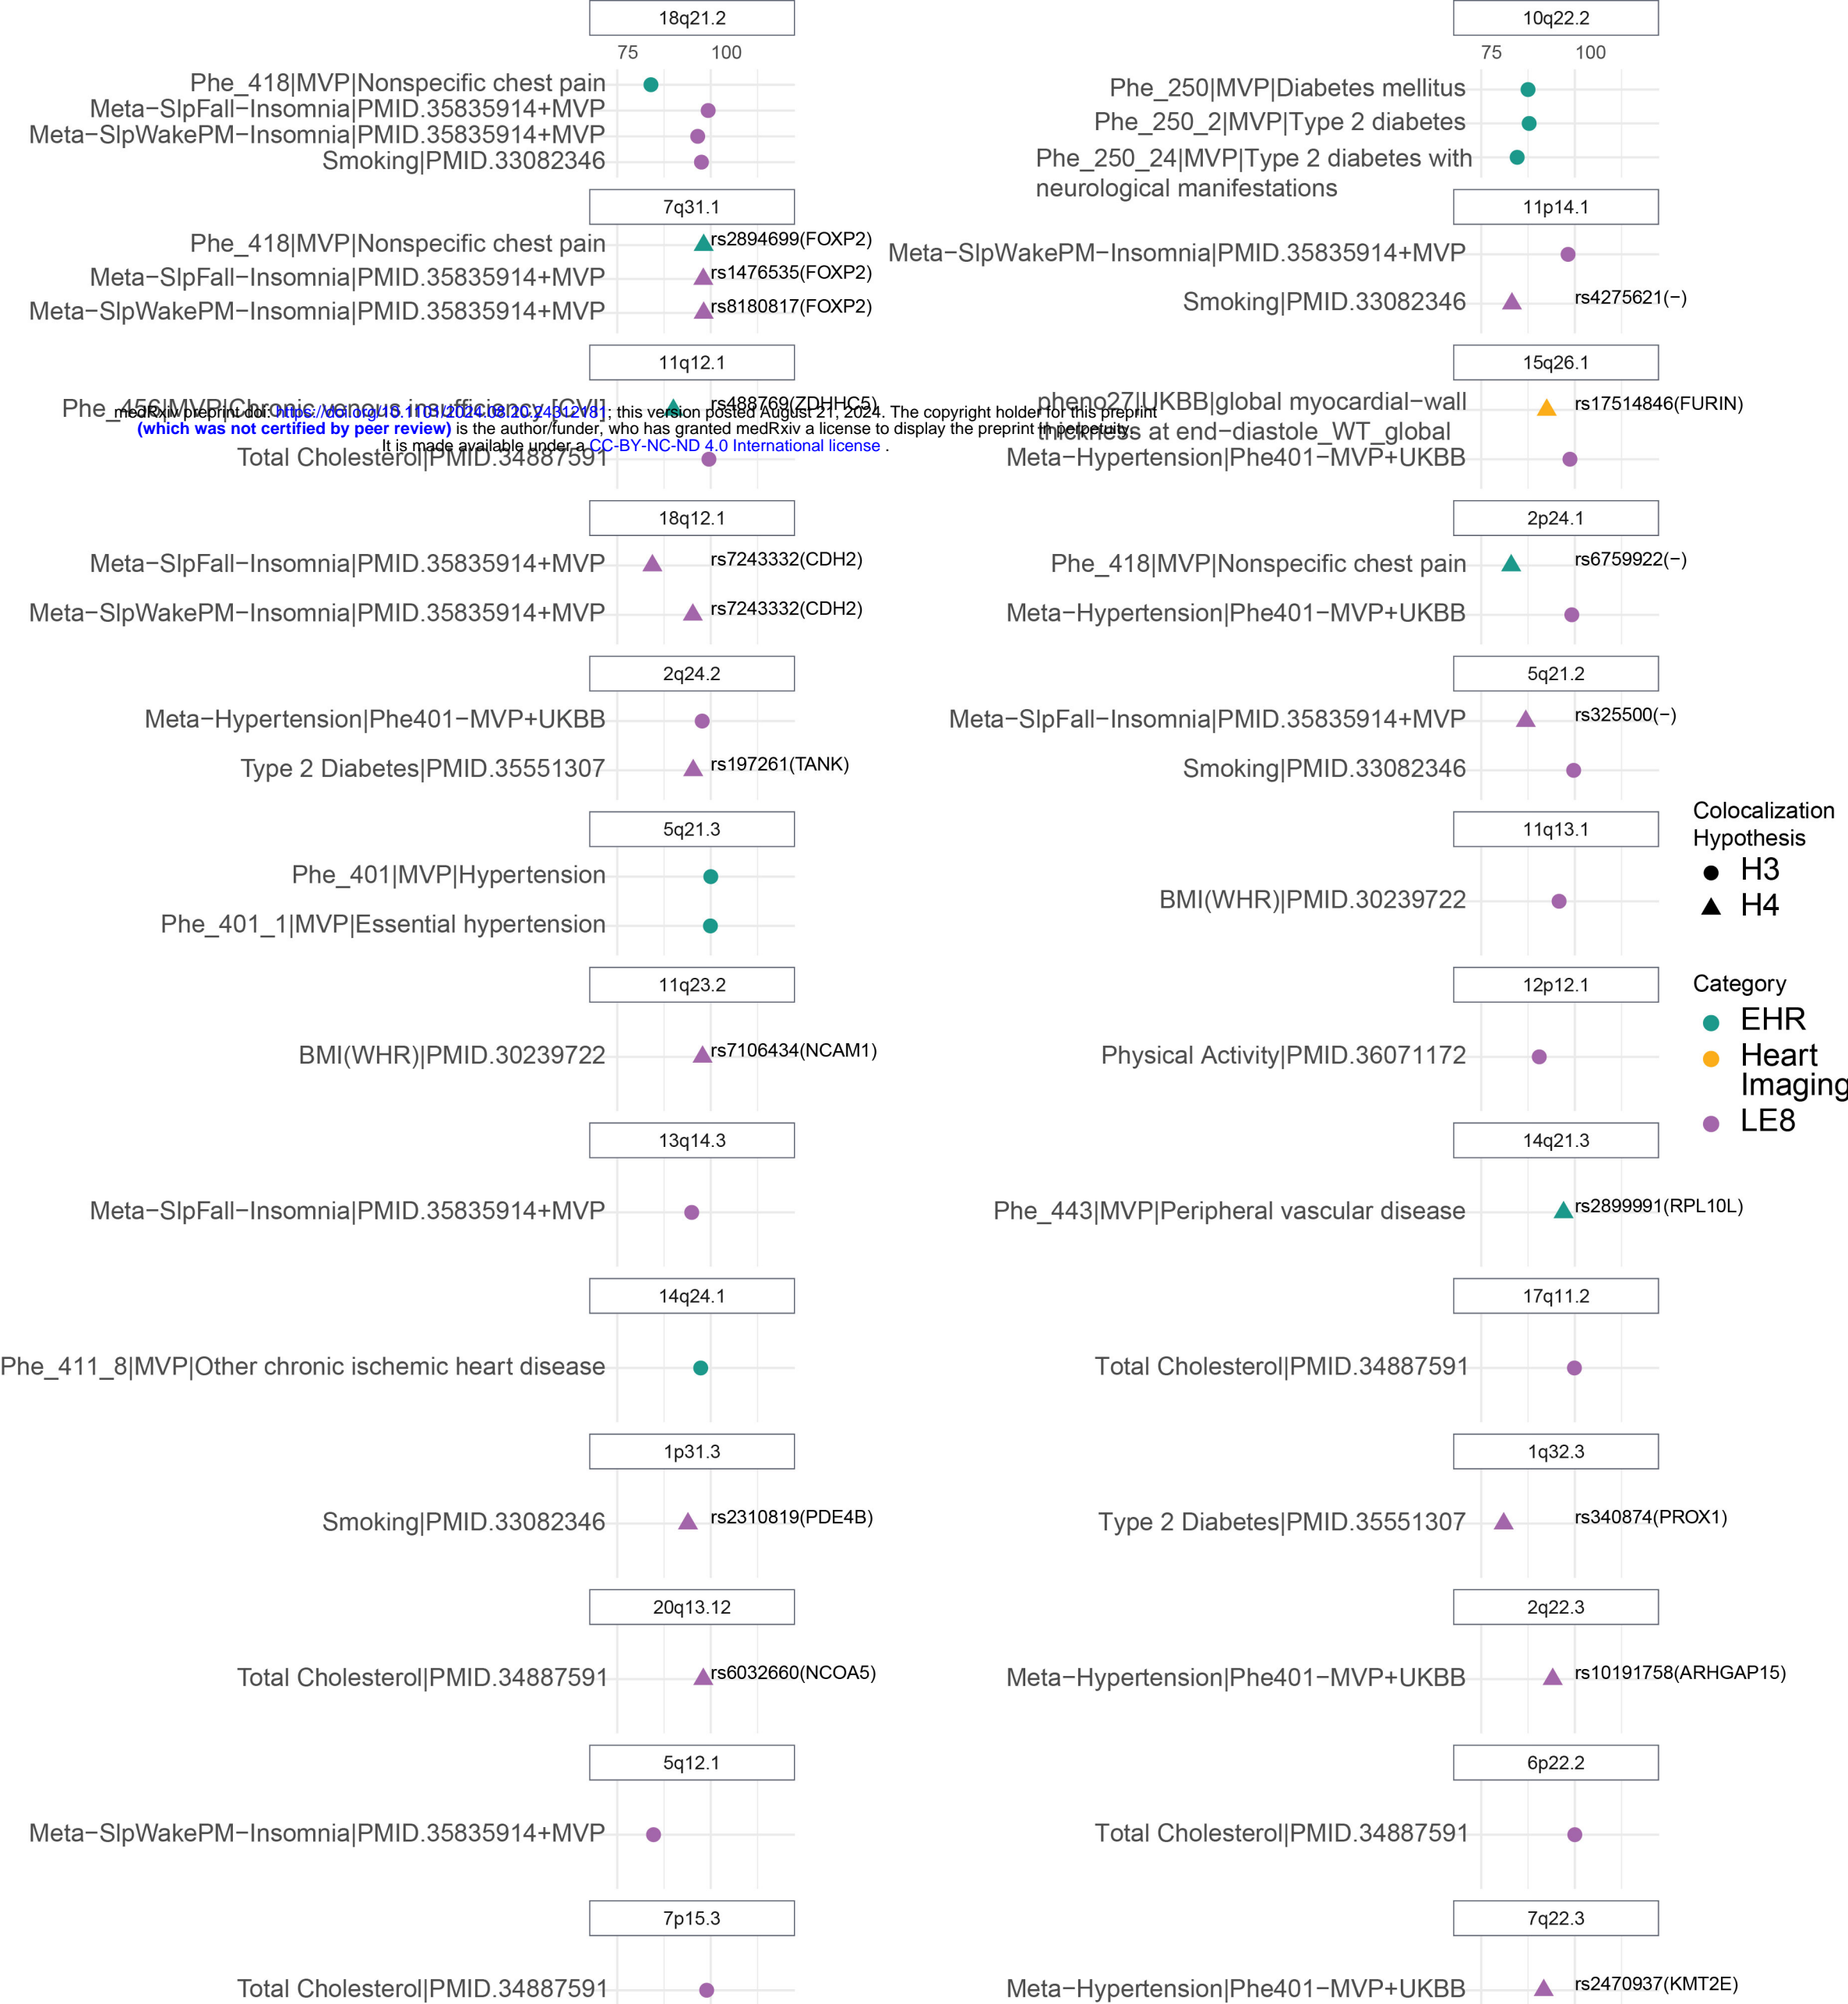

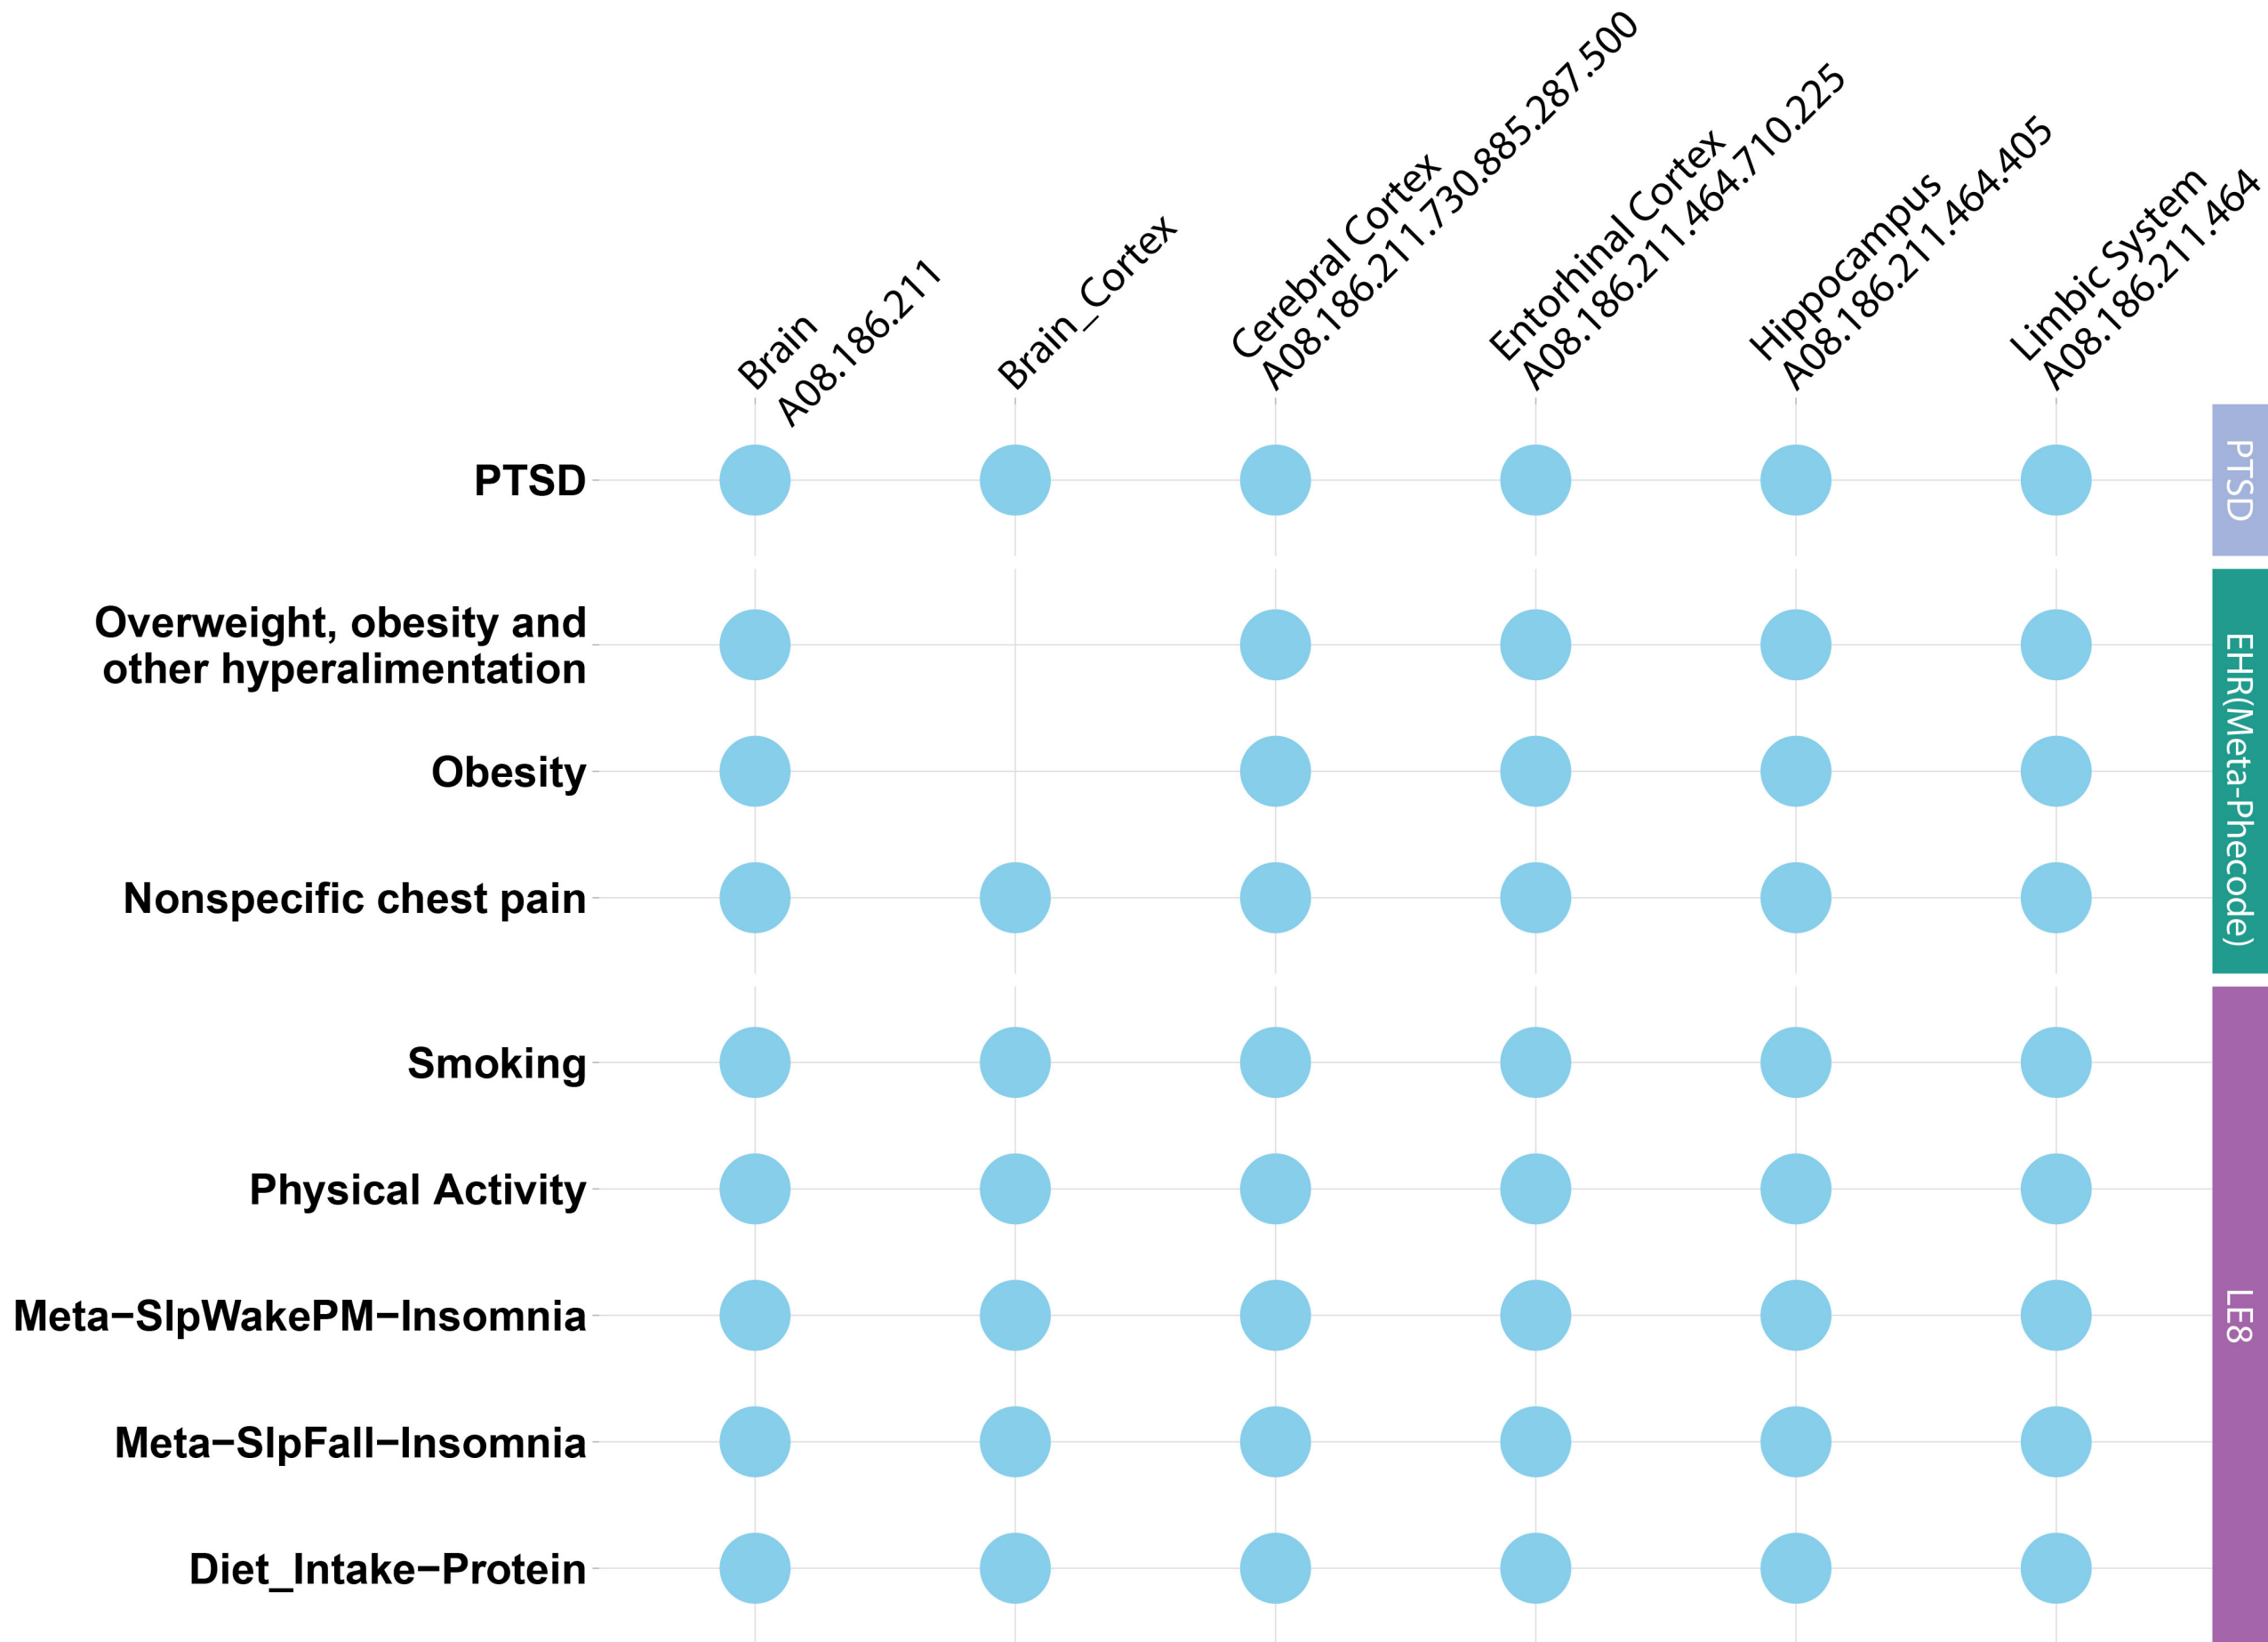

# Pathway

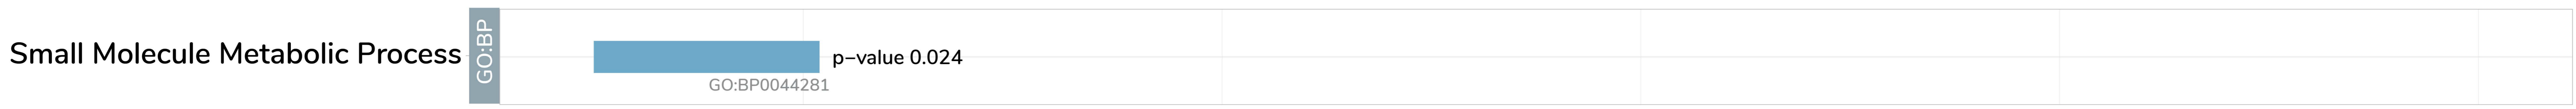

Cytoplasm p-value 1.49e-12 GO:CC0005737

Cytosol p-value 1.51e-04 GO:CC0005829

Mitochondrion p-value 5.60e-04 GO:CC0005739

Vesicle p-value 0.016 GO:CC0031982

Oxidoreductase Activity p-value 2.70e-04 GO:MF0016491

Nucleotide Binding p-value 4.01e-04 GO:MF0000166

Nucleoside Phosphate Binding p-value 4.05e-04 GO:MF1901265

Catalytic Activity p-value 8.20e-04 GO:MF0003824

Purine Nucleotide Binding p-value 8.97e-04 GO:MF0017076

Small Molecule Binding p-value 0.004 GO:MF0036094

Carbonyl Reductase (NADPH) Activity p-value 0.005 GO:MF0004090

Anion Binding p-value 0.012 GO:MF0043168

3-Sulfino-L-Alanine: Proton, Glutamate Antipporter Activity p-value 0.017 GO:MF0000514

Aspartate: Glutamate, Proton Antipporter Activity p-value 0.017 GO:MF0000515

Carbohydrate Derivative Binding p-value 0.029 GO:MF0097367

Adenyl Nucleotide Binding p-value 0.030 GO:MF0030554

Ribonucleotide Binding p-value 0.037 GO:MF0032553

Oxidoreductase Activity, Acting on the CH-OH Group of Donors, NAD or NADP as Acceptor p-value 0.039 GO:MF0016616

Sulfur-Containing Amino Acid Secondary Active Transmembrane Transporter Activity p-value 0.050 GO:MF1901680

Metabolic Pathways p-value 8.91e-04 KEGG01100

DAG and IP3 Signaling p-value 0.004 REACR-HSA-1489509

CaM Pathway p-value 0.040 REACR-HSA-111997

Calmodulin Induced Events p-value 0.040 REACR-HSA-111933

Ca-dependent Events p-value 0.050 REACR-HSA-111996

medRxiv preprint doi: <https://doi.org/10.1101/2024.08.20.24121281>; this version posted August 21, 2024. The copyright holder for this preprint (which was not certified by peer review) is the author/funder, who has granted medRxiv a license to display the preprint in perpetuity. It is made available under a CC-BY-NC-ND 4.0 International license.
